# Supplementary material for: Stereodivergent synthesis of right- and left-handed iminoxylitol heterodimers and monomers. Study of their impact on β-glucocerebrosidase activity
Source: Royal Society of Chemistry journal article supplement (doi:10.1039/c7ob00443e), 2017-01-01
Supplement: c7ob00443e1.pdf [file c7ob00443e1.pdf]

# SUPPORTING INFORMATION

---

## *Table of contents*

|                                                                                                                                                                        |           |
|------------------------------------------------------------------------------------------------------------------------------------------------------------------------|-----------|
| <b>Experimental procedures for the synthesis of 3-<i>O</i>-benzyl-<math>\alpha,\beta</math>-D-xylopyranose (15) from diacetone-D-glucose and analytical data .....</b> | <b>4</b>  |
| Scheme S1 .....                                                                                                                                                        | 4         |
| 3- <i>O</i> -Benzyl-1,2:5,6-di- <i>O</i> -isopropylidene- $\alpha$ -D-glucofuranose (S1).....                                                                          | 4         |
| 3- <i>O</i> -Benzyl-1,2- <i>O</i> -isopropylidene- $\alpha$ -D-glucofuranose (S2) .....                                                                                | 5         |
| 3- <i>O</i> -Benzyl-1,2- <i>O</i> -isopropylidene- $\alpha$ -D-xylofuranose (S3).....                                                                                  | 5         |
| 3- <i>O</i> -Benzyl- $\alpha,\beta$ -D-xylopyranose (15).....                                                                                                          | 6         |
| <b>Experimental procedures for the synthesis of arms and linkers and analytical data .....</b>                                                                         | <b>7</b>  |
| Scheme S2 .....                                                                                                                                                        | 7         |
| 1-Azidononane (26).....                                                                                                                                                | 7         |
| 6-Azidohexan-1-ol (27).....                                                                                                                                            | 8         |
| 10-Azidodecan-1-ol (28) .....                                                                                                                                          | 8         |
| 6-Azido-1-(4-methylbenzenesulfonate)hexan-1-ol (29).....                                                                                                               | 8         |
| 10-Azido-1-(4-methylbenzenesulfonate)decan-1-ol (30).....                                                                                                              | 9         |
| 1,6-Bis(4-methylbenzenesulfonate)hexan-1,6-diol (S4) .....                                                                                                             | 9         |
| Compound 31 .....                                                                                                                                                      | 10        |
| Triethylene glycol di(4-methylbenzenesulfonate) (S5).....                                                                                                              | 10        |
| Compound 32 .....                                                                                                                                                      | 11        |
| Tetraethylene glycol di(4-methylbenzenesulfonate) (S6) .....                                                                                                           | 11        |
| Compound 33 .....                                                                                                                                                      | 12        |
| Tetraethylene glycol mono(4-methylbenzenesulfonate) (S7) .....                                                                                                         | 12        |
| 2-[2-[2-(2-Azidoethoxy)ethoxy]ethoxy]ethanol (S8).....                                                                                                                 | 13        |
| 1-Azido-2-[2-[2-(2-methoxyethoxy)ethoxy]ethoxy]ethane (34).....                                                                                                        | 13        |
| <b>Copies of NMR Spectra .....</b>                                                                                                                                     | <b>14</b> |
| Fig S1. $^1\text{H}$ NMR (300 MHz, $\text{CD}_3\text{OD}$ ) and $^{13}\text{C}$ (100 MHz, $\text{CD}_3\text{OD}$ ) spectra of compound 15. ....                        | 14        |
| Fig S2. $^1\text{H}$ NMR (300 MHz, Acetone- $d_6$ ) and $^{13}\text{C}$ (100 MHz, Acetone- $d_6$ ) spectra of compound 16. ....                                        | 15        |
| Fig S3. $^1\text{H}$ NMR (400 MHz, $\text{CDCl}_3$ ) and $^{13}\text{C}$ (100 MHz, $\text{CDCl}_3$ ) spectra of compound 17. ....                                      | 16        |
| Fig S4. $^1\text{H}$ NMR (400 MHz, $\text{CDCl}_3$ ) and $^{13}\text{C}$ (100 MHz, $\text{CDCl}_3$ ) spectra of compound 18. ....                                      | 17        |
| Fig S5. $^1\text{H}$ NMR (400 MHz, $\text{CDCl}_3$ ) and $^{13}\text{C}$ (100 MHz, $\text{CDCl}_3$ ) spectra of compound 19. ....                                      | 18        |
| Fig S6. $^1\text{H}$ NMR (400 MHz, $\text{CDCl}_3$ ) and $^{13}\text{C}$ (100 MHz, $\text{CDCl}_3$ ) spectra of compound 20. ....                                      | 19        |

|                                                                                                                                              |    |
|----------------------------------------------------------------------------------------------------------------------------------------------|----|
| Fig S7. <sup>1</sup> H NMR (400 MHz, CDCl <sub>3</sub> ) and <sup>13</sup> C (100 MHz, CDCl <sub>3</sub> ) spectra of compound 21. ....      | 20 |
| Fig S8. <sup>1</sup> H NMR (400 MHz, CDCl <sub>3</sub> ) and <sup>13</sup> C (100 MHz, CDCl <sub>3</sub> ) spectra of compound 22. ....      | 21 |
| Fig S9. <sup>1</sup> H NMR (400 MHz, CDCl <sub>3</sub> ) and <sup>13</sup> C (100 MHz, CDCl <sub>3</sub> ) spectra of compound 23. ....      | 22 |
| Fig S10. <sup>1</sup> H NMR (400 MHz, CDCl <sub>3</sub> ) and <sup>13</sup> C (100 MHz, CDCl <sub>3</sub> ) spectra of compound 24. ....     | 23 |
| Fig S11. <sup>1</sup> H NMR (300 MHz, CDCl <sub>3</sub> ) and <sup>13</sup> C (75.5MHz, CDCl <sub>3</sub> ) spectra of compound 25. ....     | 24 |
| Fig S12. <sup>1</sup> H NMR (400 MHz, CDCl <sub>3</sub> ) and <sup>13</sup> C (100 MHz, CDCl <sub>3</sub> ) spectra of compound (+)-14. .... | 25 |
| Fig S13. <sup>1</sup> H NMR (400 MHz, CDCl <sub>3</sub> ) and <sup>13</sup> C (100 MHz, CDCl <sub>3</sub> ) spectra of compound 31. ....     | 26 |
| Fig S14. <sup>1</sup> H NMR (400 MHz, CDCl <sub>3</sub> ) and <sup>13</sup> C (75.5 MHz, CDCl <sub>3</sub> ) spectra of compound 32. ....    | 27 |
| Fig S15. <sup>1</sup> H NMR (400 MHz, CDCl <sub>3</sub> ) and <sup>13</sup> C (100 MHz, CDCl <sub>3</sub> ) spectra of compound 33. ....     | 28 |
| Fig S16. <sup>1</sup> H NMR (400 MHz, CDCl <sub>3</sub> ) and <sup>13</sup> C (75.5 MHz, CDCl <sub>3</sub> ) spectra of compound 35a. ....   | 29 |
| Fig S17. <sup>1</sup> H NMR (400 MHz, CDCl <sub>3</sub> ) and <sup>13</sup> C (75.5 MHz, CDCl <sub>3</sub> ) spectra of compound 35b. ....   | 30 |
| Fig S18. <sup>1</sup> H NMR (400 MHz, CDCl <sub>3</sub> ) and <sup>13</sup> C (75.5 MHz, CDCl <sub>3</sub> ) spectra of compound 35c. ....   | 31 |
| Fig S19. <sup>1</sup> H NMR (400 MHz, CDCl <sub>3</sub> ) and <sup>13</sup> C (100 MHz, CDCl <sub>3</sub> ) spectra of compound 35d. ....    | 32 |
| Fig S20. <sup>1</sup> H NMR (400 MHz, CDCl <sub>3</sub> ) and <sup>13</sup> C (100 MHz, CDCl <sub>3</sub> ) spectra of compound 35e. ....    | 33 |
| Fig S21. <sup>1</sup> H NMR (400 MHz, CDCl <sub>3</sub> ) and <sup>13</sup> C (100 MHz, CDCl <sub>3</sub> ) spectra of compound 36a. ....    | 34 |
| Fig S22. <sup>1</sup> H NMR (400 MHz, CDCl <sub>3</sub> ) and <sup>13</sup> C (100 MHz, CDCl <sub>3</sub> ) spectra of compound 36b. ....    | 35 |
| Fig S23. <sup>1</sup> H NMR (400 MHz, CDCl <sub>3</sub> ) and <sup>13</sup> C (100 MHz, CDCl <sub>3</sub> ) spectra of compound 36c. ....    | 36 |
| Fig S24. <sup>1</sup> H NMR (400 MHz, CDCl <sub>3</sub> ) and <sup>13</sup> C (100 MHz, CDCl <sub>3</sub> ) spectra of compound 36d. ....    | 37 |
| Fig S25. <sup>1</sup> H NMR (400 MHz, CDCl <sub>3</sub> ) and <sup>13</sup> C (100 MHz, CDCl <sub>3</sub> ) spectra of compound 36e. ....    | 38 |
| Fig S26. <sup>1</sup> H NMR (400 MHz, CDCl <sub>3</sub> ) and <sup>13</sup> C (100 MHz, CDCl <sub>3</sub> ) spectra of compound 37a. ....    | 39 |
| Fig S27. <sup>1</sup> H NMR (400 MHz, CDCl <sub>3</sub> ) and <sup>13</sup> C (100 MHz, CDCl <sub>3</sub> ) spectra of compound 37b. ....    | 40 |
| Fig S28. <sup>1</sup> H NMR (400 MHz, CDCl <sub>3</sub> ) and <sup>13</sup> C (75.5 MHz, CDCl <sub>3</sub> ) spectra of compound 37c. ....   | 41 |
| Fig S29. <sup>1</sup> H NMR (300 MHz, CDCl <sub>3</sub> ) and <sup>13</sup> C (75.5 MHz, CDCl <sub>3</sub> ) spectra of compound 37d. ....   | 42 |
| Fig S30. <sup>1</sup> H NMR (300 MHz, CDCl <sub>3</sub> ) and <sup>13</sup> C (75.5 MHz, CDCl <sub>3</sub> ) spectra of compound 37e. ....   | 43 |
| Fig S31. <sup>1</sup> H NMR (400 MHz, D <sub>2</sub> O) and <sup>13</sup> C (75.5 MHz, D <sub>2</sub> O) spectra of compound 9a. ....        | 44 |
| Fig S32. <sup>1</sup> H NMR (400 MHz, D <sub>2</sub> O) and <sup>13</sup> C (100 MHz, D <sub>2</sub> O) spectra of compound 9b. ....         | 45 |
| Fig S33. <sup>1</sup> H NMR (400 MHz, D <sub>2</sub> O) and <sup>13</sup> C (100 MHz, D <sub>2</sub> O) spectra of compound 9c. ....         | 46 |
| Fig S34. <sup>1</sup> H NMR (400 MHz, D <sub>2</sub> O) and <sup>13</sup> C (100 MHz, D <sub>2</sub> O) spectra of compound 9d. ....         | 47 |
| Fig S35. <sup>1</sup> H NMR (400 MHz, CD <sub>3</sub> OD) and <sup>13</sup> C (100 MHz, CD <sub>3</sub> OD) spectra of compound 9e. ....     | 48 |
| Fig S36. <sup>1</sup> H NMR (300 MHz, CDCl <sub>3</sub> ) and <sup>13</sup> C (75.5 MHz, CDCl <sub>3</sub> ) spectra of compound 38. ....    | 49 |
| Fig S37. <sup>1</sup> H NMR (400 MHz, CD <sub>3</sub> OD) and <sup>13</sup> C (100 MHz, CD <sub>3</sub> OD) spectra of compound (+)-10. .... | 50 |
| Fig S38. <sup>1</sup> H NMR (400 MHz, CDCl <sub>3</sub> ) and <sup>13</sup> C (75.5 MHz, CDCl <sub>3</sub> ) spectra of compound 39. ....    | 51 |
| Fig S39. <sup>1</sup> H NMR (400 MHz, CDCl <sub>3</sub> ) and <sup>13</sup> C (75.5 MHz, CDCl <sub>3</sub> ) spectra of compound 40. ....    | 52 |
| Fig S40. <sup>1</sup> H NMR (400 MHz, CDCl <sub>3</sub> ) and <sup>13</sup> C (100 MHz, CDCl <sub>3</sub> ) spectra of compound 41. ....     | 53 |
| Fig S41. <sup>1</sup> H NMR (400 MHz, CDCl <sub>3</sub> ) and <sup>13</sup> C (75.5 MHz, CDCl <sub>3</sub> ) spectra of compound 42a. ....   | 54 |
| Fig S42. <sup>1</sup> H NMR (300 MHz, CDCl <sub>3</sub> ) and <sup>13</sup> C (75.5 MHz, CDCl <sub>3</sub> ) spectra of compound 42b. ....   | 55 |
| Fig S43. <sup>1</sup> H NMR (400 MHz, CDCl <sub>3</sub> ) and <sup>13</sup> C (100 MHz, CDCl <sub>3</sub> ) spectra of compound 42c. ....    | 56 |

|                                                                                                                                          |           |
|------------------------------------------------------------------------------------------------------------------------------------------|-----------|
| Fig S44. <sup>1</sup> H NMR (400 MHz, CD <sub>3</sub> OD) and <sup>13</sup> C (100 MHz, CD <sub>3</sub> OD) spectra of compound (+)-11a. | 57        |
| Fig S45. <sup>1</sup> H NMR (400 MHz, CD <sub>3</sub> OD) and <sup>13</sup> C (100 MHz, CD <sub>3</sub> OD) spectra of compound (+)-11b. | 58        |
| Fig S46. <sup>1</sup> H NMR (400 MHz, CD <sub>3</sub> OD) and <sup>13</sup> C (100 MHz, CD <sub>3</sub> OD) spectra of compound (+)-11c. | 59        |
| Fig S47. <sup>1</sup> H NMR (400 MHz, CDCl <sub>3</sub> ) and <sup>13</sup> C (75.5 MHz, CDCl <sub>3</sub> ) spectra of compound 43a.    | 60        |
| Fig S48. <sup>1</sup> H NMR (400 MHz, CDCl <sub>3</sub> ) and <sup>13</sup> C (100 MHz, CDCl <sub>3</sub> ) spectra of compound 43b.     | 61        |
| Fig S49. <sup>1</sup> H NMR (400 MHz, CD <sub>3</sub> OD) and <sup>13</sup> C (100 MHz, CD <sub>3</sub> OD) spectra of compound (-)-12.  | 62        |
| Fig S50. <sup>1</sup> H NMR (400 MHz, CDCl <sub>3</sub> ) and <sup>13</sup> C (100 MHz, CDCl <sub>3</sub> ) spectra of compound 44.      | 63        |
| Fig S51. <sup>1</sup> H NMR (400 MHz, CD <sub>3</sub> OD) and <sup>13</sup> C (100 MHz, CD <sub>3</sub> OD) spectra of compound (+)-13.  | 64        |
| Fig S52. <sup>1</sup> H NMR (400 MHz, CDCl <sub>3</sub> ) and <sup>13</sup> C (100 MHz, CDCl <sub>3</sub> ) spectra of compound 45.      | 65        |
| Fig S53. <sup>1</sup> H NMR (400 MHz, CDCl <sub>3</sub> ) and <sup>13</sup> C (100 MHz, CDCl <sub>3</sub> ) spectra of compound 46.      | 66        |
| <b>Biological evaluation</b>                                                                                                             | <b>67</b> |
| Table S1 Activity towards glycosidases.                                                                                                  | 67        |
| Figure S54 GBA1 activity enhancement.                                                                                                    | 68        |
| Figure S55 Synergistic effect evaluation.                                                                                                | 69        |
| Figures S56 – S69. Lineweaver-Burk plots for K <sub>i</sub> determinations.                                                              | 70–83     |
| <b>References</b>                                                                                                                        | <b>84</b> |

## Experimental procedures for the synthesis of 3-O-benzyl- $\alpha$ , $\beta$ -D-xylopyranose (15) from diacetone-D-glucose and analytical data

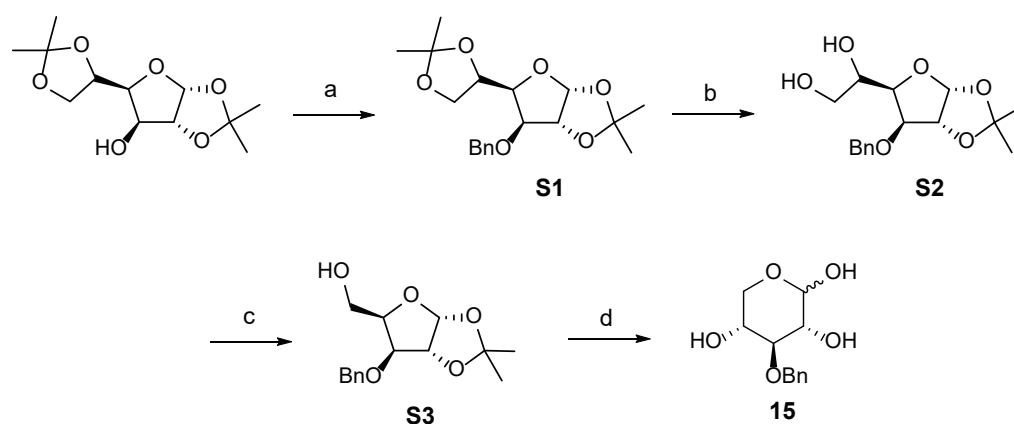

### Scheme S1. Synthesis of 3-O-benzyl- $\alpha$ -D-xylopyranose **15**.

(a) BnBr, NaH, DMF, r.t., 4 h, 99%; (b) AcOH, H<sub>2</sub>O, 45 °C, 19 h, 85%; (c) 1) NaIO<sub>4</sub>, MeOH, H<sub>2</sub>O, r.t., 1.5 h; 2) NaBH<sub>4</sub>, MeOH, 0 °C, 40 min, 99%; (d) 1M H<sub>2</sub>SO<sub>4</sub>, THF, 60 °C, 16 h, 98%.

### 3-O-Benzyl-1,2:5,6-di-O-isopropylidene- $\alpha$ -D-glucopyranose (S1)

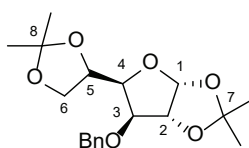

To a solution of diacetone-D-glucose (20.0 g, 76.84 mmol) in dry DMF (240 mL) at 0 °C was added portionwise NaH (2.5 eq., 7.80 g, 195.02 mmol, 60% on mineral oil) and the reaction mixture was stirred at room temperature for 1 h. BnBr (1.5 eq., 13.8 mL, 115.36 mmol) was added and the mixture was kept stirring at room temperature for 4 h. For quenching, MeOH (30 mL) was slowly added. The solvent was then evaporated under reduced pressure. The residue was diluted with Et<sub>2</sub>O (150 mL) and water (100 mL), the organic layer was separated and the aqueous layer was extracted with Et<sub>2</sub>O (2×150 mL). The combined organic layers were washed successively with sat. aqueous NaHCO<sub>3</sub> and water, dried over MgSO<sub>4</sub>, filtered and concentrated under reduced pressure. The crude residue was purified by flash column chromatography (AcOEt/Petroleum ether, 5:95 to 20:80) to afford **S1** (26.55 g, 99%) as a yellow oil. The analytical data of **S1** are in accordance with literature data.<sup>1</sup> **<sup>1</sup>H-NMR (CDCl<sub>3</sub>, 300 MHz)**  $\delta$  1.31 (s, 3H; CH<sub>3</sub>), 1.38 (s, 3H; CH<sub>3</sub>), 1.43 (s, 3H; CH<sub>3</sub>), 1.49 (s, 3H; CH<sub>3</sub>), 4.00 (dd,  $J$  = 8.7, 5.9 Hz, 1H; H<sup>A</sup>-6), 4.02 (d,  $J$  = 2.9 Hz, 1H; H-3), 4.12 (dd,  $J$  = 8.7, 6.2 Hz, 1H; H<sup>B</sup>-6), 4.15 (dd,  $J$  = 7.7, 3.1 Hz, 1H; H-4), 4.37 (ddd,  $J$  = 7.7, 6.2, 5.9 Hz, 1H; H-5), 4.59 (d,  $J$  = 3.7 Hz, 1H; H-2), 4.63 (d,  $J$  = 11.9 Hz, 1H; OCH<sub>2</sub>Ph), 4.69 (d,  $J$  = 11.9 Hz, 1H; OCH<sub>2</sub>Ph), 5.90 (d,  $J$  = 3.7 Hz, 1H; H-1), 7.27-7.35 (m, 5H; H<sub>Ar</sub>). **<sup>13</sup>C-NMR (CDCl<sub>3</sub>, 100 MHz)**  $\delta$  25.6, 26.4, 26.9, 27.0 (4×CH<sub>3</sub>), 67.5 (C-6), 72.5 (OCH<sub>2</sub>Ph), 72.7 (C-5), 81.5 (C-4), 81.9 (C-3), 82.8 (C-2), 105.4 (C-1), 109.1 (C-7), 111.9 (C-8), 127.8, 128.0, 128.5 (5×CH<sub>Ar</sub>), 137.8 (C<sub>Ar</sub>).



### 3-*O*-Benzyl-1,2-*O*-isopropylidene- $\alpha$ -D-glucopyranose (**S2**)

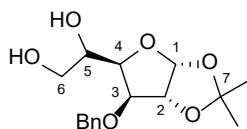

Compound **S1** (13.46 g, 38.41 mmol) was dissolved in a mixture of AcOH and water (1:1, 40 mL) and the solution was heated at 45 °C for 19 h. The solvent was removed under reduced pressure and the residue was dissolved in AcOEt and washed with sat. aqueous NaHCO<sub>3</sub> until neutral. The aqueous layers were extracted with AcOEt and the combined organic layers were dried over MgSO<sub>4</sub>, filtered and concentrated under reduced pressure. The crude residue was purified by flash column chromatography (AcOEt/Petroleum ether, 40:60 to 60:40) to afford **S2** (10.18 g, 85%) as a colorless oil. The analytical data of **S2** are in accordance with literature data.<sup>2</sup> <sup>1</sup>H-NMR (CDCl<sub>3</sub>, 300 MHz)  $\delta$  1.32 (s, 3H; CH<sub>3</sub>), 1.49 (s, 3H; CH<sub>3</sub>), 2.12 (dd,  $J = 6.5, 5.7$  Hz, 1H; OH), 2.52 (d,  $J = 6.2$  Hz, 1H; OH), 3.69 (ddd,  $J = 11.5, 5.7, 5.6$  Hz, 1H; H<sup>A</sup>-6), 3.81 (ddd,  $J = 11.5, 6.5, 3.4$  Hz, 1H; H<sup>B</sup>-6), 4.03 (dddd,  $J = 7.4, 6.0, 5.6, 3.4$  Hz, 1H; H-5), 4.10 (d,  $J = 3.3$  Hz, 1H; H-3), 4.13 (dd,  $J = 7.4, 3.3$  Hz, 1H; H-4), 4.54 (d,  $J = 11.9$  Hz, 1H; OCH<sub>2</sub>Ph), 4.63 (d,  $J = 3.7$  Hz, 1H; H-2), 4.74 (d,  $J = 11.9$  Hz, 1H; OCH<sub>2</sub>Ph), 5.94 (d,  $J = 3.7$  Hz, 1H; H-1), 7.28-7.41 (m, 5H; H<sub>Ar</sub>). <sup>13</sup>C-NMR (CDCl<sub>3</sub>, 100 MHz)  $\delta$  26.4, 26.9 (2 $\times$ CH<sub>3</sub>), 64.6 (C-6), 69.5 (C-5), 72.3 (OCH<sub>2</sub>Ph), 80.2 (C-4), 82.2 (C-3), 82.3 (C-2), 105.3 (C-1), 112.0 (C-7), 128.0, 128.4, 128.9 (5 $\times$ CH<sub>Ar</sub>), 137.3 (C<sub>Ar</sub>).

### 3-*O*-Benzyl-1,2-*O*-isopropylidene- $\alpha$ -D-xylofuranose (**S3**)

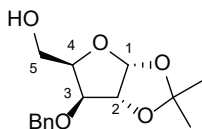

Compound **S2** (16.81 g, 54.17 mmol) was dissolved in a mixture of H<sub>2</sub>O and MeOH (1:1, 230 mL) then NaIO<sub>4</sub> (1.2 eq., 13.44 g, 62.83 mmol) was added to the solution. The reaction mixture was stirred at room temperature for 1 h 30, then ethylene glycol (1 eq., 3 mL, 53.80 mmol) was added, followed by additional stirring for 20 min. The mixture was diluted with cold MeOH (300 mL), the resulting white precipitate was filtered off and the filtrate was concentrated under reduced pressure. This step was repeated once.

The residue was dissolved in MeOH (180 mL) and NaBH<sub>4</sub> (1.1 eq., 2.19 g, 57.96 mmol) was added at 0 °C. The reaction mixture was stirred at 0 °C for 40 min, and then quenched by addition of AcOH (3.6 mL). The solvent was removed under reduced pressure. The residue was dissolved in CH<sub>2</sub>Cl<sub>2</sub> and washed with sat. aqueous NaHCO<sub>3</sub>. The aqueous layer was extracted with CH<sub>2</sub>Cl<sub>2</sub>. The combined organic layers were washed with brine, dried over MgSO<sub>4</sub>, filtered, and concentrated under reduced pressure to afford **S3** (15.15 g, 99%) as a colorless oil. The analytical data of **S3** are in accordance with literature data.<sup>3</sup> <sup>1</sup>H-NMR (CDCl<sub>3</sub>, 400 MHz)  $\delta$  1.33 (s, 3H; CH<sub>3</sub>), 1.49 (s, 3H; CH<sub>3</sub>), 2.08 (br s, 1H; OH), 3.86 (dd,  $J = 12.0, 4.7$  Hz, 1H; H<sup>A</sup>-5), 3.95 (dd,  $J = 12.0, 5.2$  Hz, 1H; H<sup>B</sup>-5), 4.02 (d,  $J = 3.5$  Hz, 1H; H-3), 4.28 (ddd,  $J = 5.2, 4.7, 3.5$  Hz, 1H; H-4), 4.49 (d,  $J = 11.9$  Hz, 1H; OCH<sub>2</sub>Ph), 4.64 (d,  $J = 3.9$  Hz, 1H; H-2), 4.72 (d,  $J = 11.9$  Hz, 1H; OCH<sub>2</sub>Ph), 5.99 (d,  $J = 3.8$  Hz, 1H; H-1), 7.29-7.39

(m, 5H; H<sub>Ar</sub>). <sup>13</sup>C-NMR (CDCl<sub>3</sub>, 100 MHz) δ 26.5, 27.0 (2×CH<sub>3</sub>), 61.2 (C-5), 72.1 (OCH<sub>2</sub>Ph), 80.2 (C-4), 82.6 (C-2), 82.9 (C-3), 105.2 (C-1), 111.9 (C(CH<sub>3</sub>)<sub>2</sub>), 127.9, 128.4, 128.8 (5×CH<sub>Ar</sub>), 137.2 (C<sub>Ar</sub>).

### 3-*O*-Benzyl- $\alpha,\beta$ -D-xylopyranose (**15**)

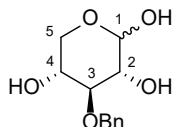

A solution of **S3** (1.34 g, 4.78 mmol) in 1M H<sub>2</sub>SO<sub>4</sub> aqueous solution (2.1 eq., 10 mL, 10 mmol) and THF (16 mL) was heated at 60 °C for 16 h. The reaction mixture was neutralized by addition of 30% NH<sub>4</sub>OH aqueous solution and the solvents were evaporated under reduced pressure. The residue was dissolved in MeOH and the insoluble material was filtered and washed with MeOH. The filtrate was concentrated under reduced pressure to afford **15** (1.13 g, 98%) as an anomeric mixture ( $\alpha/\beta$  1:2.5) and as a white solid. <sup>1</sup>H-NMR (CD<sub>3</sub>OD, 300 MHz) δ 3.19-3.37 (m, 10H; H<sup>β</sup>-2, H<sup>β</sup>-3, H<sup>β</sup>-4, H<sup>β,A</sup>-5), 3.49 (dd, *J* = 8.6, 3.4 Hz, 1H; H<sup>α</sup>-2), 3.52-3.77 (m, 6.5H; H<sup>α</sup>-3, H<sup>α</sup>-4, H<sup>β</sup>-4, C(H<sup>α</sup>)<sub>2</sub>-5), 3.84 (dd, *J* = 11.4, 5.5 Hz, 2.5H; H<sup>β,B</sup>-5), 4.44 (d, *J* = 7.1 Hz, 2.5H; H<sup>β</sup>-1), 4.88-4.91 (m, 7H; OC(H<sup>α</sup>)<sub>2</sub>Ph, OC(H<sup>β</sup>)<sub>2</sub>Ph), 5.03 (d, *J* = 3.5 Hz, 1H; H<sup>α</sup>-1), 7.22-7.48 (m, 17.5H; H<sub>Ar</sub>). <sup>13</sup>C-NMR (CD<sub>3</sub>OD, 100 MHz) δ 63.1 (C<sup>β</sup>-5), 67.1 (C<sup>α</sup>-5), 71.18, 71.24 (C<sup>α</sup>-4, C<sup>β</sup>-4), 73.7 (C<sup>β</sup>-2), 75.8, 75.9 (OC(H<sup>α</sup>)<sub>2</sub>Ph, OC(H<sup>β</sup>)<sub>2</sub>Ph), 76.1 (C<sup>α</sup>-2), 83.2 (C<sup>α</sup>-3), 86.1 (C<sup>β</sup>-3), 94.3 (C<sup>α</sup>-1), 99.0 (C<sup>β</sup>-1), 128.5, 129.1, 129.2 (CH<sub>Ar</sub>), 140.4, 140.5 (C<sub>Ar</sub>). IR (neat) 3340 cm<sup>-1</sup> (O-H). HRMS (ESI) *m/z* calculated for C<sub>12</sub>H<sub>16</sub>O<sub>5</sub>Na : 263.089 [M+Na]<sup>+</sup>; found 263.088.

## Experimental procedures for the synthesis of arms and linkers and analytical data

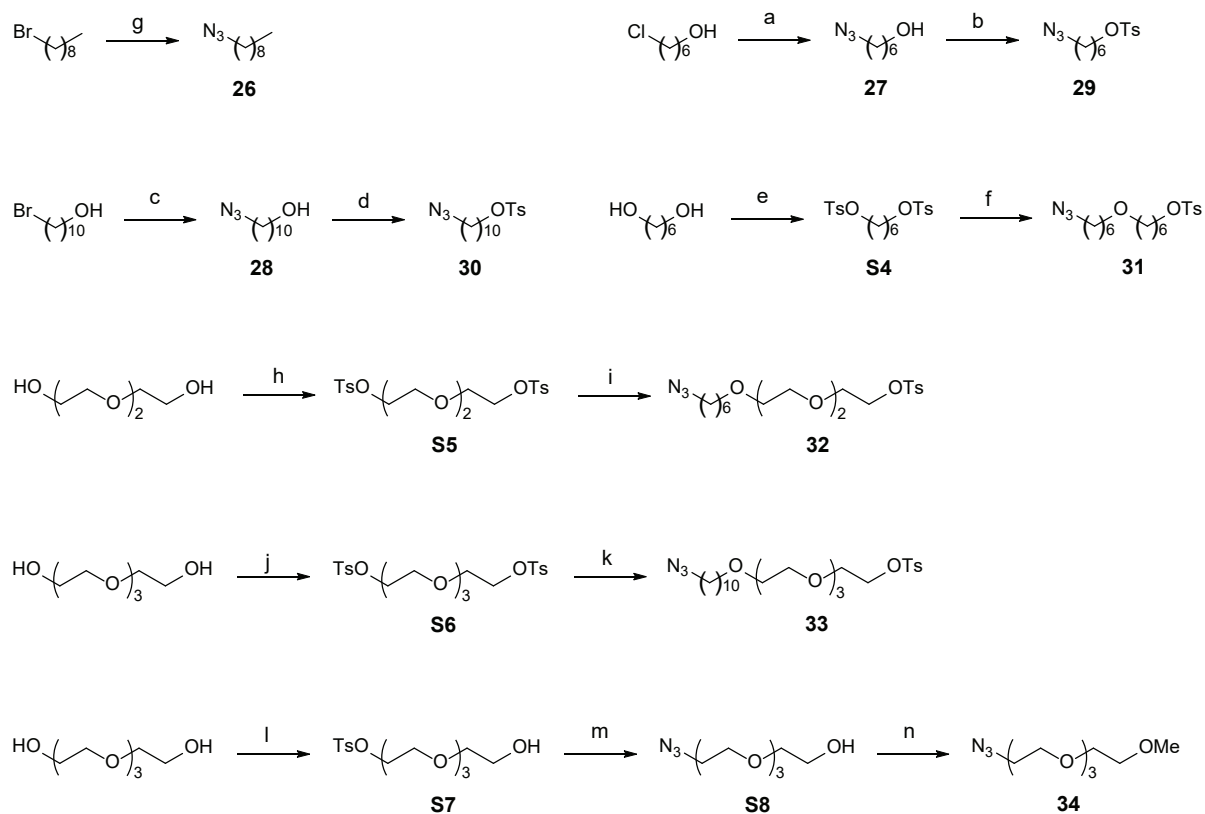

**Scheme S2.** Synthesis of all arms and linkers for the synthesis of heterodimers, dimers and monomers.

(a) NaN<sub>3</sub>, DMF, 50 °C, 18 h, 93%; (b) TsCl, Et<sub>3</sub>N, CH<sub>2</sub>Cl<sub>2</sub>, r.t., 48 h, 86%; (c) NaN<sub>3</sub>, DMF, 60 °C, 17 h, 94%; (d) TsCl, Et<sub>3</sub>N, CH<sub>2</sub>Cl<sub>2</sub>, r.t., 43 h, 72%; (e) TsCl, Et<sub>3</sub>N, DMAP, CH<sub>2</sub>Cl<sub>2</sub>, r.t., 18 h, 87%; (f) **27**, NaH, DMF, 0 °C to r.t., 2 h, 20%; (g) NaN<sub>3</sub>, DMF, 100 °C (μw), 45 min, 91%; (h) TsCl, KOH, CH<sub>2</sub>Cl<sub>2</sub>, 0 °C, 4 h, 95%; (i) **27**, NaH, DMF, r.t., 6 h, 38%; (j) TsCl, KOH, CH<sub>2</sub>Cl<sub>2</sub>, 0 °C, 4 h, 96%; (k) **28**, NaH, DMF, r.t., 22 h, 39%; (l) TsCl, NaOH, THF, 0 °C, 3.5 h, 86%; (m) NaN<sub>3</sub>, EtOH, 70 °C, 18 h, 61%; (n) MeI, NaH, THF, r.t., 18 h, 47%.

### 1-Azidononane (**26**)

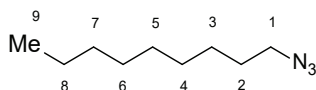

A mixture of 1-bromononane (540 mg, 2.607 mmol) and NaN<sub>3</sub> (1.1 eq., 190 mg, 2.923 mmol) in dry DMF (3 mL) was heated under microwave irradiation at 100 °C for 15 min. Additional NaN<sub>3</sub> (0.9 eq., 152 mg, 2.34 mmol) was added and the reaction mixture was heated under microwave irradiation at 100 °C for another 30 min. The reaction mixture was diluted with Et<sub>2</sub>O and washed with water (3×) and brine. The organic layer was dried over MgSO<sub>4</sub>, filtered and concentrated under reduced pressure. The crude residue was purified by flash column chromatography (CH<sub>2</sub>Cl<sub>2</sub>) to afford **26** (401 mg, 91%) as a colorless oil. The analytical data of **26** are in accordance with literature data.<sup>4</sup> <sup>1</sup>H-NMR (CDCl<sub>3</sub>, 400 MHz) δ 0.88 (t, *J* = 7.0 Hz,

3H; CH<sub>3</sub>-9), 1.24-1.40 (m, 12H; CH<sub>2</sub>-3, CH<sub>2</sub>-4, CH<sub>2</sub>-5, CH<sub>2</sub>-6, CH<sub>2</sub>-7, CH<sub>2</sub>-8), 1.60 (tt, *J* = 7.3, 7.0 Hz, 2H; CH<sub>2</sub>-2), 3.25 (t, *J* = 7.0 Hz, 2H; CH<sub>2</sub>-1).

### 6-Azidohexan-1-ol (27)

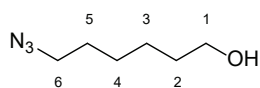

A mixture of 6-chlorohexan-1-ol (2.0 g, 14.64 mmol) and NaN<sub>3</sub> (1.5 eq., 1.43 g, 22.00 mmol) in dry DMF (30 mL) was stirred at 50 °C for 18 h. The solvent was evaporated under reduced pressure and the residue was partitioned between Et<sub>2</sub>O and water. The organic layer was separated and the aqueous layer was extracted with Et<sub>2</sub>O. The combined organic layers were washed with water (3×), dried over MgSO<sub>4</sub>, filtered and concentrated under reduced pressure to afford **27** (1.95 g, 93%) as a colorless oil. The analytical data of **27** are in accordance with literature data.<sup>5</sup> <sup>1</sup>H-NMR (CDCl<sub>3</sub>, 300 MHz) δ 1.34-1.44 (m, 4H; CH<sub>2</sub>-3, CH<sub>2</sub>-4), 1.53-1.65 (m, 5H; CH<sub>2</sub>-2, CH<sub>2</sub>-5, OH), 3.25 (t, *J* = 6.9 Hz, 2H; CH<sub>2</sub>-6), 3.62 (t, *J* = 6.6 Hz, 2H; CH<sub>2</sub>-1).

### 10-Azidodecan-1-ol (28)

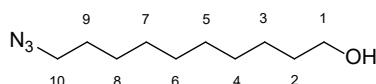

A mixture of 10-bromodecanol (1.28 g, 5.40 mmol) and NaN<sub>3</sub> (2.5 eq., 0.875 g, 13.46 mmol) in dry DMF (13 mL) was stirred at 60 °C for 17 h. The solvent was evaporated under reduced pressure and the residue was partitioned between Et<sub>2</sub>O and water. The organic layer was separated and the aqueous layer was extracted with Et<sub>2</sub>O. The combined organic layers were washed with water (3×), dried over MgSO<sub>4</sub>, filtered and concentrated under reduced pressure. The crude residue was purified by flash column chromatography (AcOEt/Petroleum ether 10:90) to afford **28** (1.01 g, 94%) as a pale yellow oil. The analytical data of **28** are in accordance with literature data.<sup>6</sup> <sup>1</sup>H-NMR (CDCl<sub>3</sub>, 400 MHz) δ 1.26-1.39 (m, 12H; CH<sub>2</sub>-3, CH<sub>2</sub>-4, CH<sub>2</sub>-5, CH<sub>2</sub>-6, CH<sub>2</sub>-7, CH<sub>2</sub>-8), 1.44 (br s, 1H; OH), 1.52-1.62 (m, 4H; CH<sub>2</sub>-2, CH<sub>2</sub>-9), 3.24 (t, *J* = 6.9 Hz, 2H; CH<sub>2</sub>-10), 3.62 (t, *J* = 6.6 Hz, 2H; CH<sub>2</sub>-1).

### 6-Azido-1-(4-methylbenzenesulfonate)hexan-1-ol (29)

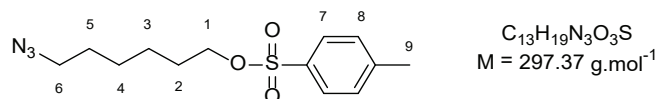

To a solution of **27** (208 mg, 1.453 mmol) and dry Et<sub>3</sub>N (1.2 eq., 0.24 mL, 1.727 mmol) in dry CH<sub>2</sub>Cl<sub>2</sub> (10 mL) at 0 °C was added TsCl (1.2 eq., 333 mg, 1.747 mmol) and the reaction mixture was stirred at room temperature for 25 h. Additional dry Et<sub>3</sub>N (0.5 eq., 0.1 mL, 0.719 mmol) and TsCl (0.5 eq., 139 mg, 0.729 mmol) were added and the reaction mixture was stirred at room temperature for another 23 h. The reaction mixture was washed with water and the aqueous layer was extracted with CH<sub>2</sub>Cl<sub>2</sub> (2×). The combined organic layers were washed with brine, dried over MgSO<sub>4</sub>, filtered and concentrated under reduced pressure. The crude

residue was purified by flash column chromatography (AcOEt/Petroleum ether, 5:95) to afford **29** (372 mg, 86%) as a colorless oil. The analytical data of **29** are in accordance with literature data.<sup>7</sup> <sup>1</sup>H-NMR (CDCl<sub>3</sub>, 400 MHz)  $\delta$  1.28-1.38 (m, 4H; CH<sub>2</sub>-3, CH<sub>2</sub>-4), 1.51-1.58 (m, 2H; CH<sub>2</sub>-5), 1.62-1.68 (m, 2H; CH<sub>2</sub>-2), 2.45 (s, 3H; CH<sub>3</sub>-9), 3.23 (t,  $J$  = 6.9 Hz, 2H; CH<sub>2</sub>-6), 4.02 (t,  $J$  = 6.4 Hz, 2H; CH<sub>2</sub>-1), 7.35 (d,  $J$  = 8.2 Hz, 2H; H-8), 7.79 (d,  $J$  = 8.2 Hz, 2H; H-7).

### 10-Azido-1-(4-methylbenzenesulfonate)decan-1-ol (**30**)

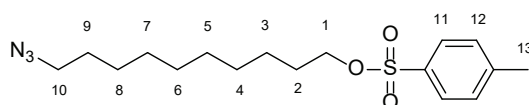

To a solution of **28** (177 mg, 0.888 mmol) and dry Et<sub>3</sub>N (1.7 eq., 0.21 mL, 1.511 mmol) in dry CH<sub>2</sub>Cl<sub>2</sub> (7 mL) at 0 °C was added TsCl (1.7 eq., 289 mg, 1.516 mmol) and the reaction mixture was stirred at room temperature for 18 h. Additional dry Et<sub>3</sub>N (0.5 eq., 0.06 mL, 0.432 mmol) and TsCl (0.5 eq., 85 mg, 0.446 mmol) were added and the reaction mixture was stirred at room temperature for another 25 h. The reaction mixture was washed with water and the aqueous phase was extracted with CH<sub>2</sub>Cl<sub>2</sub> (2×). The combined organic layers were washed with brine, dried over MgSO<sub>4</sub>, filtered and concentrated under reduced pressure. The crude residue was purified by flash column chromatography (AcOEt/Petroleum ether, 2:98) to afford **30** (225 mg, 72%) as a colorless oil. The analytical data of **30** are in accordance with literature data.<sup>8</sup> <sup>1</sup>H-NMR (CDCl<sub>3</sub>, 400 MHz)  $\delta$  1.18-1.39 (m, 12H; CH<sub>2</sub>-3, CH<sub>2</sub>-4, CH<sub>2</sub>-5, CH<sub>2</sub>-6, CH<sub>2</sub>-7, CH<sub>2</sub>-8), 1.55-1.67 (m, 4H; CH<sub>2</sub>-2, CH<sub>2</sub>-9), 2.45 (s, 3H; CH<sub>3</sub>-13), 3.25 (t,  $J$  = 7.0 Hz, 2H; CH<sub>2</sub>-10), 4.02 (t,  $J$  = 6.5 Hz, 2H; CH<sub>2</sub>-1), 7.34 (d,  $J$  = 8.2 Hz, 2H; H-12), 7.79 (d,  $J$  = 8.2 Hz, 2H; H-11).

### 1,6-Bis(4-methylbenzenesulfonate)hexan-1,6-diol (**S4**)

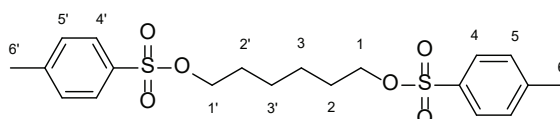

Hexan-1,6-diol (2.0 g, 16.92 mmol), DMAP (0.01 eq., 17 mg, 0.1392 mmol) and dry Et<sub>3</sub>N (5 eq., 11.8 mL, 84.89 mmol) was dissolved in dry CH<sub>2</sub>Cl<sub>2</sub> (34 mL). A solution of TsCl (2.5 eq., 8.07 g, 42.33 mmol) in dry CH<sub>2</sub>Cl<sub>2</sub> (34 mL) was then slowly added over a period of 30 min under vigorously stirring. The reaction mixture was stirred at room temperature for 18 h. The solvent was evaporated under reduced pressure and the crude residue was purified by flash column chromatography (CH<sub>2</sub>Cl<sub>2</sub>/Petroleum ether, 40:60 to 100:0) to afford **S4** (6.27 g, 87%) as a white solid. The analytical data of **S4** are in accordance with literature data.<sup>9</sup> <sup>1</sup>H-NMR (CDCl<sub>3</sub>, 400 MHz)  $\delta$  1.23-1.30 (m, 4H; CH<sub>2</sub>-3, CH<sub>2</sub>-3'), 1.55-1.63 (m, 4H; CH<sub>2</sub>-2, CH<sub>2</sub>-2'), 2.45 (s, 6H; CH<sub>3</sub>-6, CH<sub>3</sub>-6'), 3.98 (t,  $J$  = 6.4 Hz, 4H; CH<sub>2</sub>-1, CH<sub>2</sub>-1'), 7.34 (d,  $J$  = 8.2 Hz, 4H; H-5, H-5'), 7.77 (d,  $J$  = 8.2 Hz, 4H; H-4, H-4').

## Compound 31

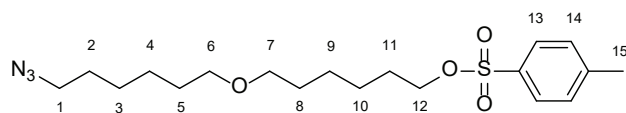

To a stirred solution of **27** (250 mg, 1.746 mmol) in dry DMF (20 mL) at 0 °C was added NaH (4 eq., 279 mg, 6.976 mmol, 60% on mineral oil) portionwise under argon atmosphere. After 30 min stirring at 0 °C, a solution of **S4** (2 eq., 1.49 g, 3.493 mmol) in dry DMF (10 mL) was added dropwise at 0 °C and the reaction mixture was stirred at room temperature for 1 h 30. For quenching, water was added and the solvents were evaporated under reduced pressure. The residue was diluted with AcOEt and washed with water. The aqueous layer was extracted with AcOEt (2×). The combined organic layers were washed with brine, dried over MgSO<sub>4</sub>, filtered and concentrated under reduced pressure. The crude residue was purified by flash column chromatography (AcOEt/Petroleum ether, 10:90) to afford **31** (138 mg, 20%) as a colorless oil. <sup>1</sup>H-NMR (CDCl<sub>3</sub>, 400 MHz) δ 1.20-1.38 (m, 8H; CH<sub>2</sub>-3, CH<sub>2</sub>-4, CH<sub>2</sub>-9, CH<sub>2</sub>-10), 1.43-1.63 (m, 8H; CH<sub>2</sub>-2, CH<sub>2</sub>-5, CH<sub>2</sub>-8, CH<sub>2</sub>-11), 2.40 (s, 3H; CH<sub>3</sub>-15), 3.21 (t, *J* = 6.9 Hz, 2H; CH<sub>2</sub>-1), 3.30 (t, *J* = 6.5 Hz, 2H; CH<sub>2</sub>-6 or CH<sub>2</sub>-7), 3.33 (t, *J* = 6.5 Hz, 2H; CH<sub>2</sub>-6 or CH<sub>2</sub>-7), 3.97 (t, *J* = 6.5 Hz, 2H; CH<sub>2</sub>-12), 7.30 (d, *J* = 8.2 Hz, 2H; H-14), 7.73 (d, *J* = 8.2 Hz, 2H; H-13). <sup>13</sup>C-NMR (CDCl<sub>3</sub>, 100 MHz) δ 21.7 (C-15), 25.3, 25.7, 25.9, 26.7 (C-3, C-4, C-9, C-10), 28.9 (C-2, C-11), 29.6, 29.7 (C-5, C-8), 51.5 (C-1), 70.66 (C-12), 70.71, 70.77 (C-6, C-7), 127.9, 129.9 (4×CH<sub>Ar</sub>), 133.3 (SO<sub>2</sub>-C<sub>Ar</sub>), 144.7 (C<sub>Ar</sub>-CH<sub>3</sub>). IR (neat) 2093 (N<sub>3</sub>), 1359 (SO<sub>2</sub>), 1175 cm<sup>-1</sup> (SO<sub>2</sub>). HRMS (ESI) *m/z* calculated for C<sub>19</sub>H<sub>31</sub>N<sub>3</sub>O<sub>4</sub>SNa : 420.193 [M+Na]<sup>+</sup>; found 420.193.

## Triethylene glycol di(4-methylbenzenesulfonate) (**S5**)

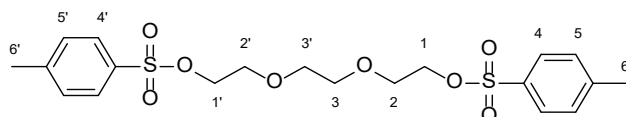

To a solution of triethylene glycol (2.0 g, 13.32 mmol) in CH<sub>2</sub>Cl<sub>2</sub> (15 mL) was added TsCl (2 eq., 5.08 g, 26.65 mmol) and the mixture was cooled to 0 °C. KOH (8 eq., 5.98 g, 106.58 mmol) was carefully added portionwise maintaining the temperature below 5 °C and the reaction mixture was stirred at 0 °C for 4 h. A mixture of ice and water was added, followed by CH<sub>2</sub>Cl<sub>2</sub>. The organic layer was separated and the aqueous layer was extracted with CH<sub>2</sub>Cl<sub>2</sub> (2×). The combined organic layers were washed with brine, dried over Na<sub>2</sub>SO<sub>4</sub>, filtered and concentrated under reduced pressure to afford **S5** (5.81 g, 95%) as a white solid. The analytical data of **S5** are in accordance with literature data.<sup>10</sup> <sup>1</sup>H-NMR (CDCl<sub>3</sub>, 400 MHz) δ 2.44 (s, 6H; CH<sub>3</sub>-6, CH<sub>3</sub>-6'), 3.52 (s, 4H; CH<sub>2</sub>-3, CH<sub>2</sub>-3'), 3.63-3.66 (m, 4H; CH<sub>2</sub>-2, CH<sub>2</sub>-2'), 4.12-4.14 (m, 4H; CH<sub>2</sub>-1, CH<sub>2</sub>-1'), 7.33 (d, *J* = 8.2 Hz, 4H; H-5, H-5'), 7.78 (d, *J* = 8.2 Hz, 4H; H-4, H-4').

## Compound 32

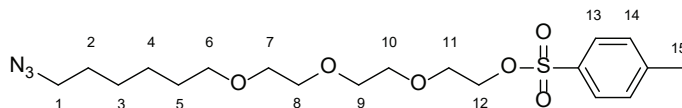

To a stirred solution of **27** (250 mg, 1.746 mmol) and **S5** (2 eq., 1.60 g, 3.489 mmol) in dry DMF (30 mL) was added NaH (4 eq., 279 mg, 6.976 mmol, 60% on mineral oil) portionwise under argon atmosphere. The reaction mixture was stirred at room temperature for 6 h. The solvent was evaporated under reduced pressure and the residue was diluted with CH<sub>2</sub>Cl<sub>2</sub> and washed with water. The aqueous layer was extracted with CH<sub>2</sub>Cl<sub>2</sub> (2×). The combined organic layers were washed with brine, dried over Na<sub>2</sub>SO<sub>4</sub>, filtered and concentrated under reduced pressure. The crude residue was purified by flash column chromatography (AcOEt/Petroleum ether, 30:70) to afford **32** (287 mg, 38%) as a colorless oil. **<sup>1</sup>H-NMR (CDCl<sub>3</sub>, 400 MHz)** δ 1.31-1.40 (m, 4H; CH<sub>2</sub>-3, CH<sub>2</sub>-4), 1.53-1.61 (m, 4H; CH<sub>2</sub>-2, CH<sub>2</sub>-5), 2.42 (s, 3H; CH<sub>3</sub>-15), 3.23 (t, *J* = 7.0 Hz, 2H; CH<sub>2</sub>-1), 3.42 (t, *J* = 6.7 Hz, 2H; CH<sub>2</sub>-6), 3.52-3.59 (m, 8H; CH<sub>2</sub>-7, CH<sub>2</sub>-8, CH<sub>2</sub>-9, CH<sub>2</sub>-10), 3.66 (t, *J* = 4.8 Hz, 2H; CH<sub>2</sub>-11), 4.13 (t, *J* = 4.8 Hz, 2H; CH<sub>2</sub>-12), 7.32 (d, *J* = 8.2 Hz, 2H; H-14), 7.77 (d, *J* = 8.2 Hz, 2H; H-13). **<sup>13</sup>C-NMR (CDCl<sub>3</sub>, 75.5 MHz)** δ 21.7 (C-15), 25.7, 26.6, 28.8, 29.5 (C-2, C-3, C-4, C-5), 51.4 (C-1), 68.7 (C-11), 69.3 (C-12), 70.1, 70.6, 70.7, 70.8 (C-7, C-8, C-9, C-10), 71.3 (C-6), 128.0, 129.9 (4×CH<sub>Ar</sub>), 133.1 (SO<sub>2</sub>-C<sub>Ar</sub>), 144.8 (C<sub>Ar</sub>-CH<sub>3</sub>). **IR (neat)** 2094 (N<sub>3</sub>), 1354 (SO<sub>2</sub>), 1176 cm<sup>-1</sup> (SO<sub>2</sub>). **HRMS (ESI)** *m/z* calculated for C<sub>19</sub>H<sub>31</sub>N<sub>3</sub>O<sub>6</sub>SNa: 452.183 [M+Na]<sup>+</sup>; found 452.185.

## Tetraethylene glycol di(4-methylbenzenesulfonate) (**S6**)

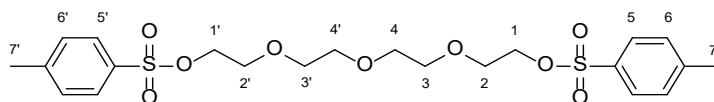

To a solution of tetraethylene glycol (2.0 g, 10.30 mmol) in CH<sub>2</sub>Cl<sub>2</sub> (10 mL) was added TsCl (2 eq., 3.92 g, 20.56 mmol) and the mixture was cooled to 0 °C. KOH (8 eq., 4.62 g, 82.34 mmol) was carefully added portionwise maintaining the temperature below 5 °C and the reaction mixture was stirred at 0 °C for 4 h. A mixture of ice and water was added, followed by CH<sub>2</sub>Cl<sub>2</sub>. The organic layer was separated and the aqueous layer was extracted with CH<sub>2</sub>Cl<sub>2</sub> (2×). The combined organic layers were washed with brine, dried over Na<sub>2</sub>SO<sub>4</sub>, filtered and concentrated under reduced pressure to afford **S6** (4.99 g, 96%) as a colorless oil. The analytical data of **S6** are in accordance with literature data.<sup>11</sup> **<sup>1</sup>H-NMR (CDCl<sub>3</sub>, 400 MHz)** δ 2.43 (s, 6H; CH<sub>3</sub>-7, CH<sub>3</sub>-7'), 3.52-3.57 (m, 8H; CH<sub>2</sub>-3, CH<sub>2</sub>-3', CH<sub>2</sub>-4, CH<sub>2</sub>-4'), 3.65-3.67 (m, 4H; CH<sub>2</sub>-2, CH<sub>2</sub>-2'), 4.12-4.15 (m, 4H; CH<sub>2</sub>-1, CH<sub>2</sub>-1'), 7.32 (d, *J* = 8.2 Hz, 4H; H-6, H-6'), 7.77 (d, *J* = 8.2 Hz, 4H; H-5, H-5').



## Compound 33

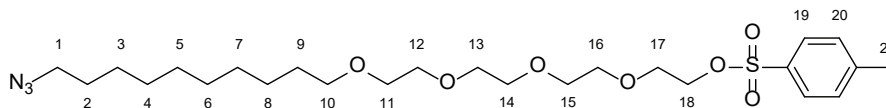

To a stirred solution of **28** (367 mg, 1.842 mmol) and **S6** (2 eq., 1.83 g, 3.641 mmol) in dry DMF (30 mL) was added NaH (4 eq., 295 mg, 7.376 mmol, 60% on mineral oil) portionwise under argon atmosphere. The reaction mixture was stirred at room temperature for 22 h. The solvent was evaporated under reduced pressure and the residue was diluted with CH<sub>2</sub>Cl<sub>2</sub> and washed with water. The aqueous layer was extracted with CH<sub>2</sub>Cl<sub>2</sub> (2×). The combined organic layers were washed with brine, dried over Na<sub>2</sub>SO<sub>4</sub>, filtered and concentrated under reduced pressure. The crude residue was purified by flash column chromatography (AcOEt/Petroleum ether, 40:60) to afford **33** (379 mg, 39%) as a colorless oil. **<sup>1</sup>H-NMR (CDCl<sub>3</sub>, 400 MHz)** δ 1.24-1.38 (m, 12H; CH<sub>2</sub>-3, CH<sub>2</sub>-4, CH<sub>2</sub>-5, CH<sub>2</sub>-6, CH<sub>2</sub>-7, CH<sub>2</sub>-8), 1.52-1.61 (m, 4H; CH<sub>2</sub>-2, CH<sub>2</sub>-9), 2.43 (s, 3H; CH<sub>3</sub>-21), 3.24 (t, *J* = 7.0 Hz, 2H; CH<sub>2</sub>-1), 3.42 (t, *J* = 6.8 Hz, 2H; CH<sub>2</sub>-10), 3.54-3.64 (m, 12H; CH<sub>2</sub>-11, CH<sub>2</sub>-12, CH<sub>2</sub>-13, CH<sub>2</sub>-14, CH<sub>2</sub>-15, CH<sub>2</sub>-16), 3.67 (t, *J* = 4.8 Hz, 2H; CH<sub>2</sub>-17), 4.14 (t, *J* = 4.8 Hz, 2H; CH<sub>2</sub>-18), 7.33 (d, *J* = 8.2 Hz, 2H; H-20), 7.78 (d, *J* = 8.2 Hz, 2H; H-19). **<sup>13</sup>C-NMR (CDCl<sub>3</sub>, 100 MHz)** δ 21.7 (C-21), 26.2, 26.8, 28.9, 29.2, 29.50, 29.52, 29.6, 29.7 (C-2, C-3, C-4, C-5, C-6, C-7, C-8, C-9), 51.6 (C-1), 68.8 (C-17), 69.3 (C-18), 70.1, 70.6, 70.65, 70.70, 70.8 (C-11, C-12, C-13, C-14, C-15, C-16), 71.6 (C-10), 128.1, 129.9 (4×CH<sub>Ar</sub>), 133.0 (SO<sub>2</sub>-C<sub>Ar</sub>), 144.9 (C<sub>Ar</sub>-CH<sub>3</sub>). **IR (neat)** 2094 (N<sub>3</sub>), 1355 (SO<sub>2</sub>), 1176 cm<sup>-1</sup> (SO<sub>2</sub>). **HRMS (ESI)** *m/z* calculated for C<sub>25</sub>H<sub>43</sub>N<sub>3</sub>O<sub>7</sub>SNa : 552.271 [M+Na]<sup>+</sup>; found 552.268.

## Tetraethylene glycol mono(4-methylbenzenesulfonate) (**S7**)

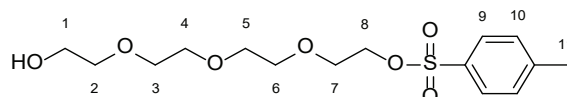

NaOH (1.5 eq., 29 mg, 0.725 mmol) was added to a solution of tetraethylene glycol (10 eq., 1.0 g, 4.802 mmol) in THF (0.3 mL) at 0 °C, followed by slow addition of a solution of TsCl (92 mg, 0.483 mmol) in THF (0.9 mL). The reaction mixture was stirred at 0 °C for 3 h 30. The reaction mixture was poured into a mixture of ice and water. The organic layer was separated and the aqueous layer was extracted with CH<sub>2</sub>Cl<sub>2</sub> (3×). The combined organic layers were washed with water (2×), dried over MgSO<sub>4</sub>, filtered and concentrated under reduced pressure. The crude residue was purified by flash column chromatography (AcOEt/Petroleum ether, 90:10) to afford **S7** (144 mg, 86%) as a colorless oil. The analytical data of **S7** are in accordance with literature data.<sup>12</sup> **<sup>1</sup>H-NMR (CDCl<sub>3</sub>, 400 MHz)** δ 2.27 (br s, 1H; OH), 2.44 (s, 3H; CH<sub>3</sub>-11), 3.58-3.72 (m, 14H; CH<sub>2</sub>-1, CH<sub>2</sub>-2, CH<sub>2</sub>-3, CH<sub>2</sub>-4, CH<sub>2</sub>-5, CH<sub>2</sub>-6, CH<sub>2</sub>-7), 4.15-4.17 (m, 2H; CH<sub>2</sub>-8), 7.34 (d, *J* = 8.2 Hz, 2H; H-10), 7.80 (d, *J* = 8.2 Hz, 2H; H-9).

## 2-[2-[2-(2-Azidoethoxy)ethoxy]ethoxy]ethanol (**S8**)

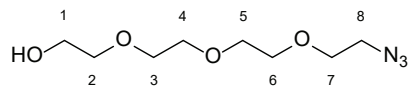

A mixture of **S7** (136 mg, 0.390 mmol) and  $\text{NaN}_3$  (5 eq., 127 mg, 1.952 mmol) in EtOH (3 mL) was stirred at 70 °C for 18 h. The reaction was quenched by addition of water (2 mL). The solvents were evaporated under reduced pressure and the residue was partitioned between water and AcOEt. The organic layer was separated and the aqueous layer was extracted with AcOEt (3×). The combined organic layers were dried over  $\text{MgSO}_4$ , filtered and concentrated under reduced pressure. The crude residue was purified by flash column chromatography (AcOEt) to afford **S8** (52 mg, 61%) as a colorless oil. The analytical data of **S8** are in accordance with literature data.<sup>12</sup>  $^1\text{H-NMR}$  ( $\text{CDCl}_3$ , 400 MHz)  $\delta$  2.68 (br s, 1H; OH), 3.36 (t,  $J = 5.1$  Hz, 2H;  $\text{CH}_2$ -8), 3.56-3.58 (m, 2H;  $\text{CH}_2$ -7), 3.62-3.65 (m, 10H;  $\text{CH}_2$ -2,  $\text{CH}_2$ -3,  $\text{CH}_2$ -4,  $\text{CH}_2$ -5,  $\text{CH}_2$ -6), 3.67-3.70 (m, 2H;  $\text{CH}_2$ -1).

## 1-Azido-2-[2-[2-(2-methoxyethoxy)ethoxy]ethoxy]ethane (**34**)

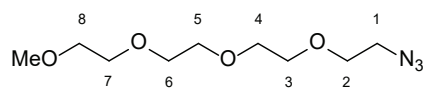

To a stirred suspension of NaH (2 eq., 37 mg, 0.925 mmol, 60% on mineral oil) in dry THF (3.6 mL) was added a solution of **S8** (100 mg, 0.456 mmol) in dry THF (1.2 mL). After 30 min stirring at room temperature, MeI (10.6 eq., 0.30 mL, 4.819 mmol) was added and stirring was prolonged for 18 h. The reaction mixture was diluted with  $\text{Et}_2\text{O}$  and washed with water and brine. The organic layer was dried over  $\text{MgSO}_4$ , filtered and concentrated under reduced pressure. The crude residue was purified by flash column chromatography ( $\text{CH}_2\text{Cl}_2/\text{MeOH}$ , 100:0 to 98:2) to afford **34** (50 mg, 47%) as a colorless oil. The analytical data of **34** are in accordance with literature data.<sup>13</sup>  $^1\text{H-NMR}$  ( $\text{CDCl}_3$ , 400 MHz)  $\delta$  3.33-3.37 (m, 5H;  $\text{CH}_2$ -1,  $\text{OCH}_3$ ), 3.50-3.52 (m, 2H;  $\text{CH}_2$ -2), 3.60-3.66 (m, 12H;  $\text{CH}_2$ -3,  $\text{CH}_2$ -4,  $\text{CH}_2$ -5,  $\text{CH}_2$ -6,  $\text{CH}_2$ -7,  $\text{CH}_2$ -8).

## Copies of NMR Spectra

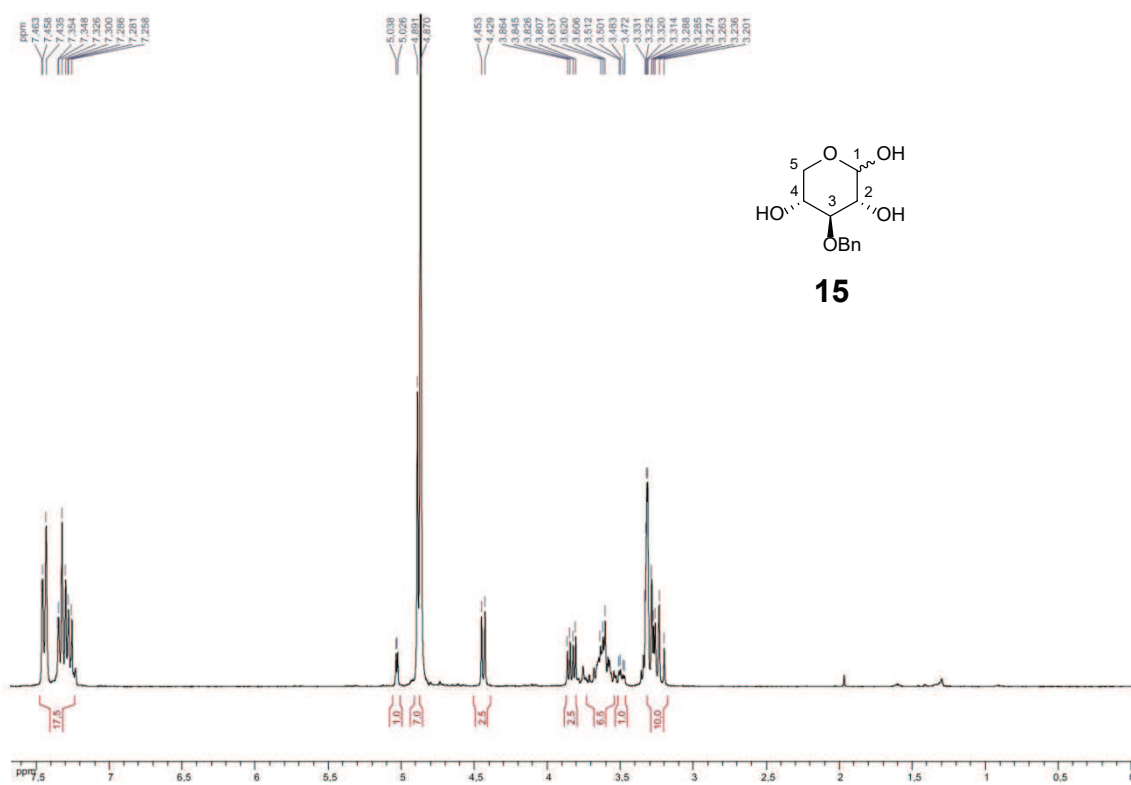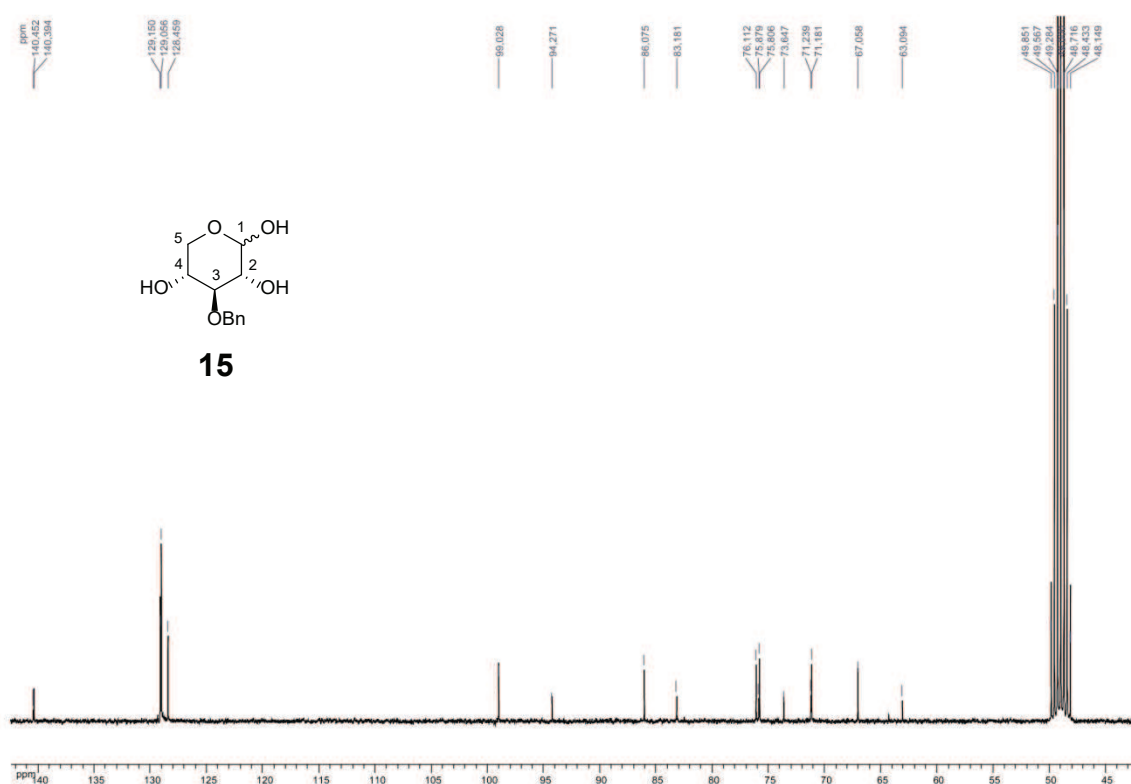

**Fig S1.** <sup>1</sup>H NMR (300 MHz, CD<sub>3</sub>OD) and <sup>13</sup>C (100 MHz, CD<sub>3</sub>OD) spectra of compound **15**.

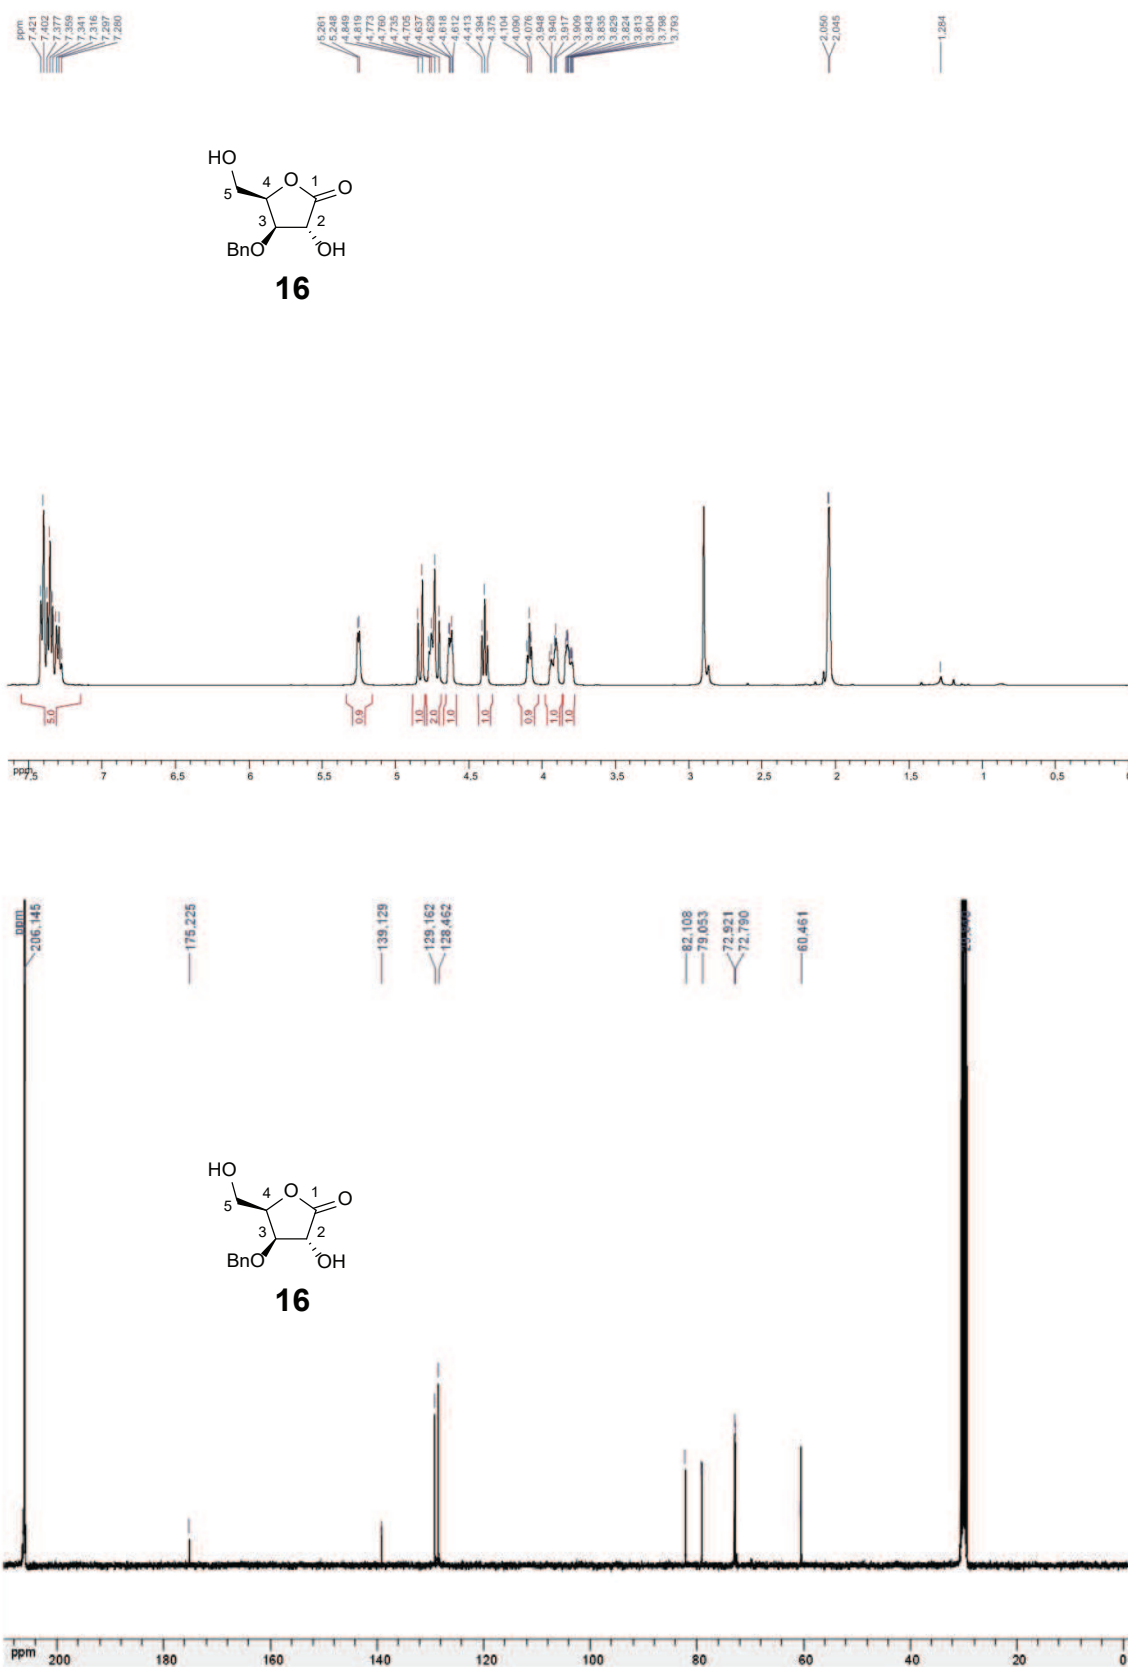

**Fig S2.** <sup>1</sup>H NMR (300 MHz, Acetone-*d*<sub>6</sub>) and <sup>13</sup>C (100 MHz, Acetone-*d*<sub>6</sub>) spectra of compound **16**.

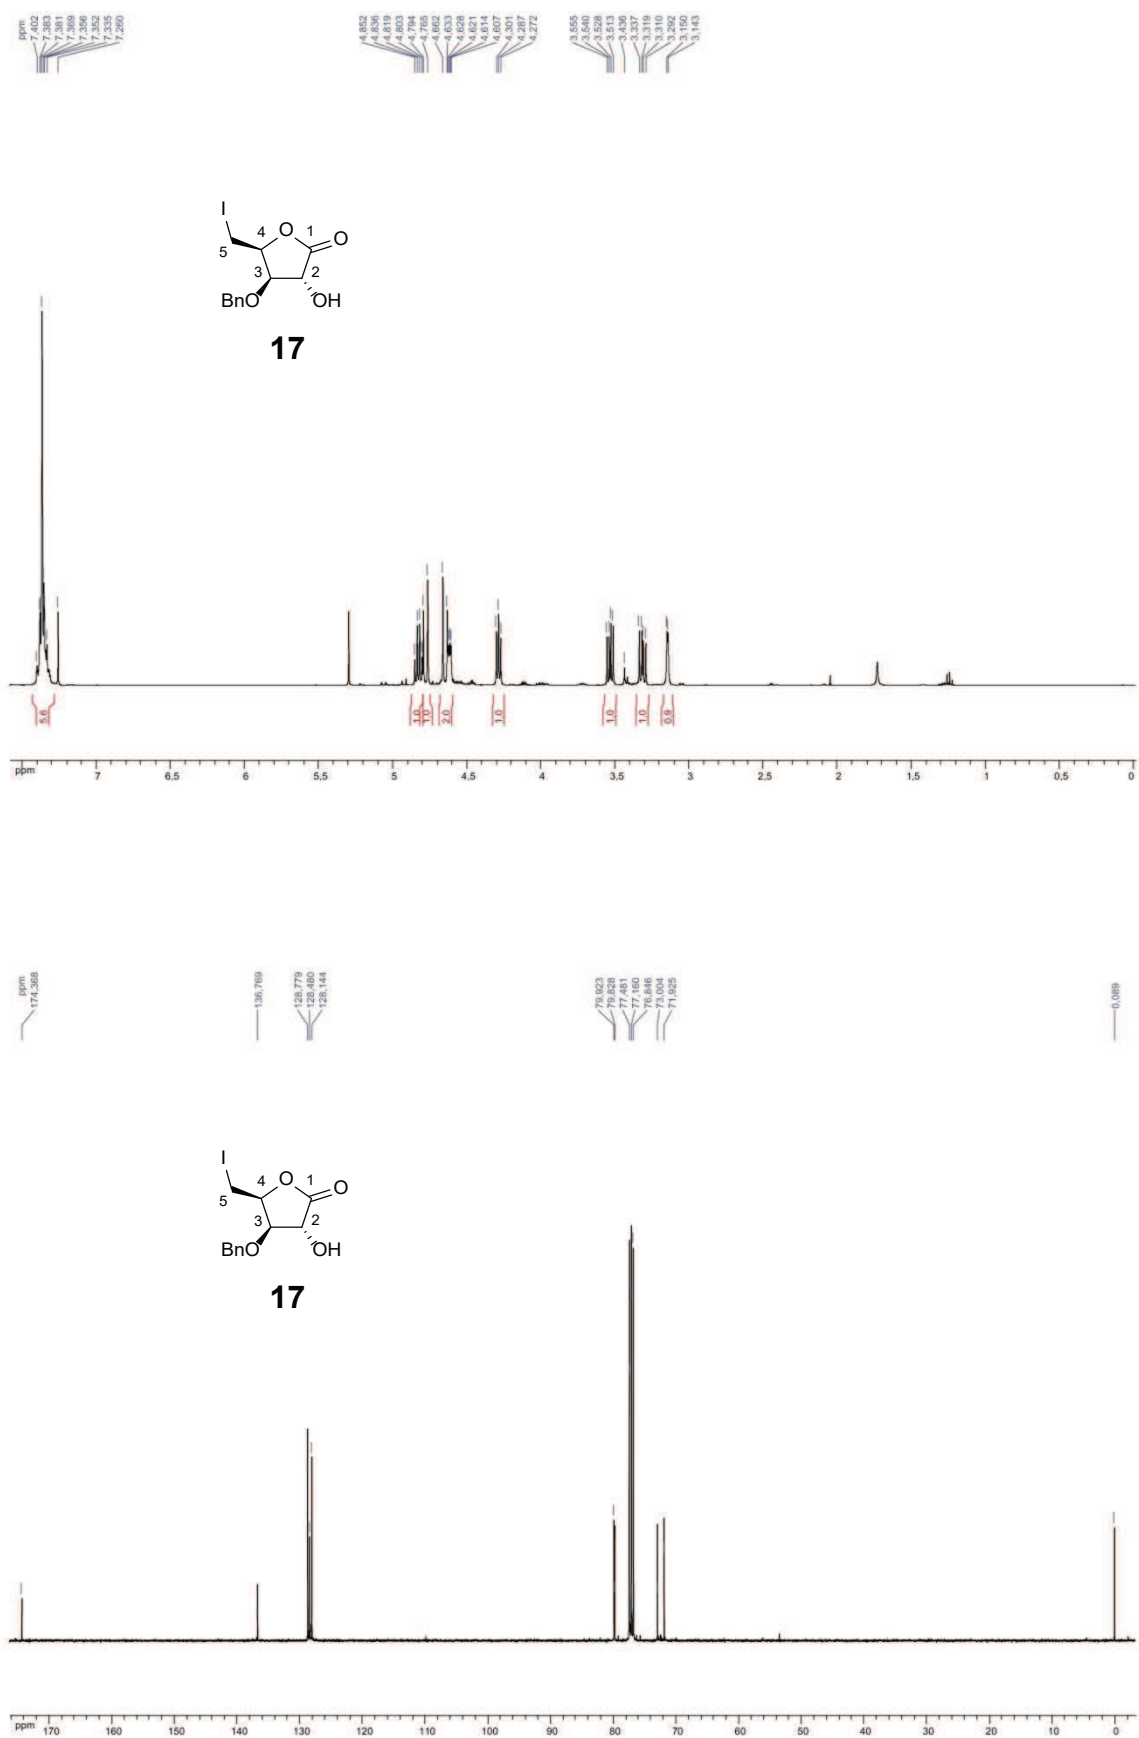

**Fig S3.** <sup>1</sup>H NMR (400 MHz, CDCl<sub>3</sub>) and <sup>13</sup>C (100 MHz, CDCl<sub>3</sub>) spectra of compound **17**.

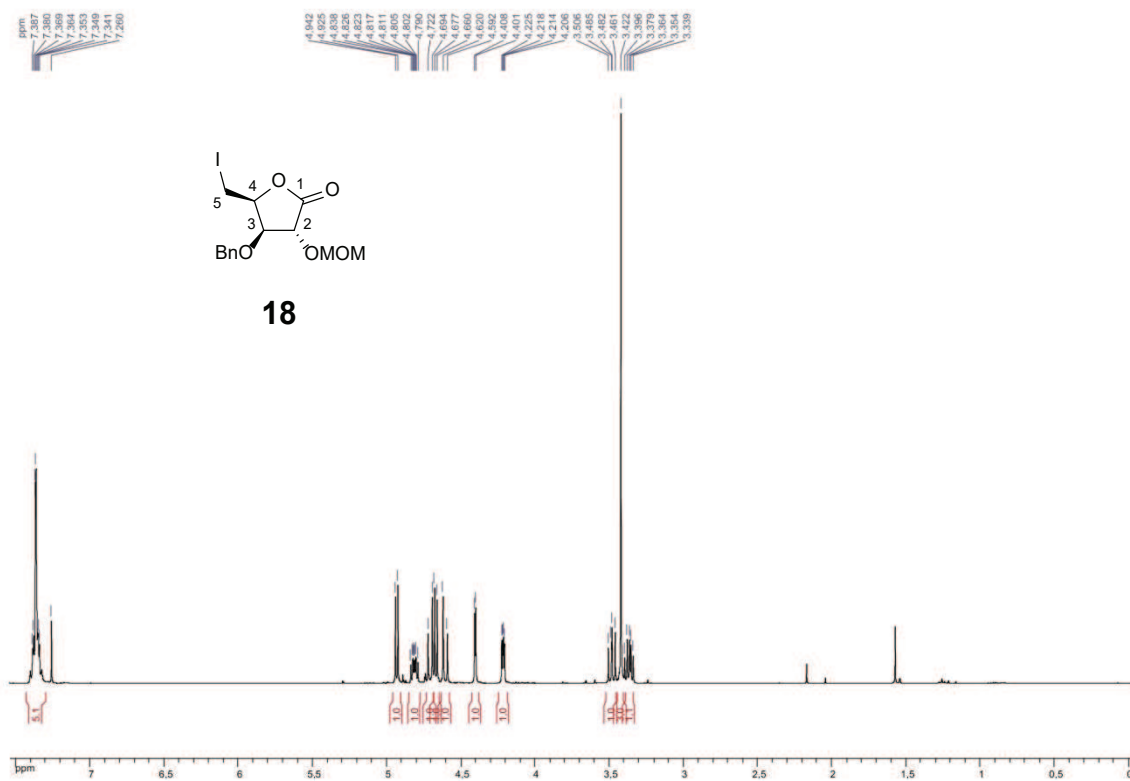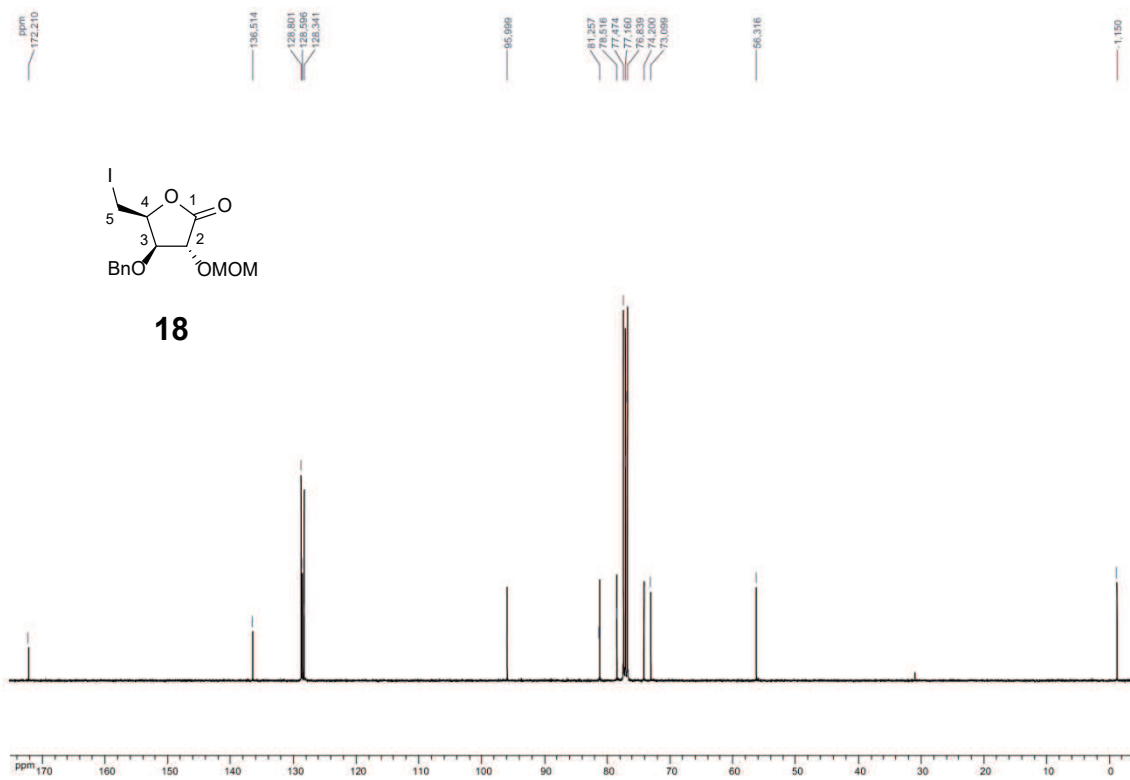

**Fig S4.** <sup>1</sup>H NMR (400 MHz, CDCl<sub>3</sub>) and <sup>13</sup>C (100 MHz, CDCl<sub>3</sub>) spectra of compound **18**.

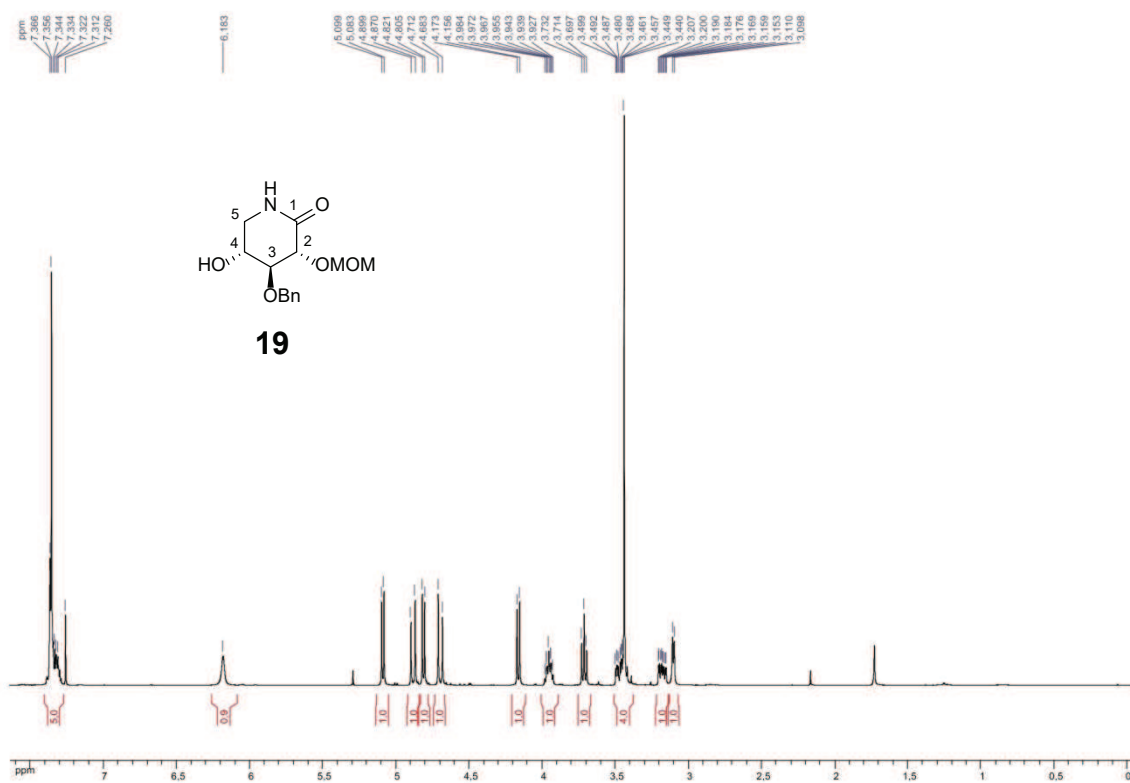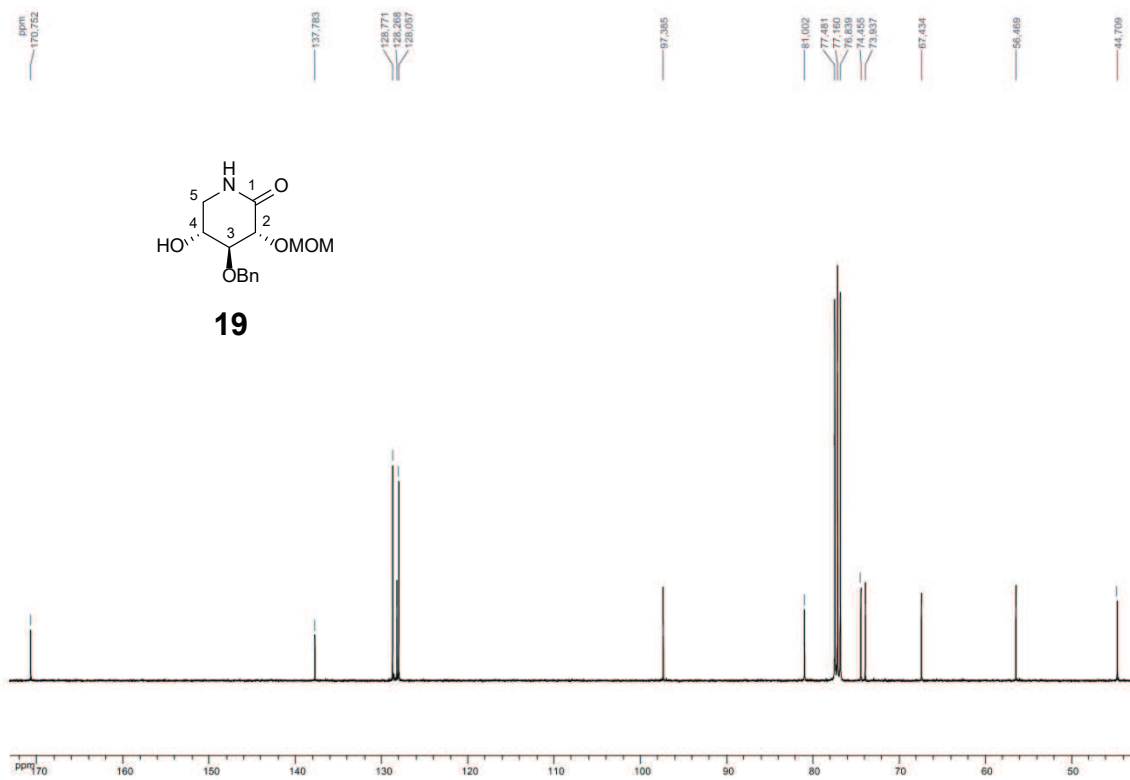

**Fig S5.** <sup>1</sup>H NMR (400 MHz, CDCl<sub>3</sub>) and <sup>13</sup>C (100 MHz, CDCl<sub>3</sub>) spectra of compound **19**.



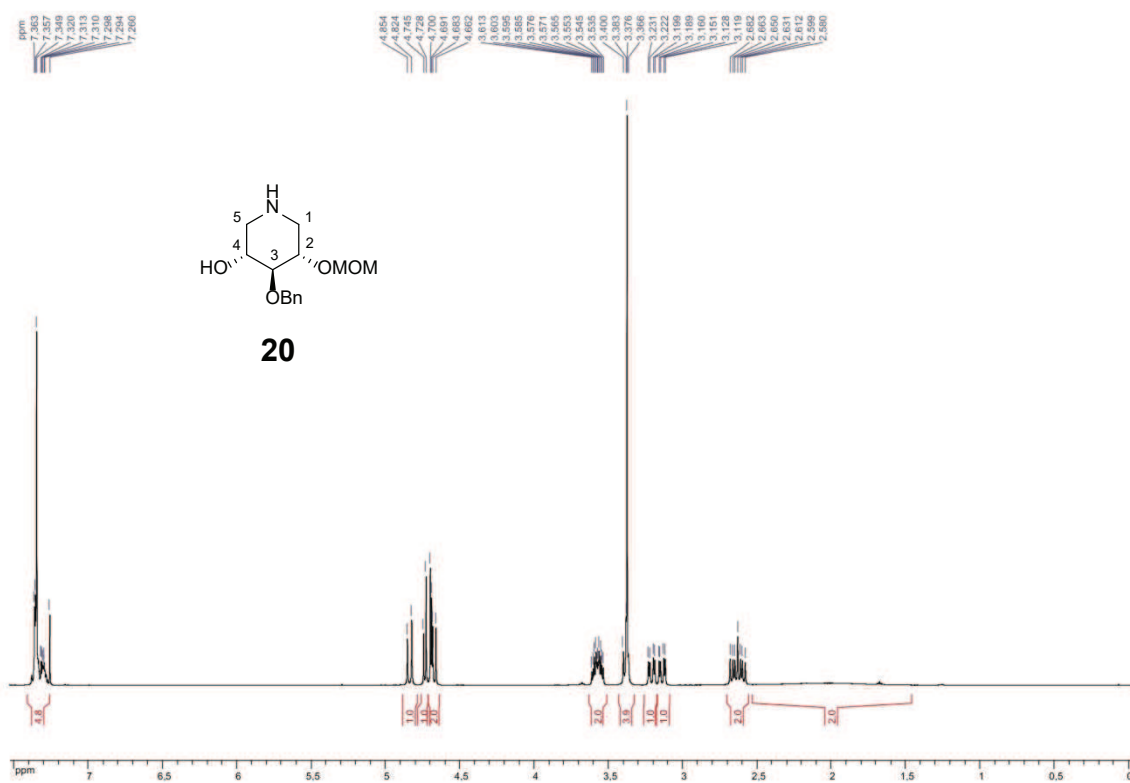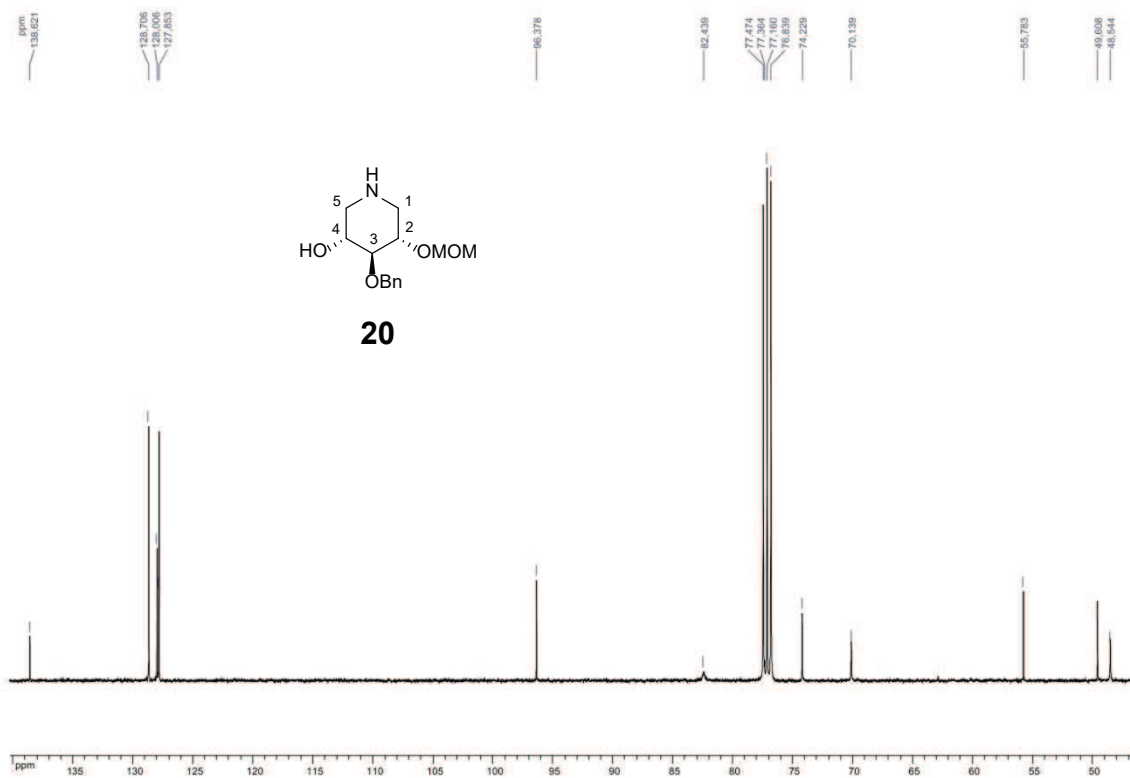

**Fig S6.** <sup>1</sup>H NMR (400 MHz, CDCl<sub>3</sub>) and <sup>13</sup>C (100 MHz, CDCl<sub>3</sub>) spectra of compound **20**.

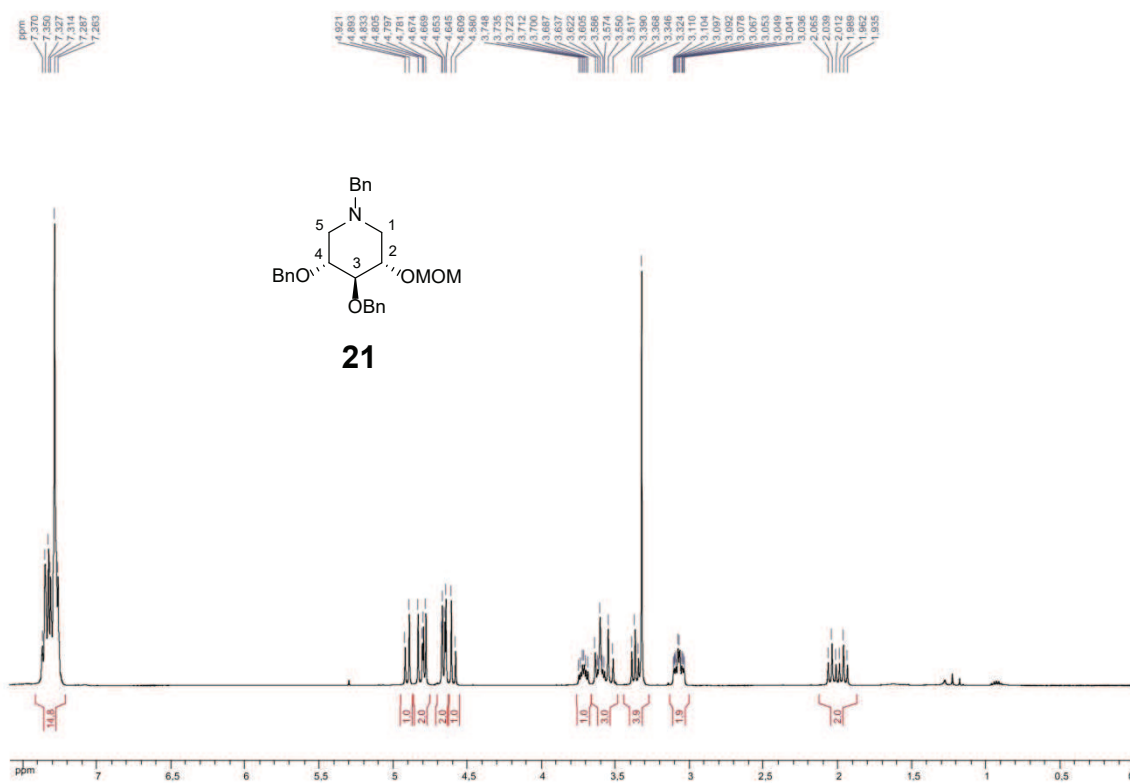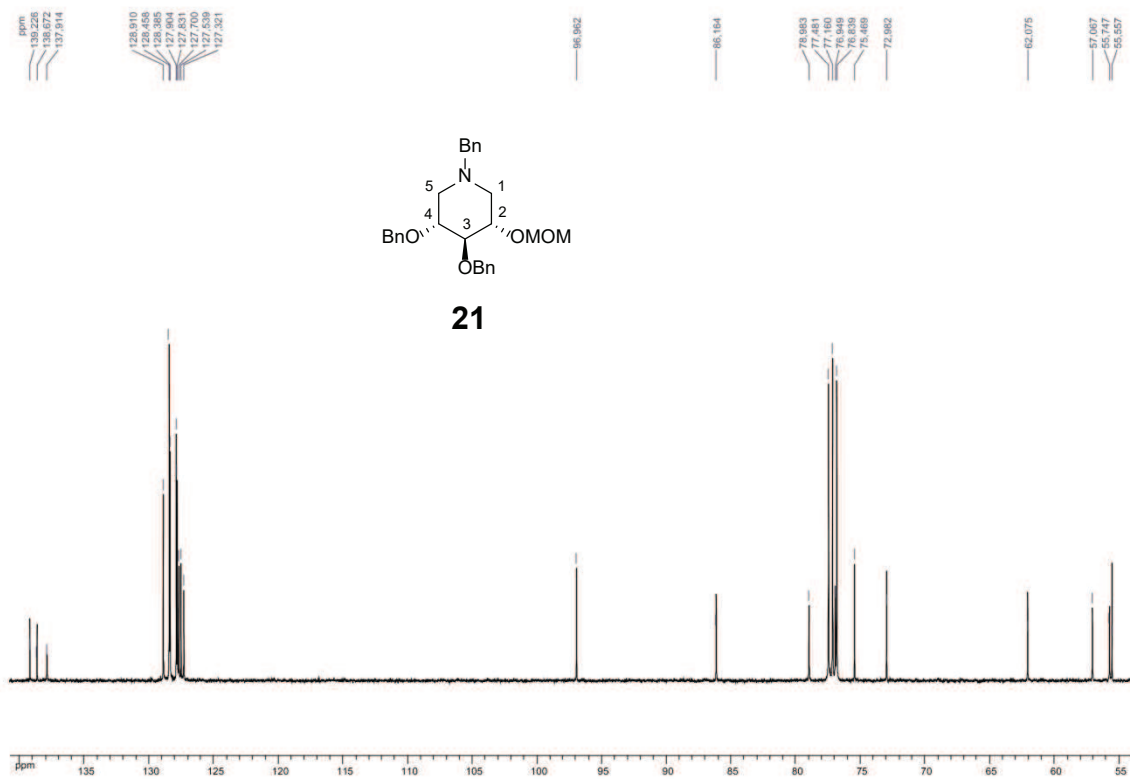

**Fig S7.** <sup>1</sup>H NMR (400 MHz, CDCl<sub>3</sub>) and <sup>13</sup>C (100 MHz, CDCl<sub>3</sub>) spectra of compound **21**.

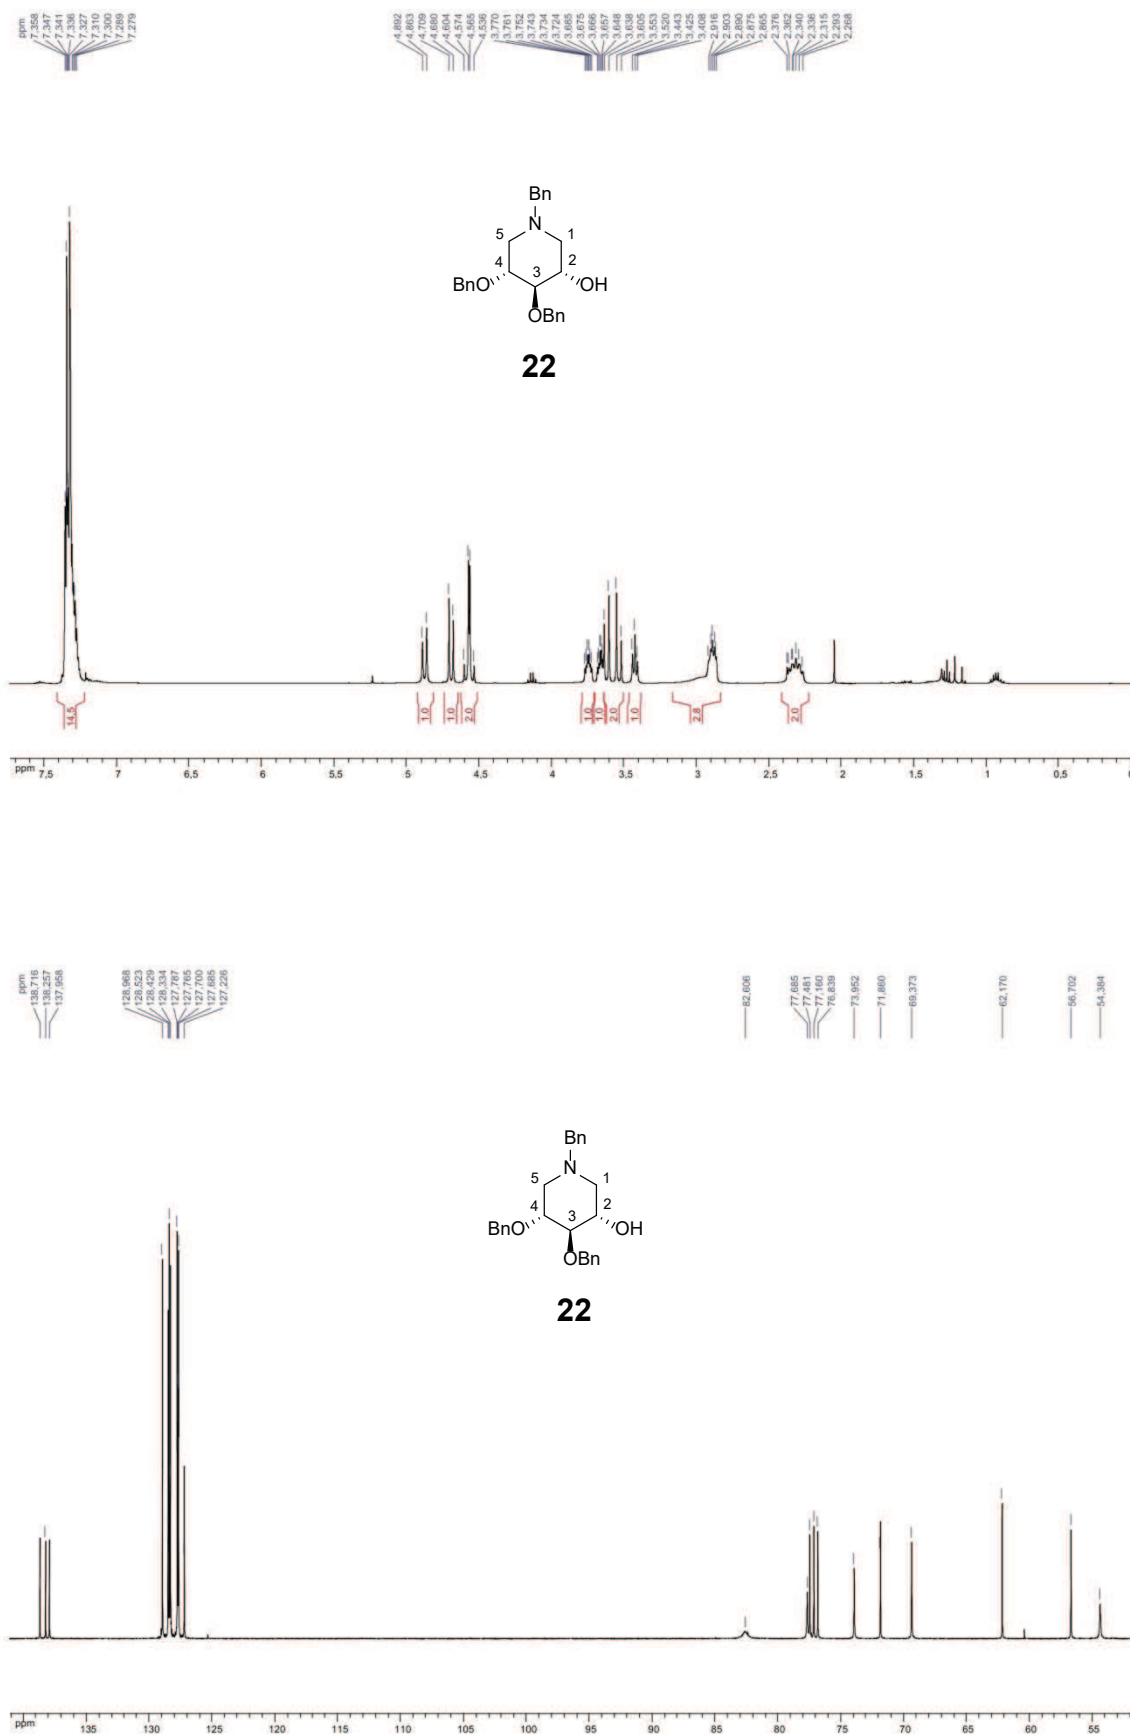

**Fig S8.** <sup>1</sup>H NMR (400 MHz, CDCl<sub>3</sub>) and <sup>13</sup>C (100 MHz, CDCl<sub>3</sub>) spectra of compound **22**.

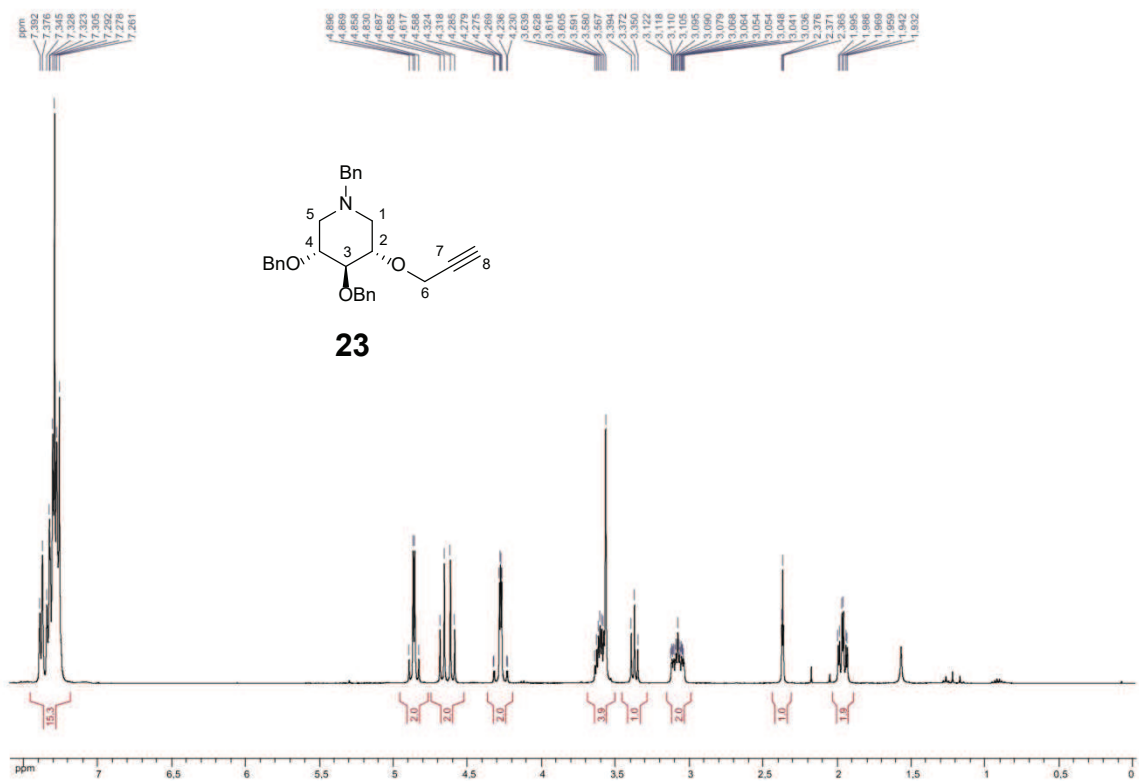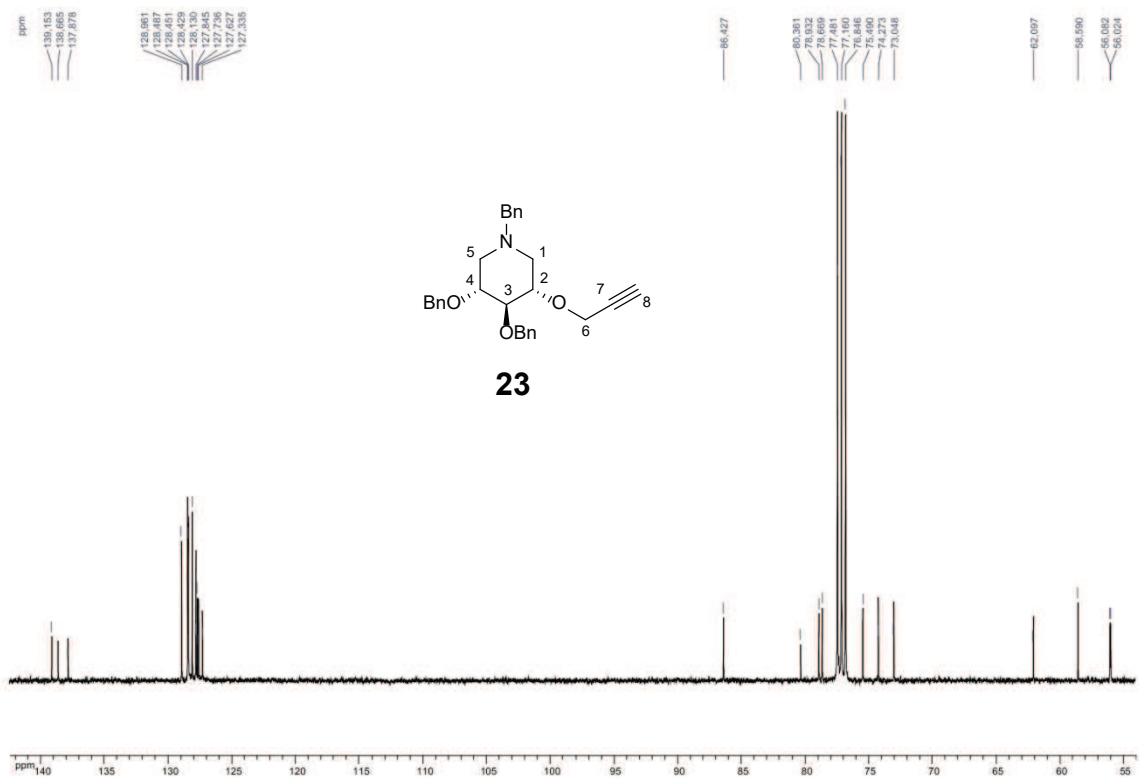

**Fig S9.**  $^1\text{H}$  NMR (400 MHz, CDCl<sub>3</sub>) and  $^{13}\text{C}$  (100 MHz, CDCl<sub>3</sub>) spectra of compound **23**.

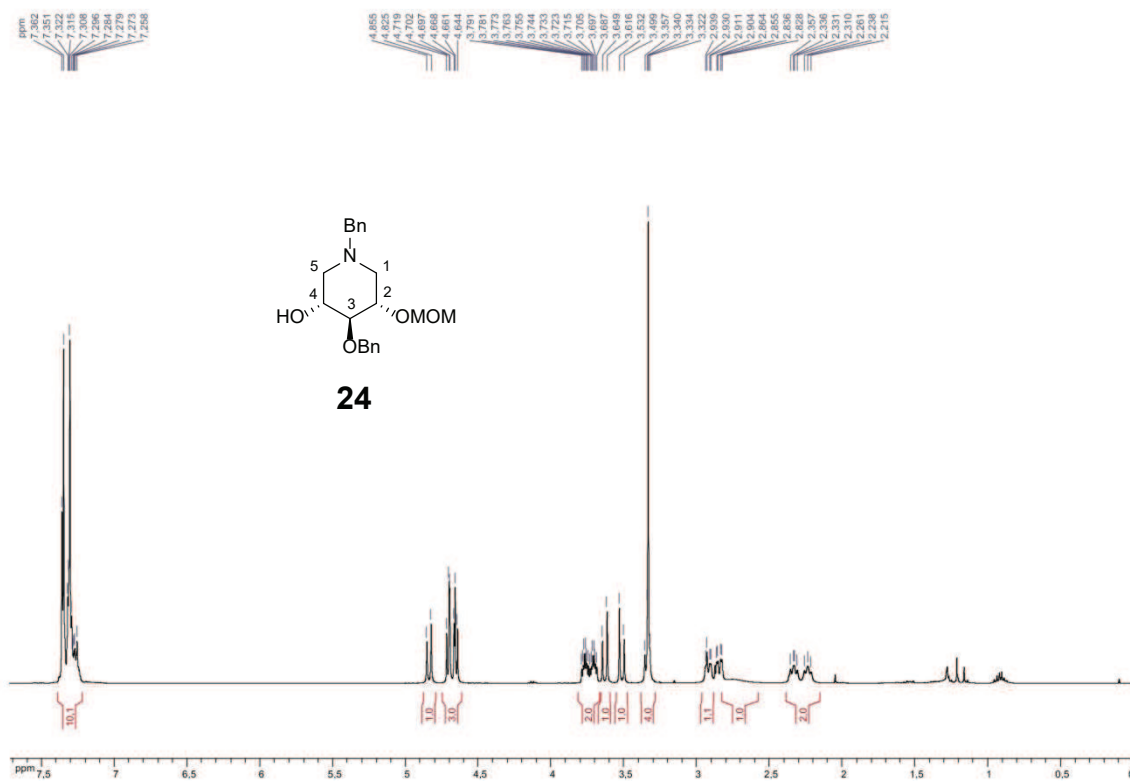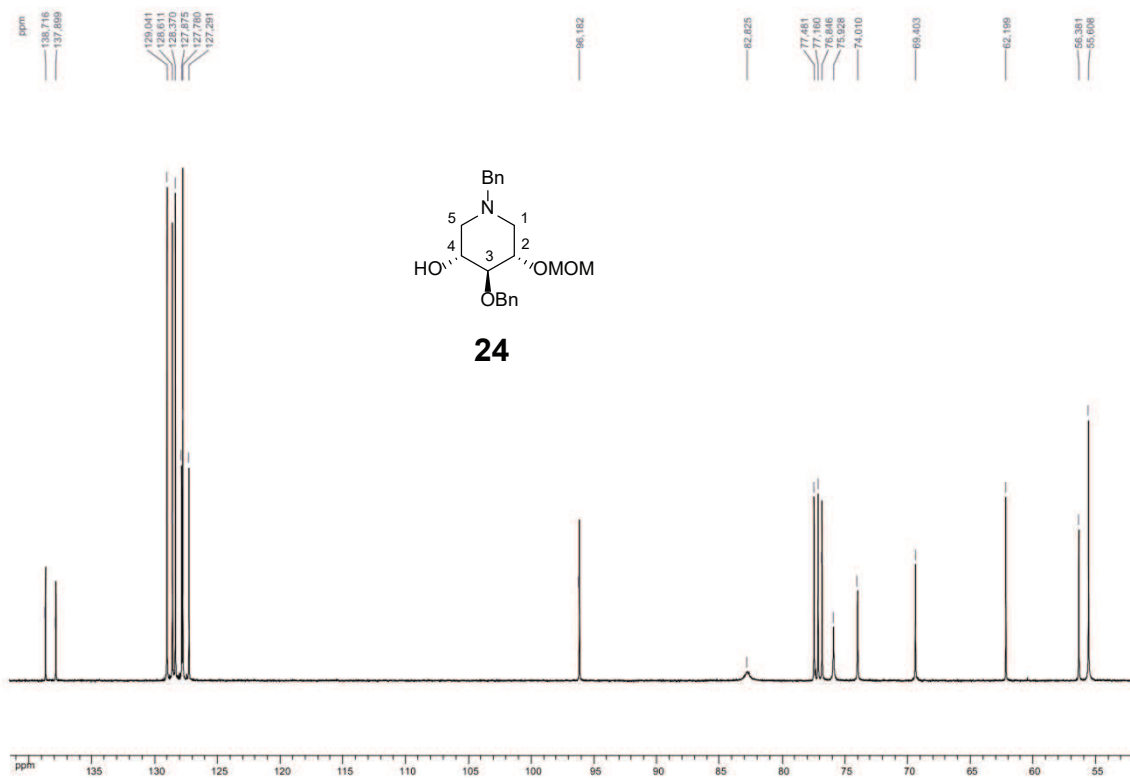

**Fig S10.** <sup>1</sup>H NMR (400 MHz, CDCl<sub>3</sub>) and <sup>13</sup>C (100 MHz, CDCl<sub>3</sub>) spectra of compound **24**.

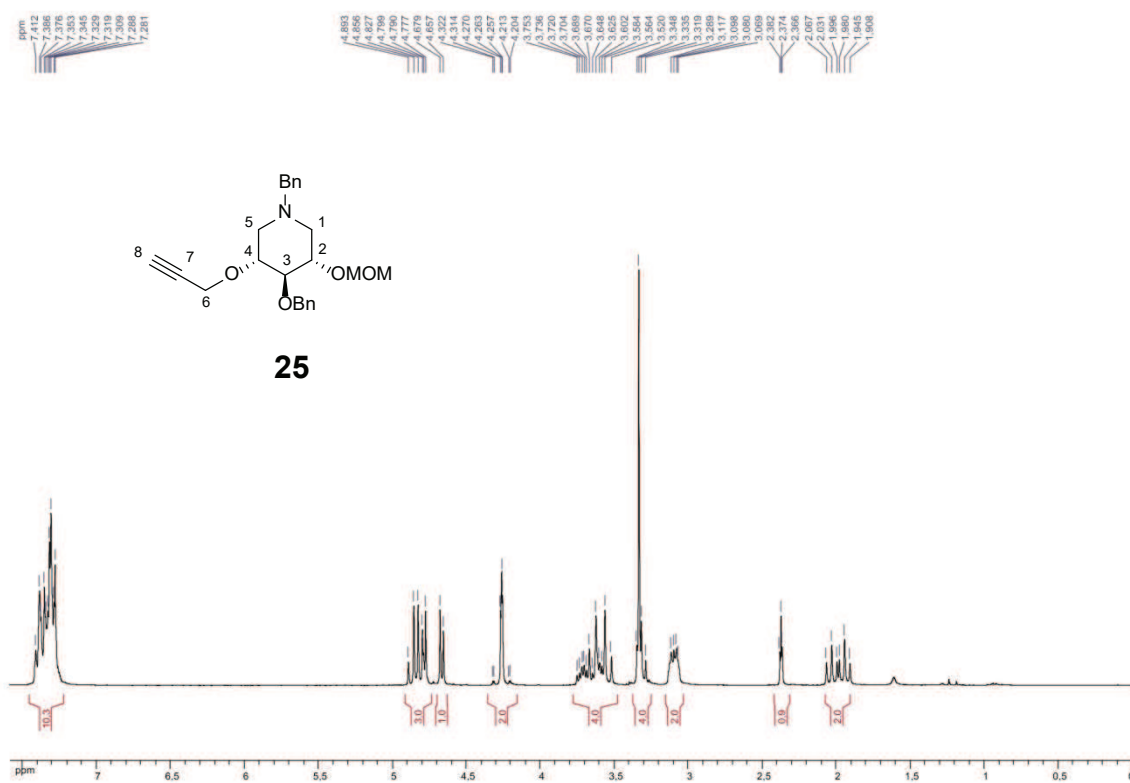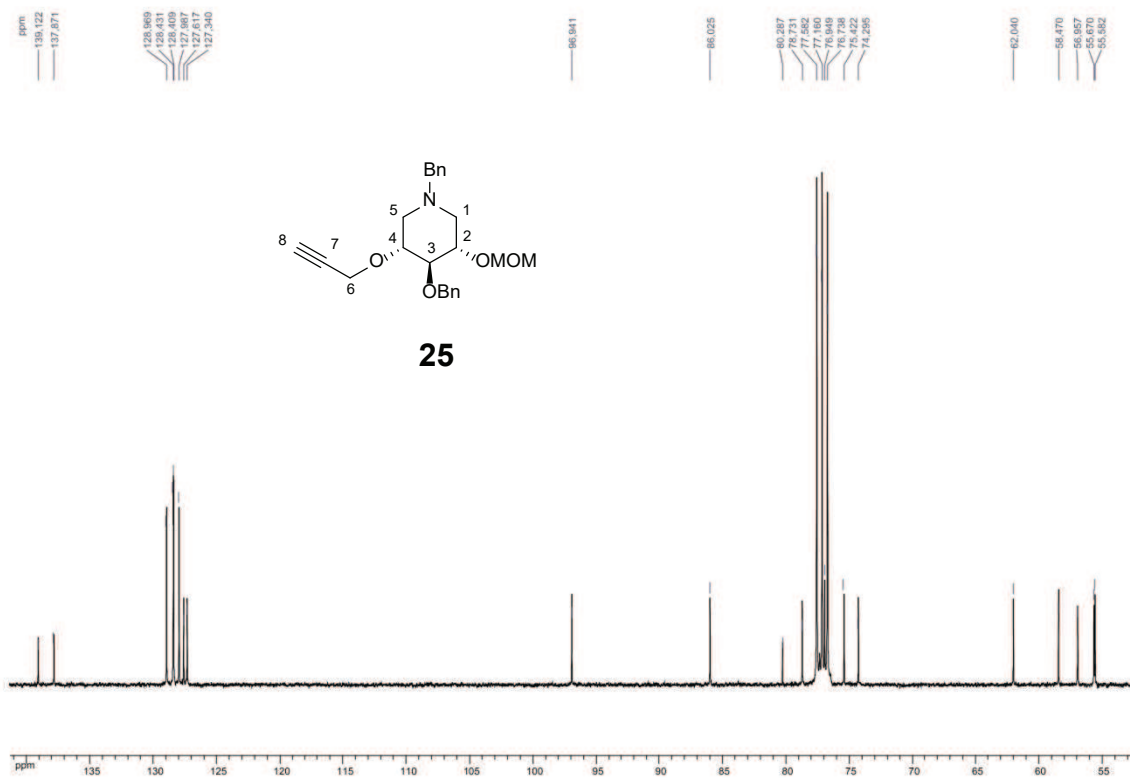

**Fig S11.**  $^1\text{H}$  NMR (300 MHz,  $\text{CDCl}_3$ ) and  $^{13}\text{C}$  (75.5MHz,  $\text{CDCl}_3$ ) spectra of compound **25**.

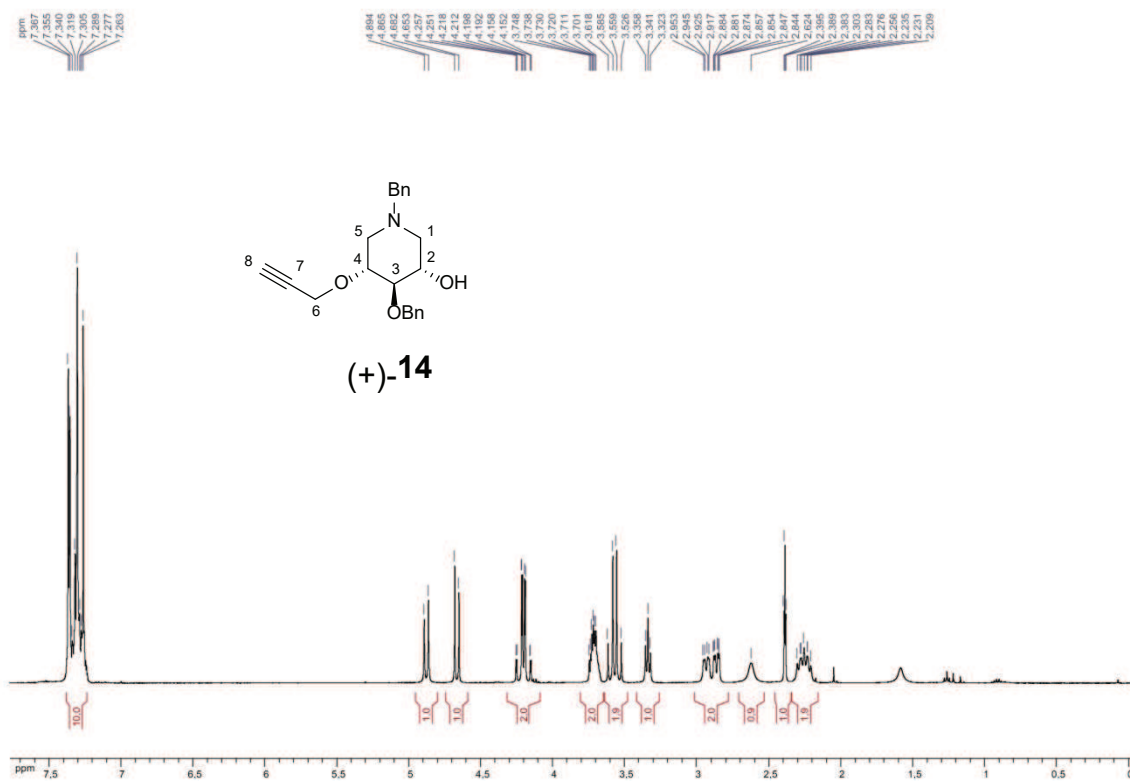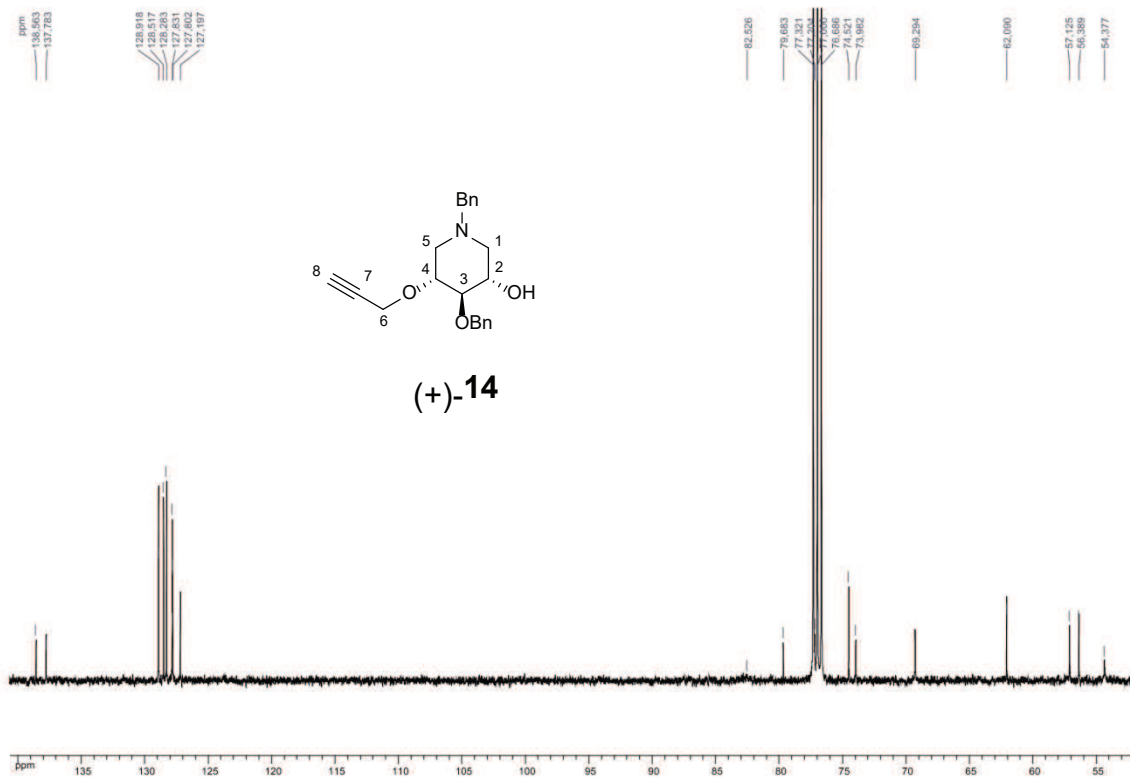

Fig S12. <sup>1</sup>H NMR (400 MHz, CDCl<sub>3</sub>) and <sup>13</sup>C (100 MHz, CDCl<sub>3</sub>) spectra of compound (+)-14.



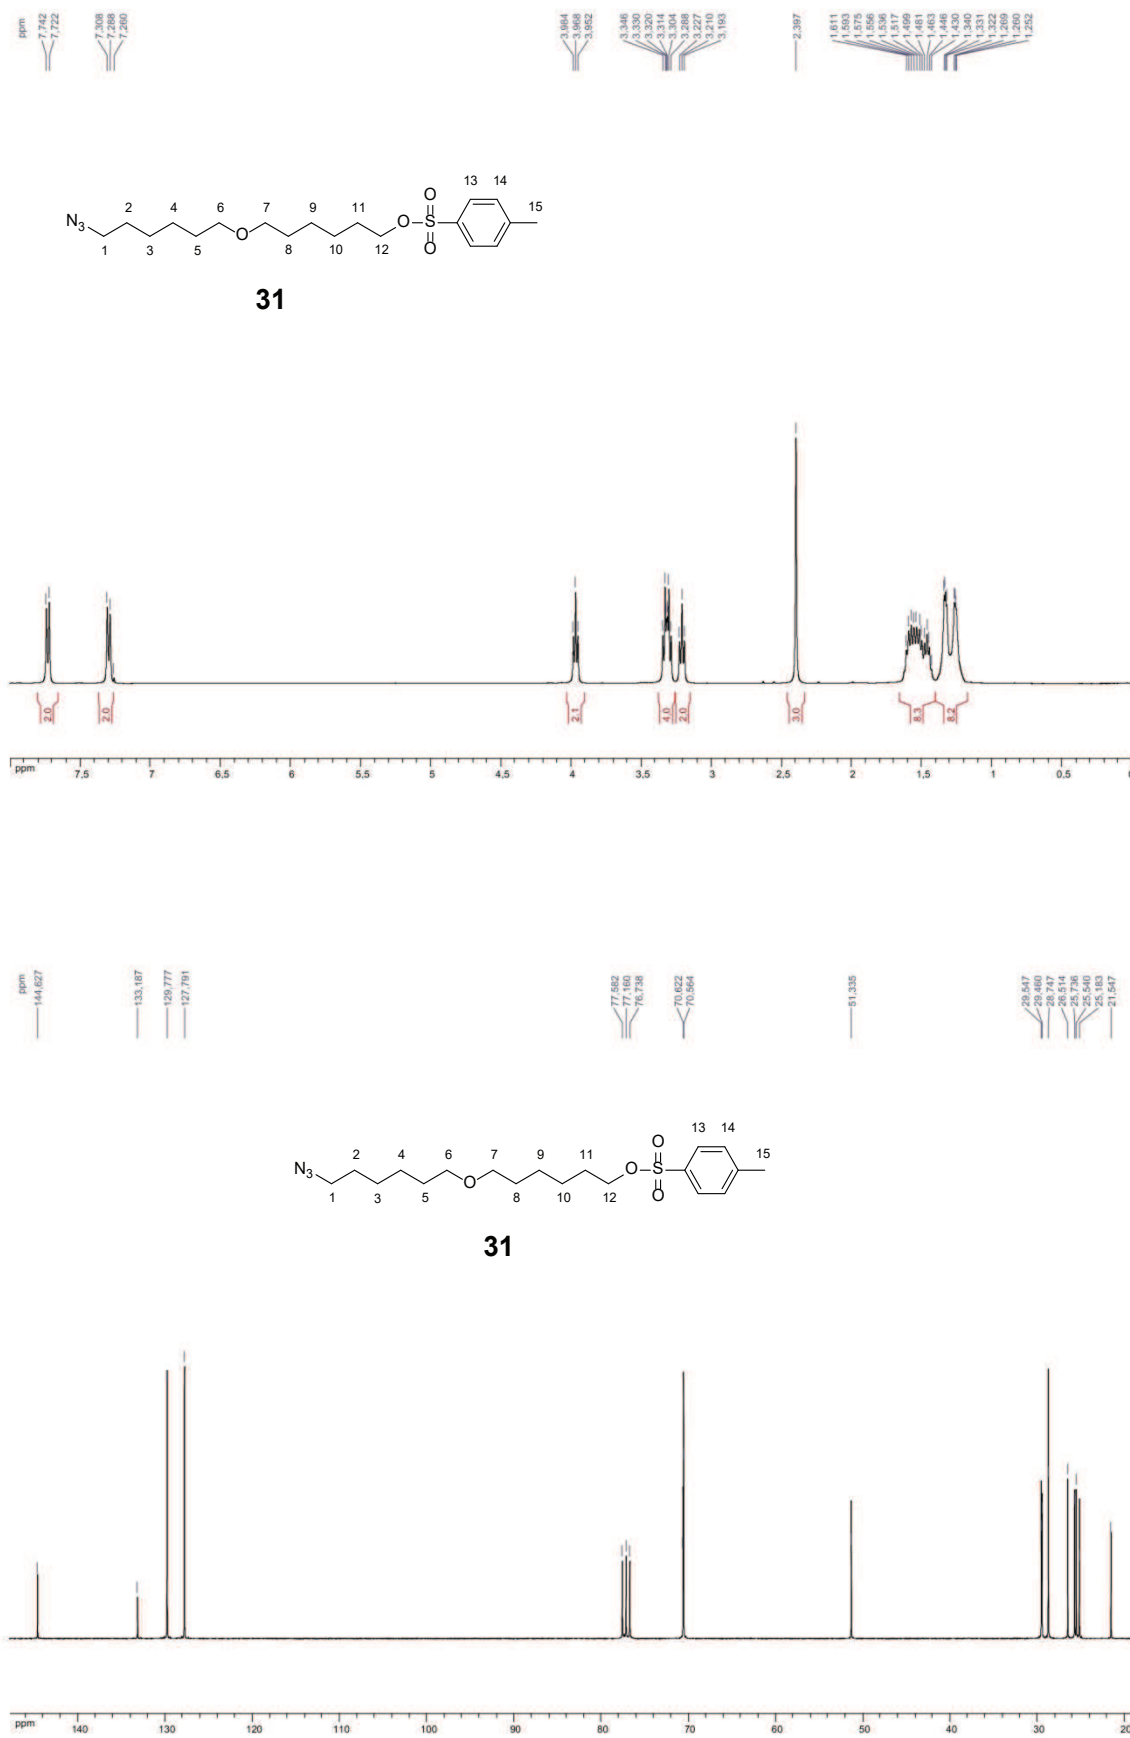

**Fig S13.** <sup>1</sup>H NMR (400 MHz, CDCl<sub>3</sub>) and <sup>13</sup>C (100 MHz, CDCl<sub>3</sub>) spectra of compound **31**.

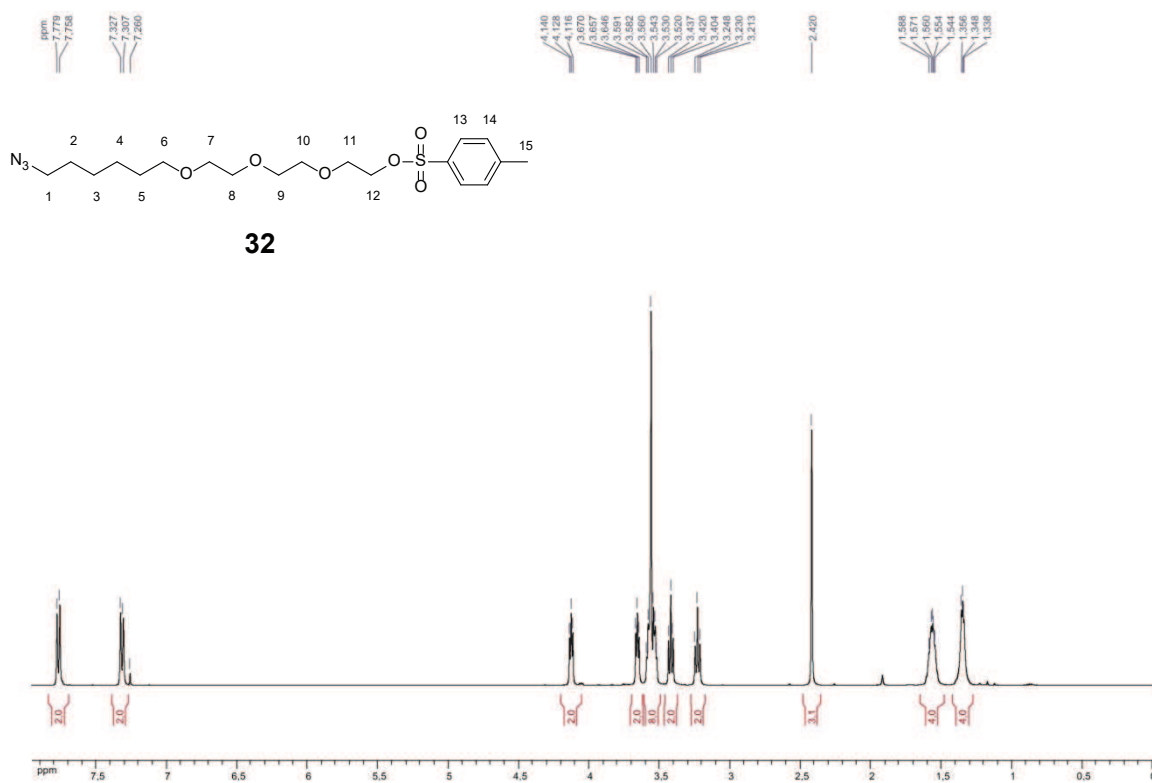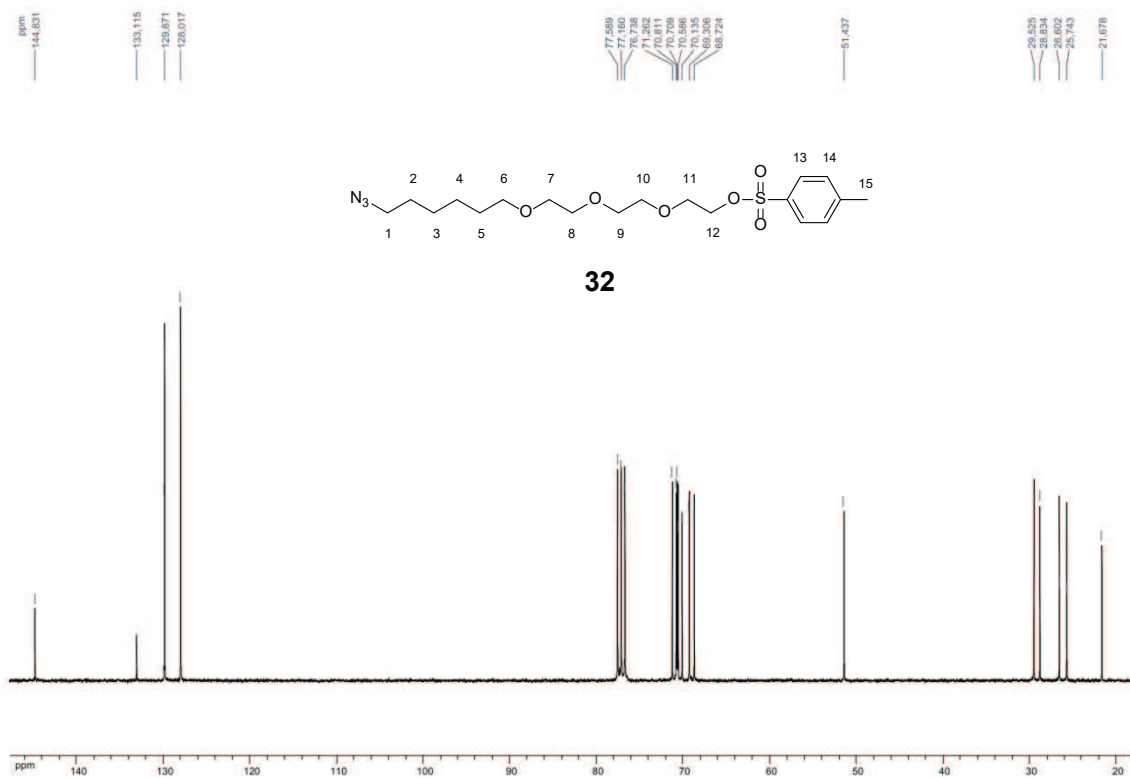

**Fig S14.** <sup>1</sup>H NMR (400 MHz, CDCl<sub>3</sub>) and <sup>13</sup>C (75.5 MHz, CDCl<sub>3</sub>) spectra of compound **32**.

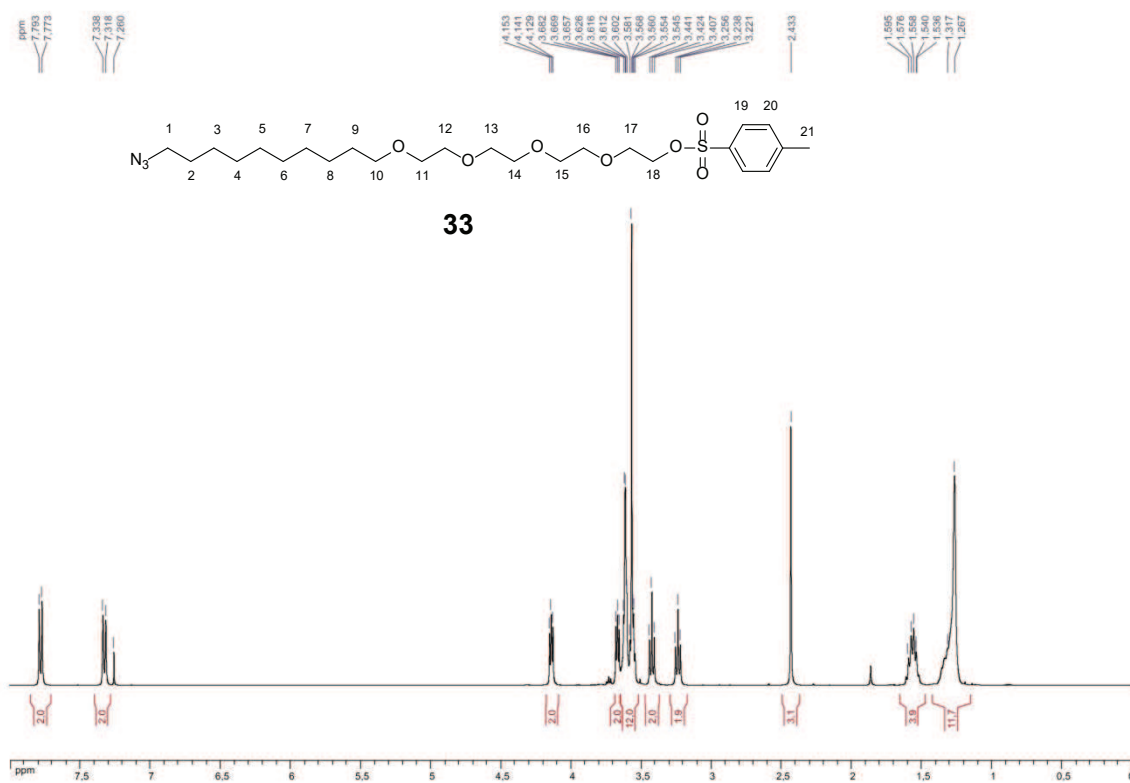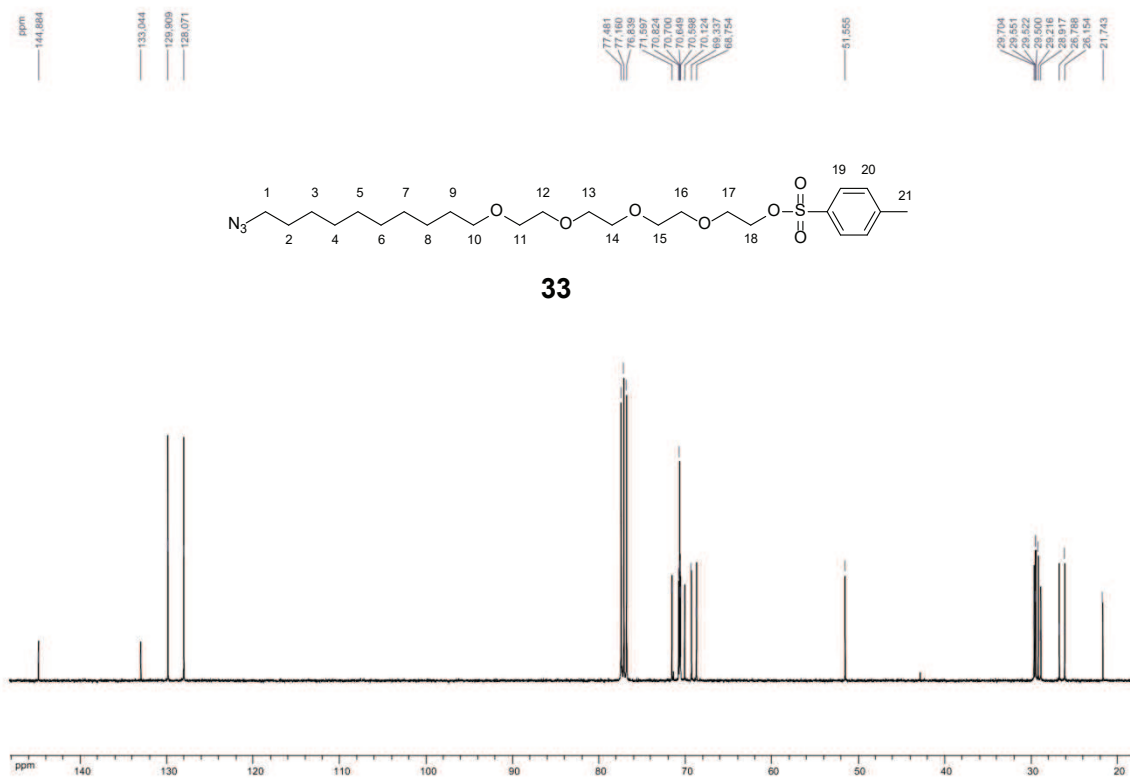

**Fig S15.** <sup>1</sup>H NMR (400 MHz, CDCl<sub>3</sub>) and <sup>13</sup>C (100 MHz, CDCl<sub>3</sub>) spectra of compound **33**.

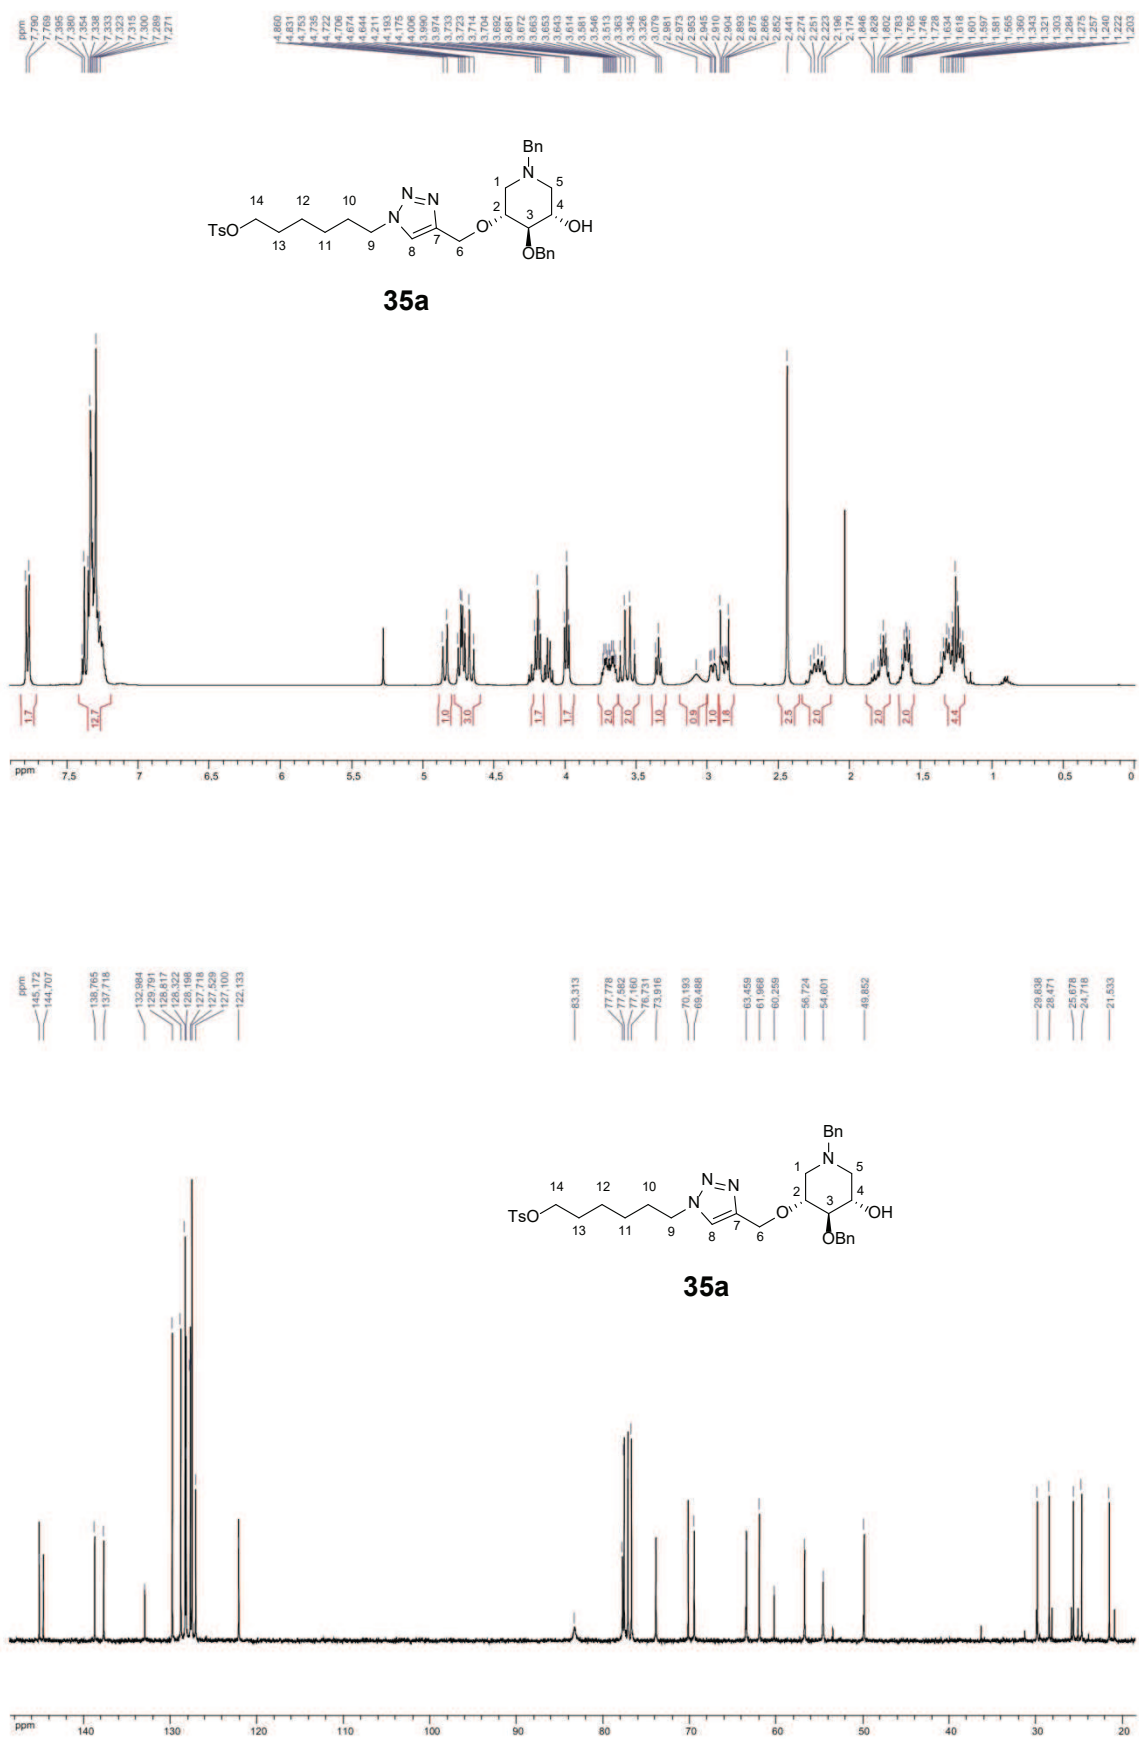

**Fig S16.** <sup>1</sup>H NMR (400 MHz, CDCl<sub>3</sub>) and <sup>13</sup>C (75.5 MHz, CDCl<sub>3</sub>) spectra of compound **35a**.

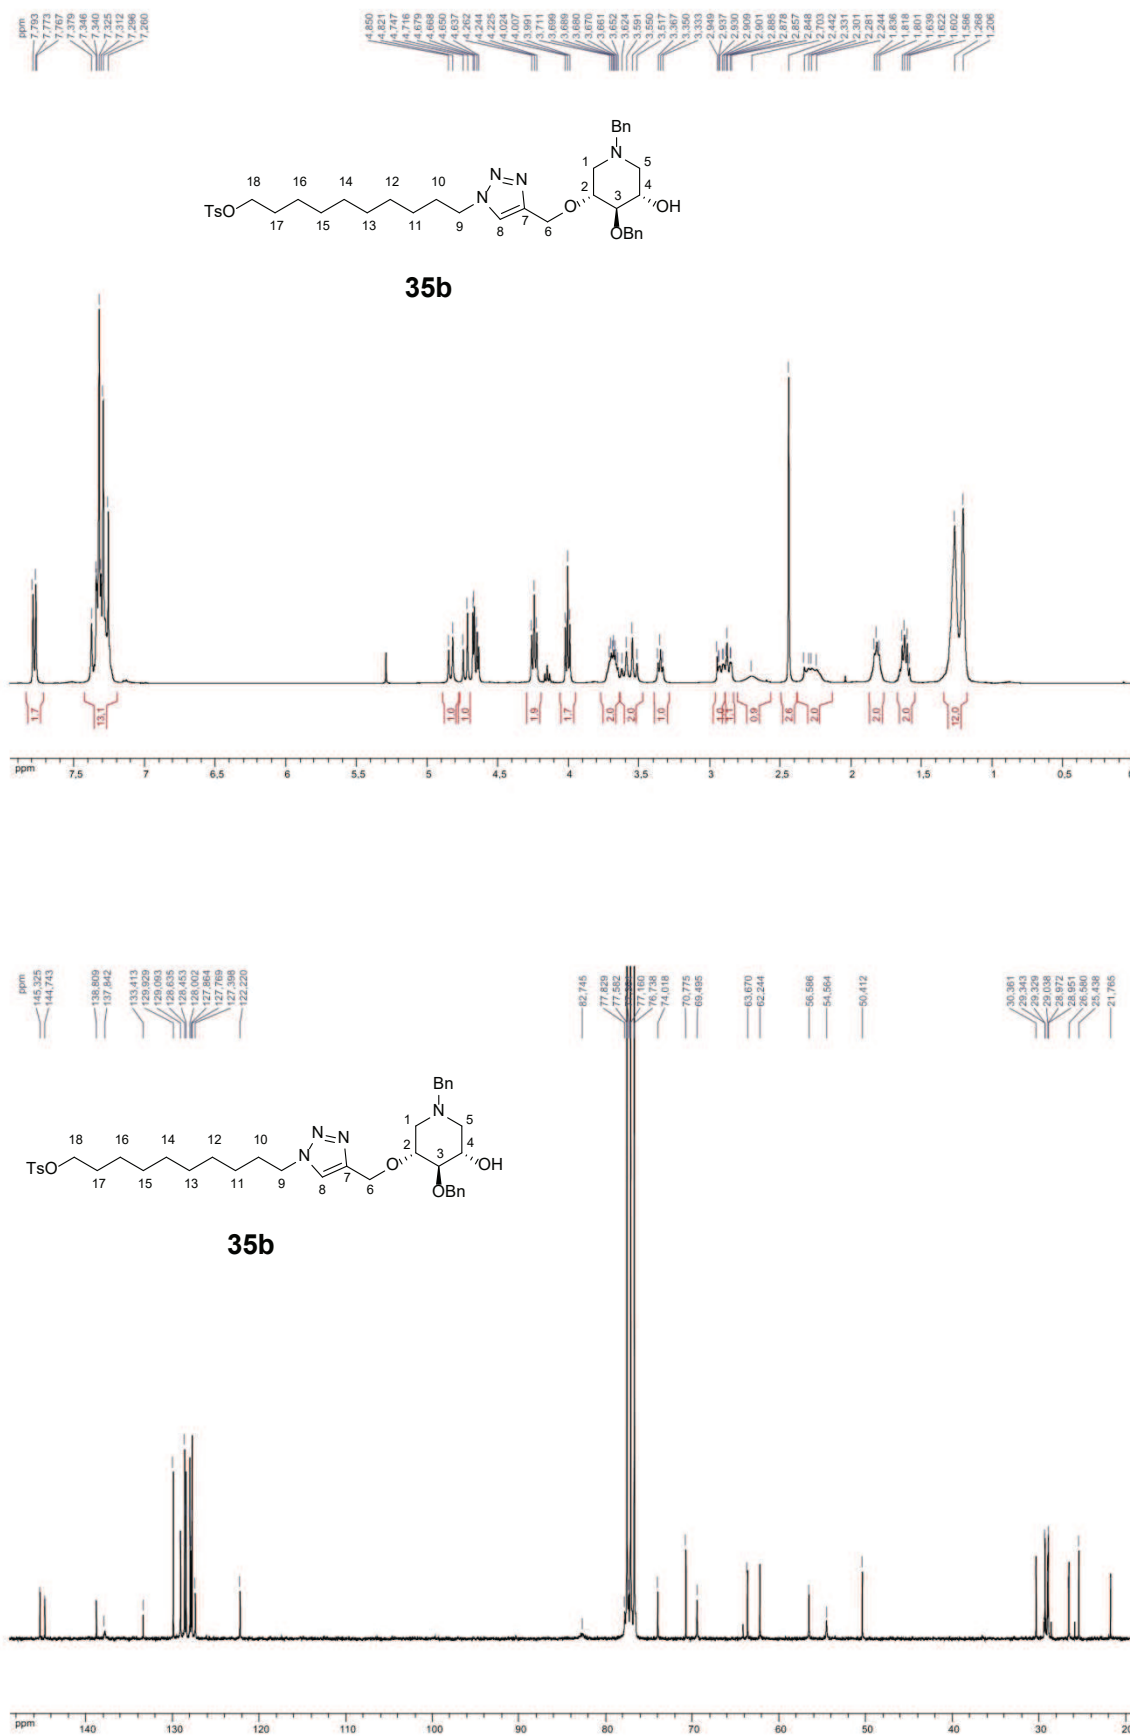

**Fig S17.** <sup>1</sup>H NMR (400 MHz, CDCl<sub>3</sub>) and <sup>13</sup>C (75.5 MHz, CDCl<sub>3</sub>) spectra of compound **35b**.

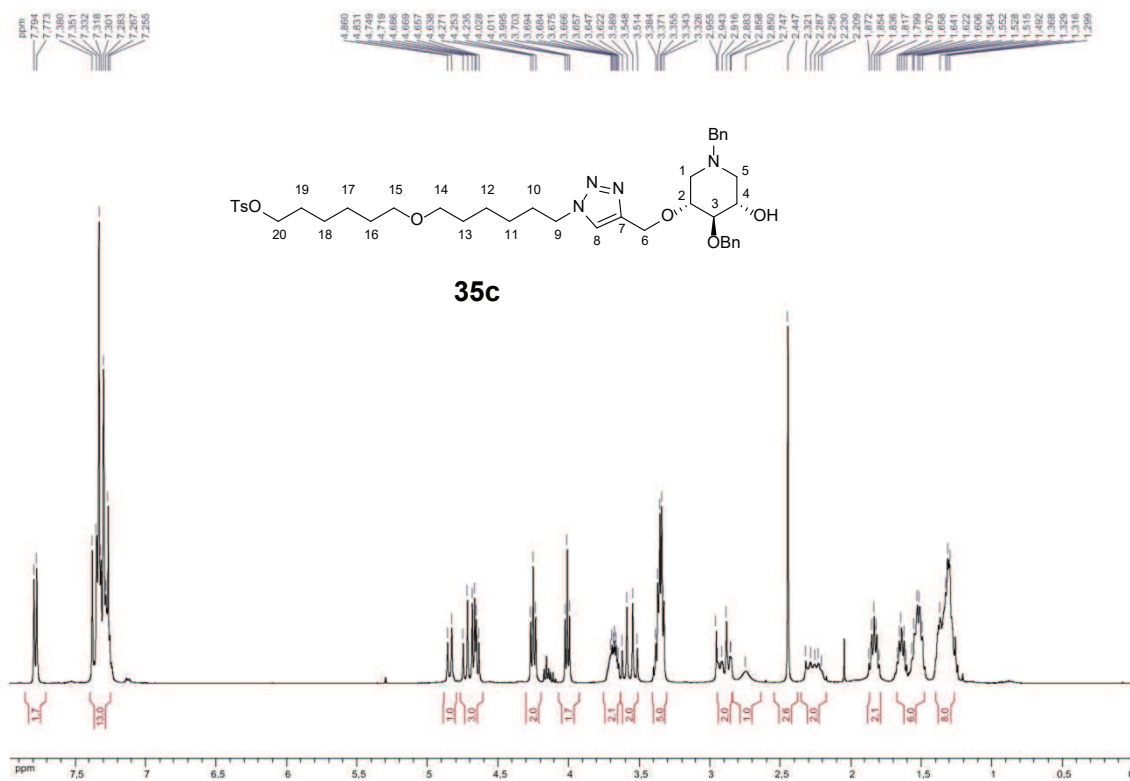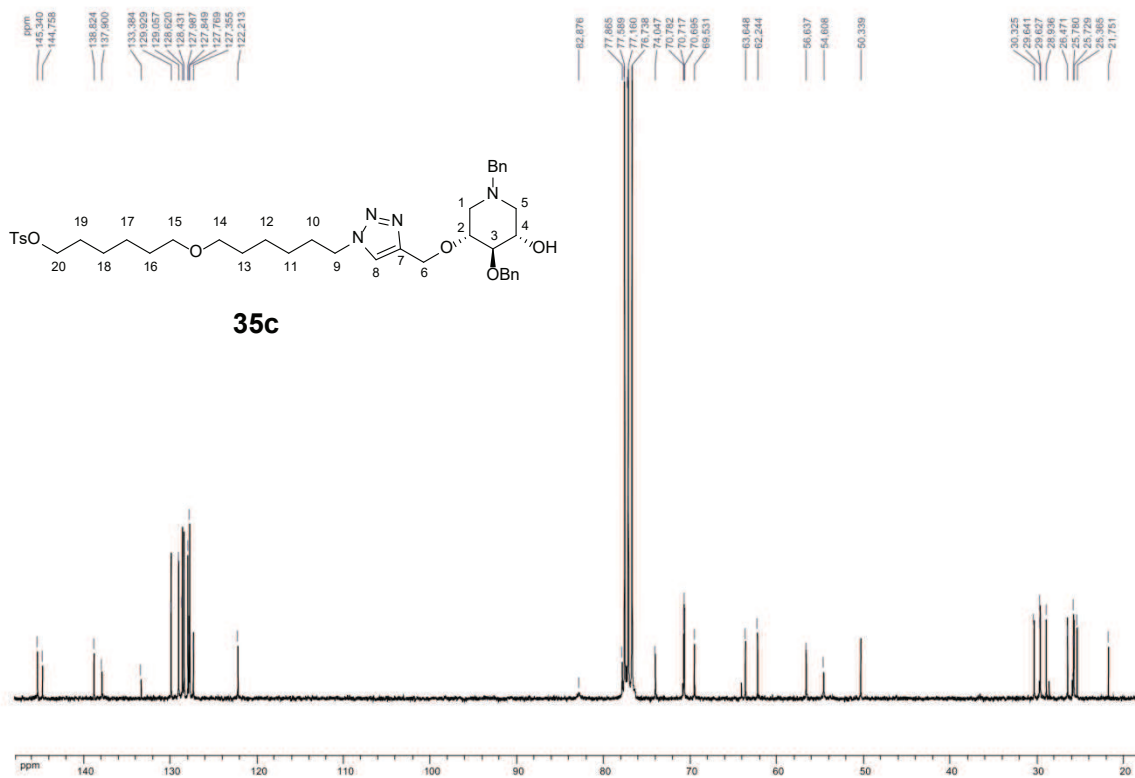

**Fig S18.**  $^1\text{H}$  NMR (400 MHz,  $\text{CDCl}_3$ ) and  $^{13}\text{C}$  (75.5 MHz,  $\text{CDCl}_3$ ) spectra of compound **35c**.

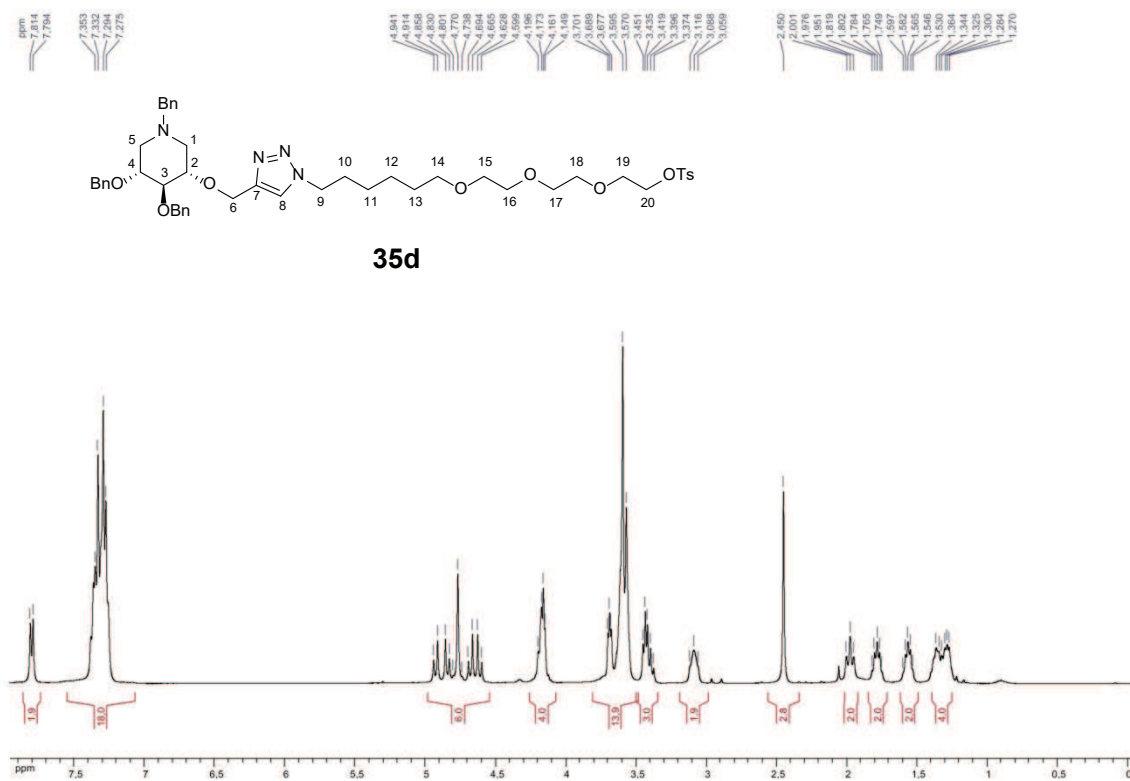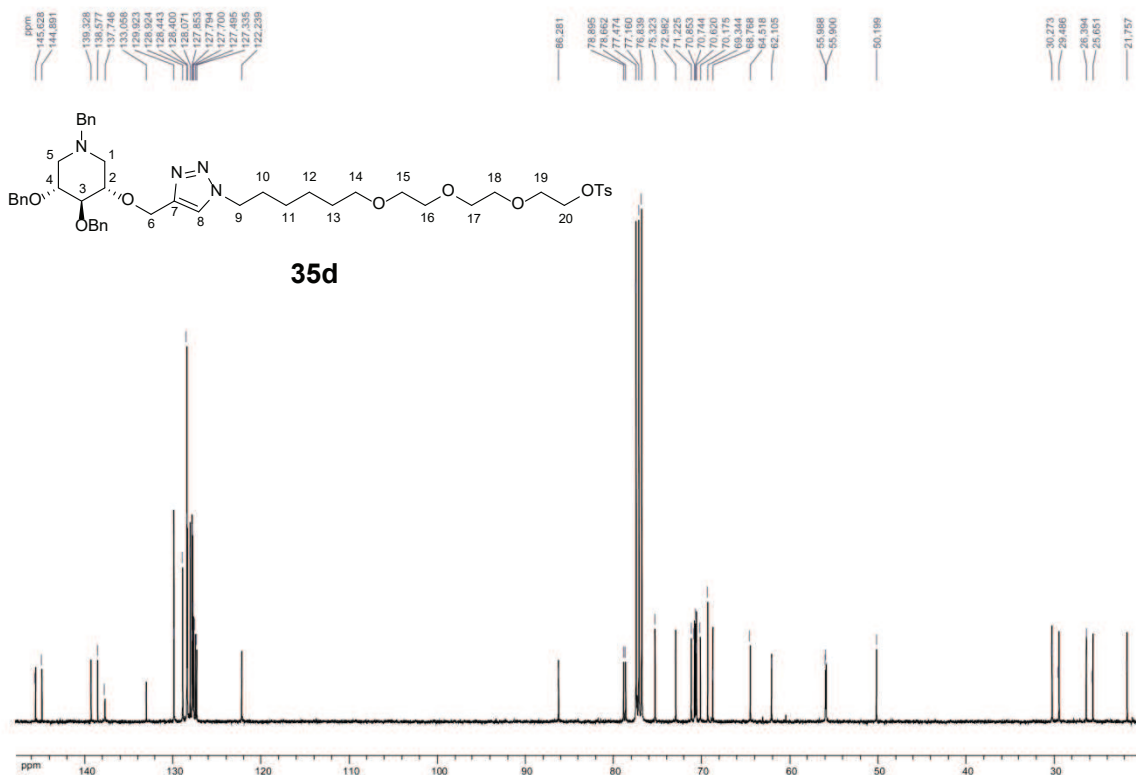

**Fig S19.** <sup>1</sup>H NMR (400 MHz, CDCl<sub>3</sub>) and <sup>13</sup>C (100 MHz, CDCl<sub>3</sub>) spectra of compound **35d**.



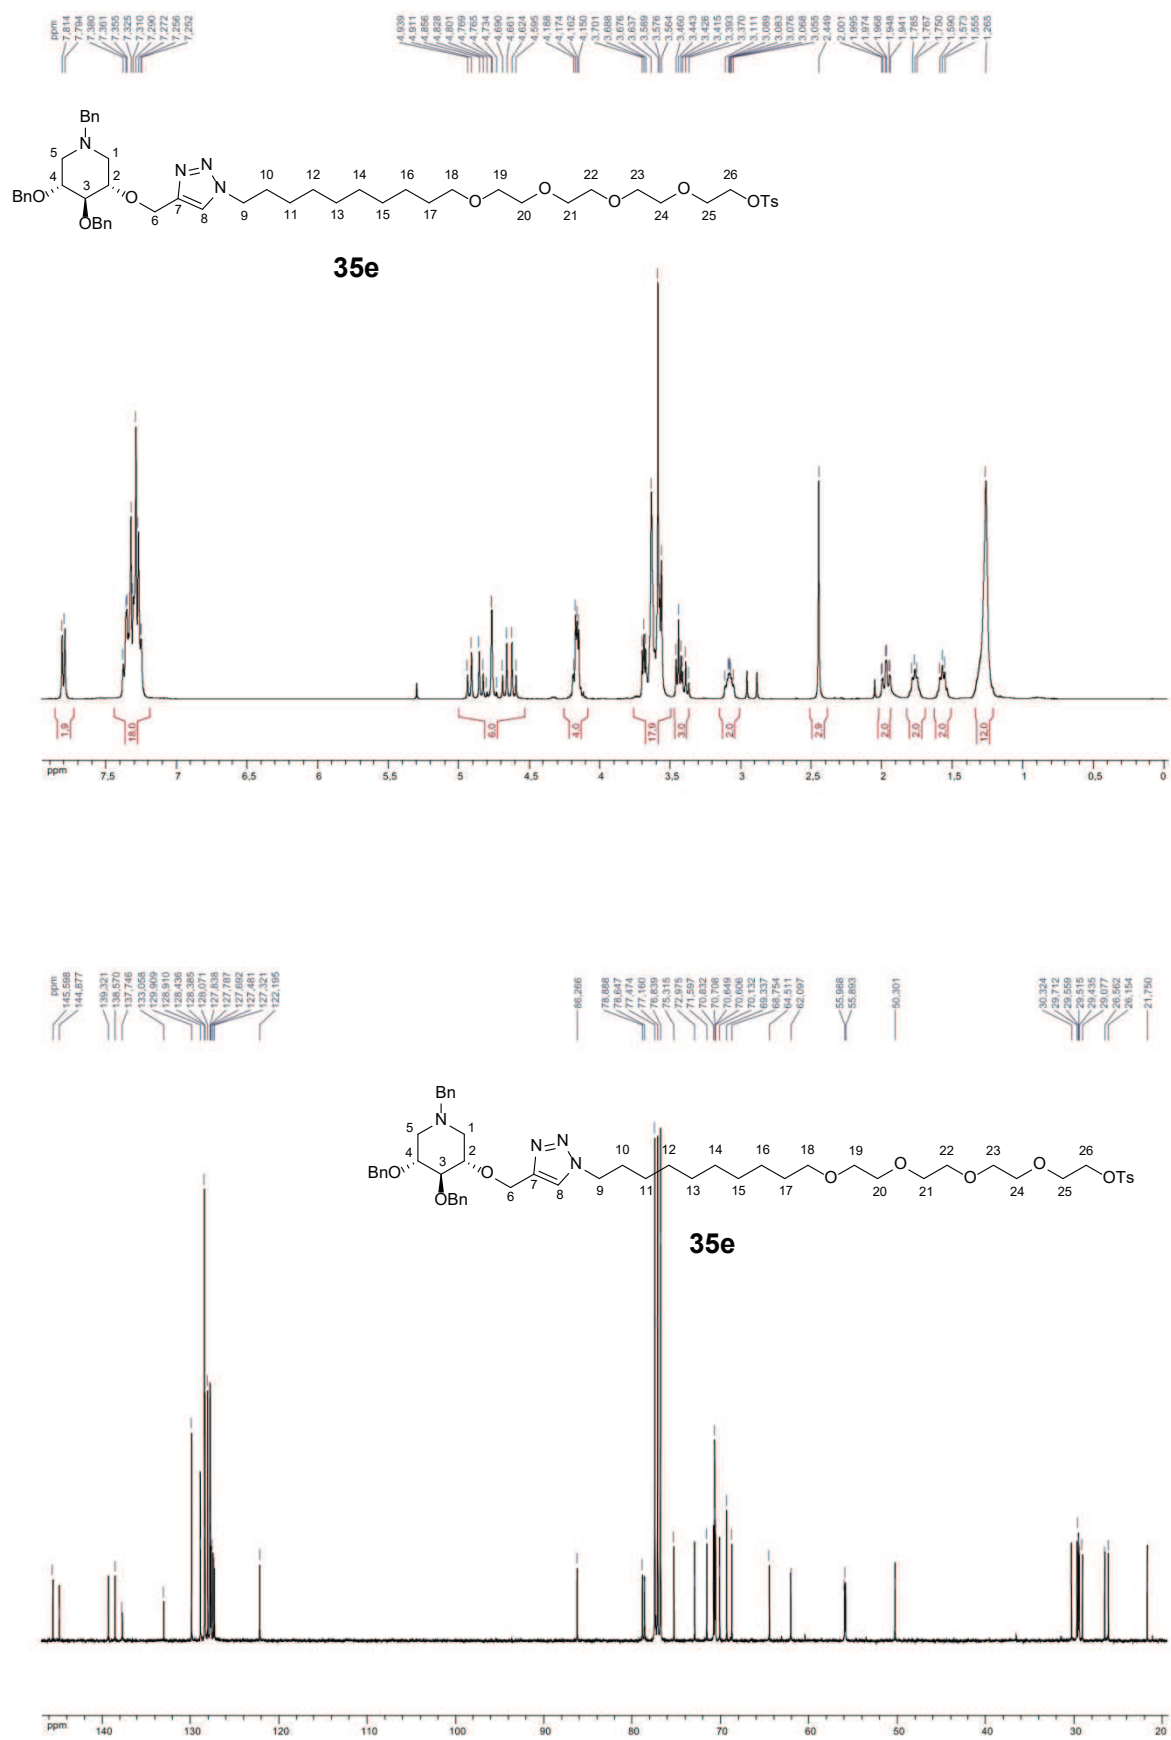

**Fig S20.** <sup>1</sup>H NMR (400 MHz, CDCl<sub>3</sub>) and <sup>13</sup>C (100 MHz, CDCl<sub>3</sub>) spectra of compound **35e**.

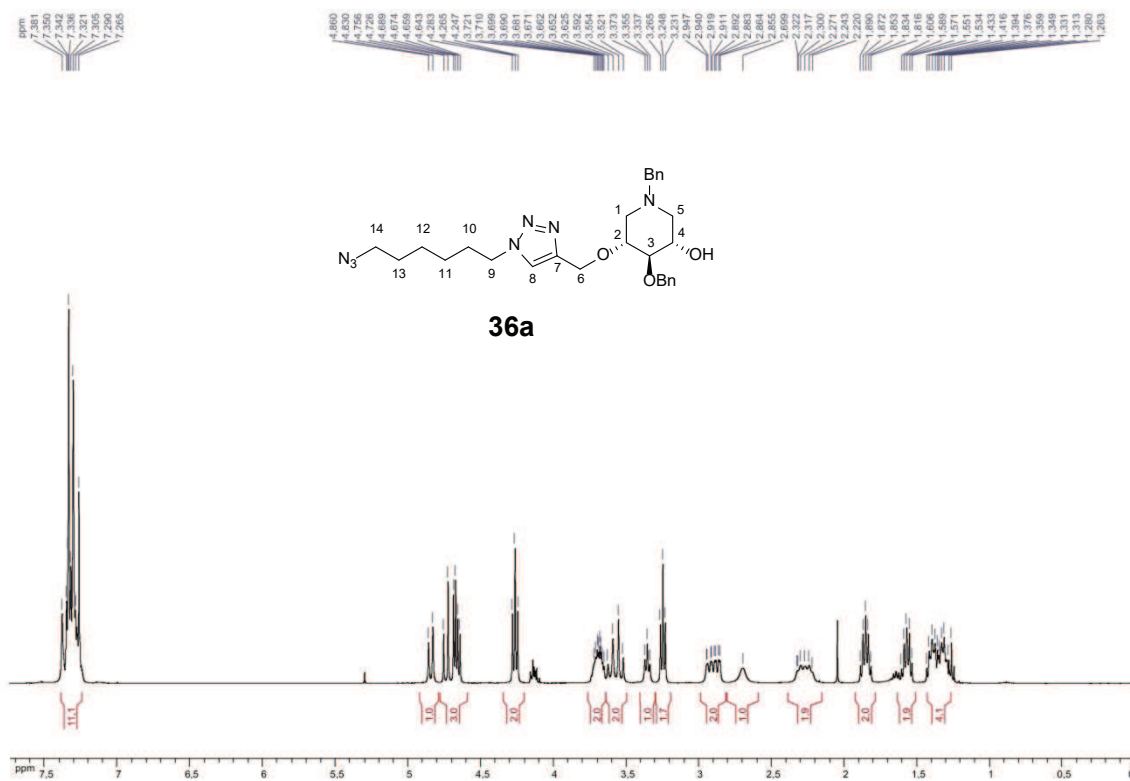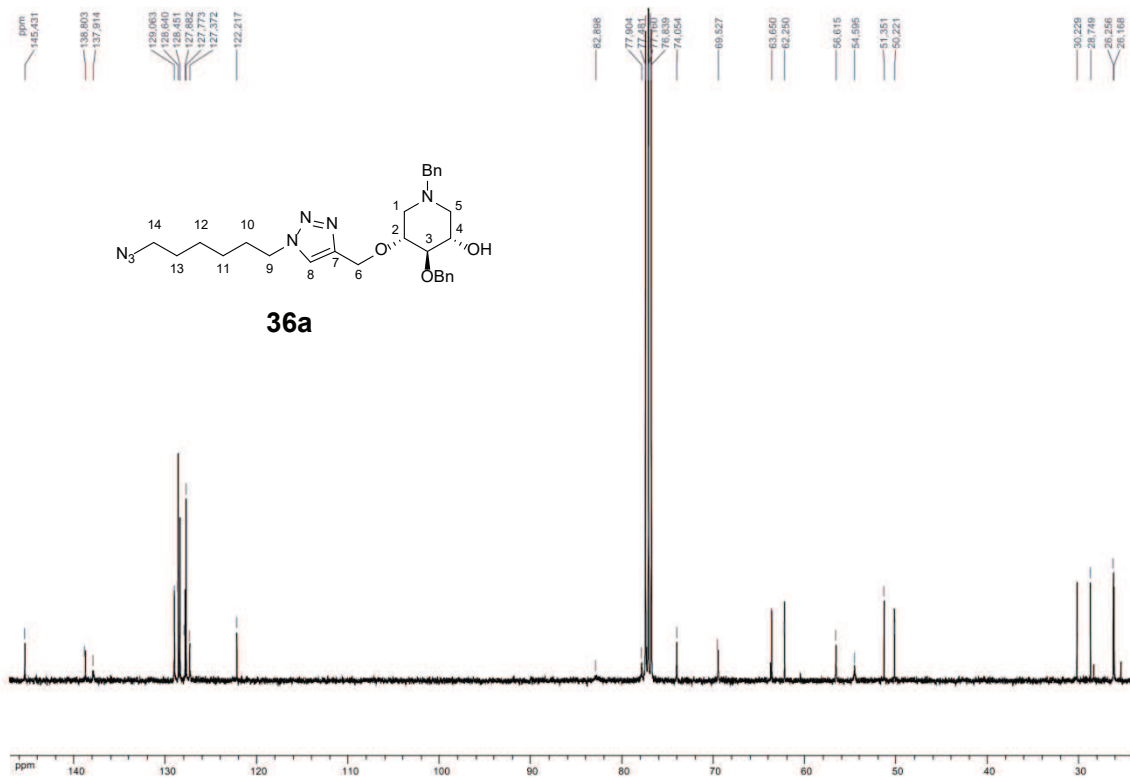

**Fig S21.**  $^1\text{H}$  NMR (400 MHz,  $\text{CDCl}_3$ ) and  $^{13}\text{C}$  (100 MHz,  $\text{CDCl}_3$ ) spectra of compound **36a**.

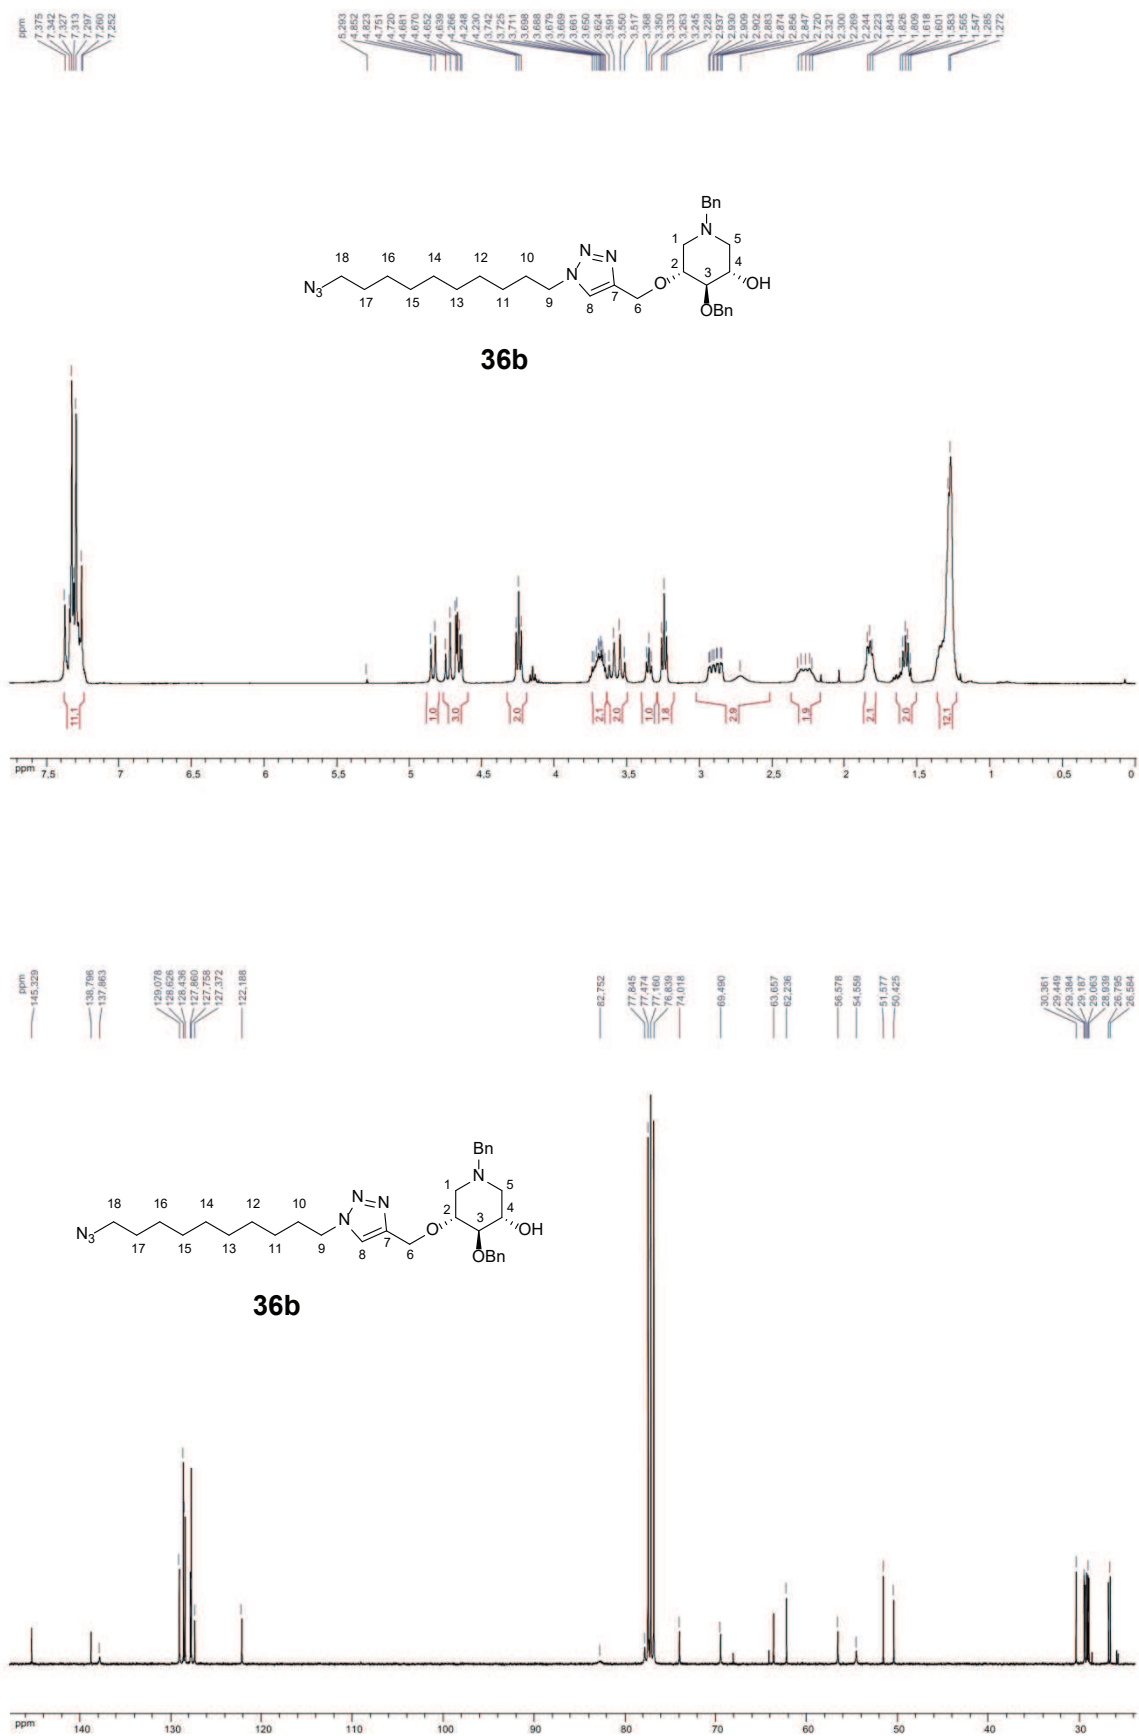

**Fig S22.** <sup>1</sup>H NMR (400 MHz, CDCl<sub>3</sub>) and <sup>13</sup>C (100 MHz, CDCl<sub>3</sub>) spectra of compound **36b**.

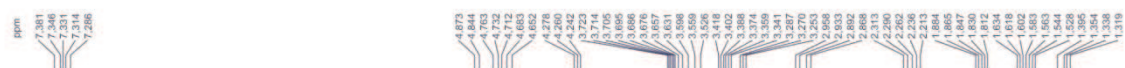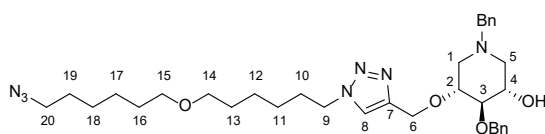

**36c**

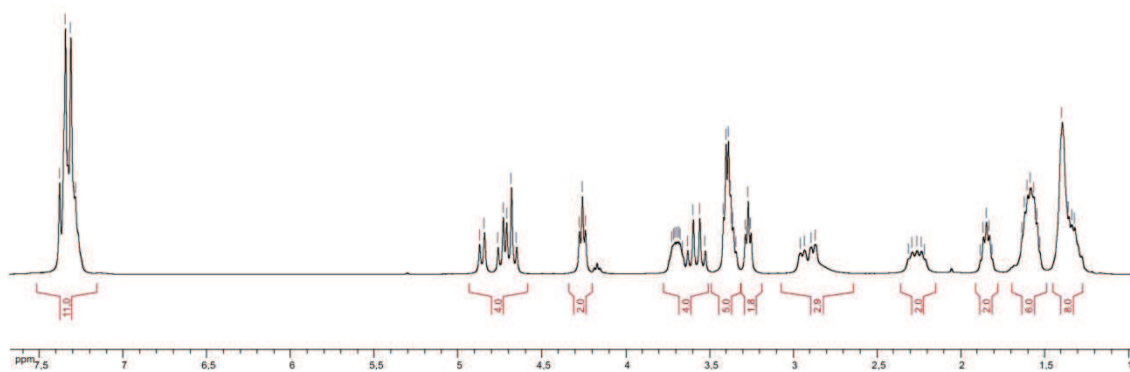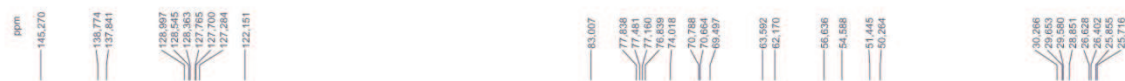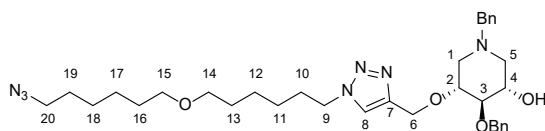

**36c**

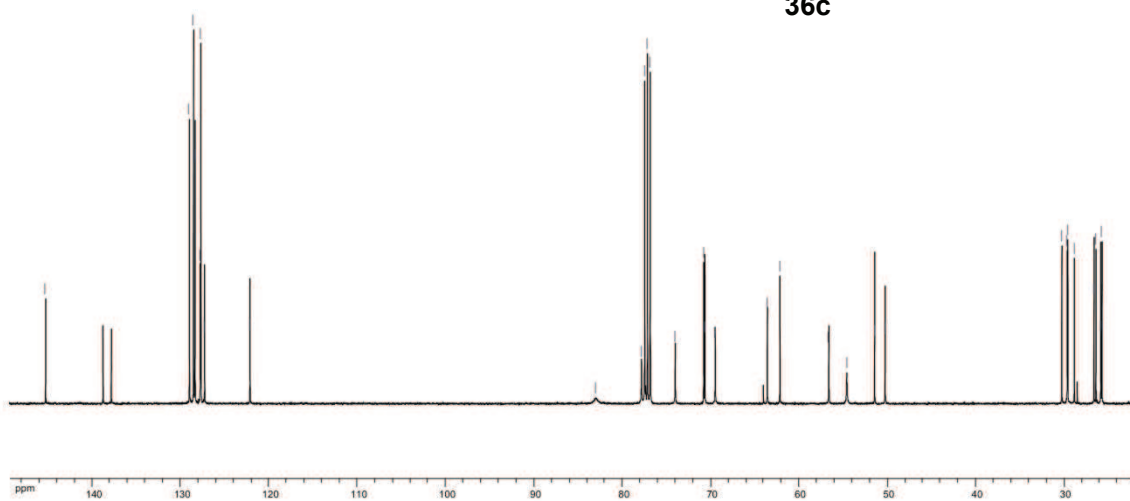

**Fig S23.**  $^1\text{H}$  NMR (400 MHz,  $\text{CDCl}_3$ ) and  $^{13}\text{C}$  (100 MHz,  $\text{CDCl}_3$ ) spectra of compound **36c**.

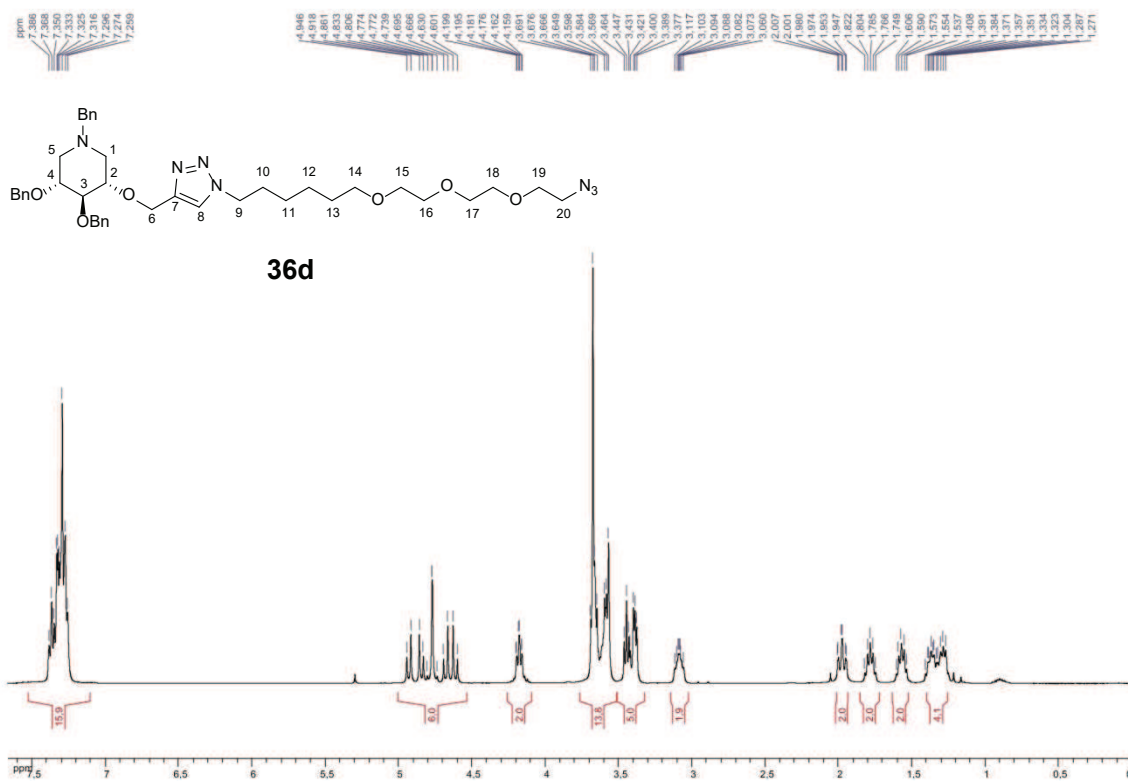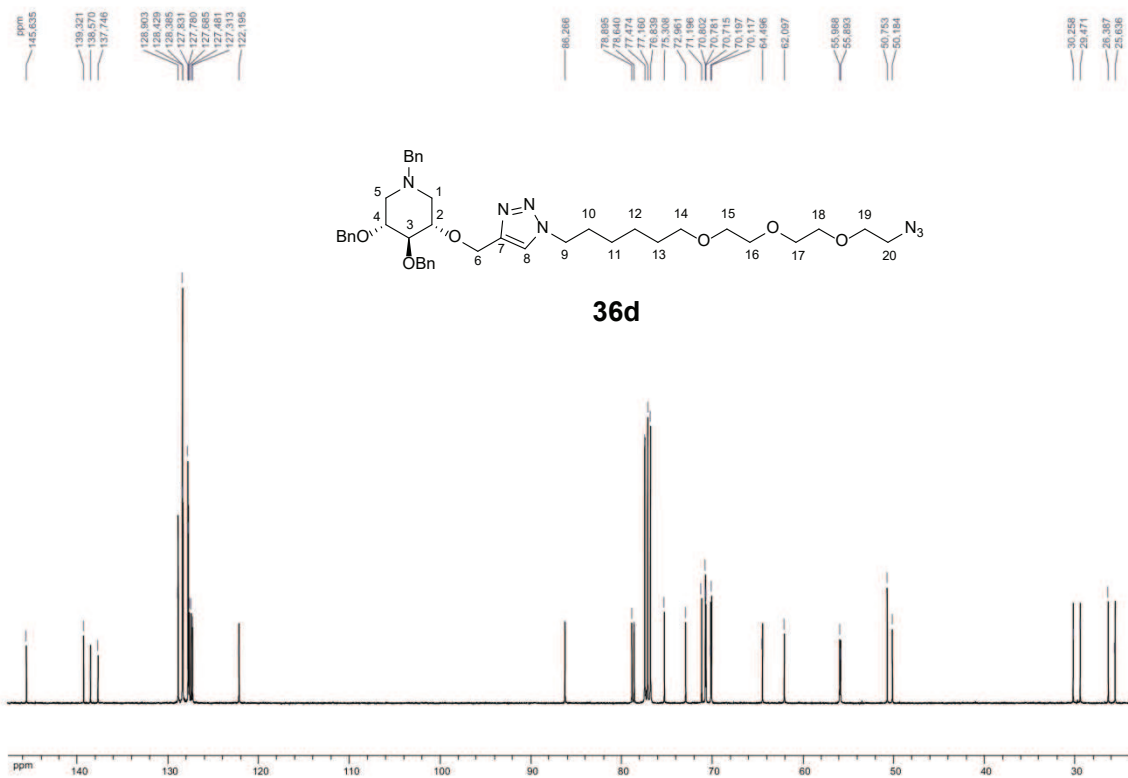

**Fig S24.** <sup>1</sup>H NMR (400 MHz, CDCl<sub>3</sub>) and <sup>13</sup>C (100 MHz, CDCl<sub>3</sub>) spectra of compound **36d**.

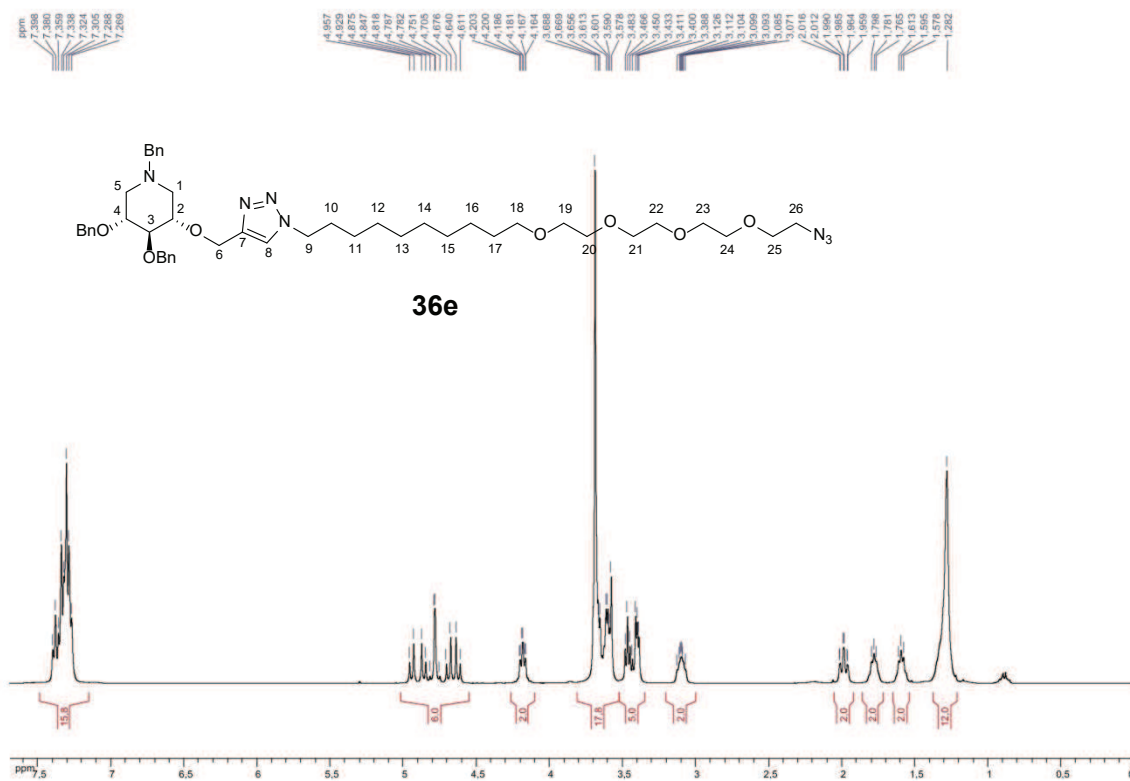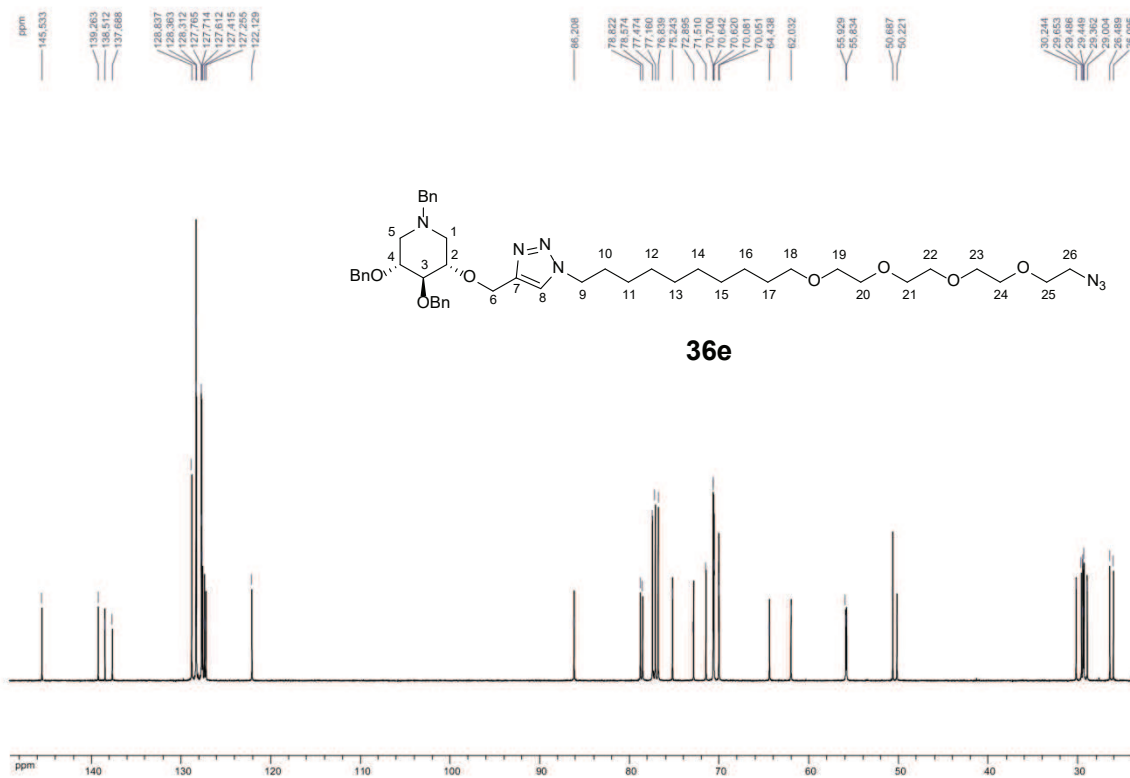

**Fig S25.** <sup>1</sup>H NMR (400 MHz, CDCl<sub>3</sub>) and <sup>13</sup>C (100 MHz, CDCl<sub>3</sub>) spectra of compound **36e**.

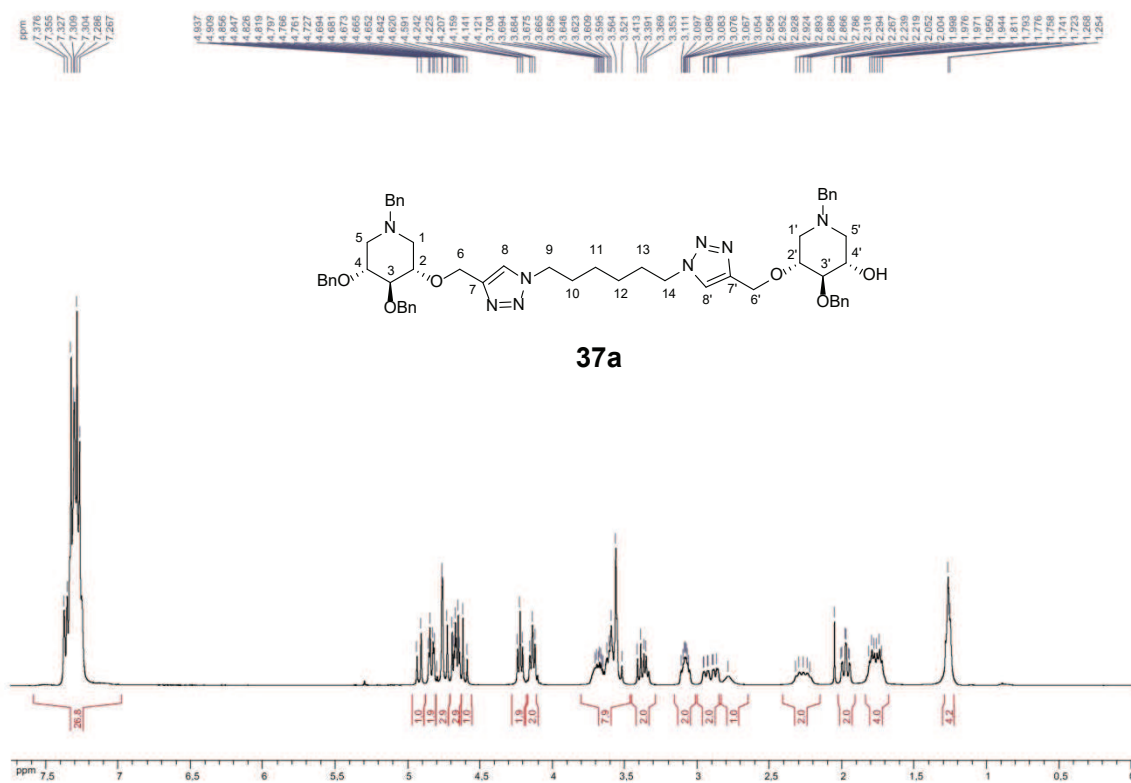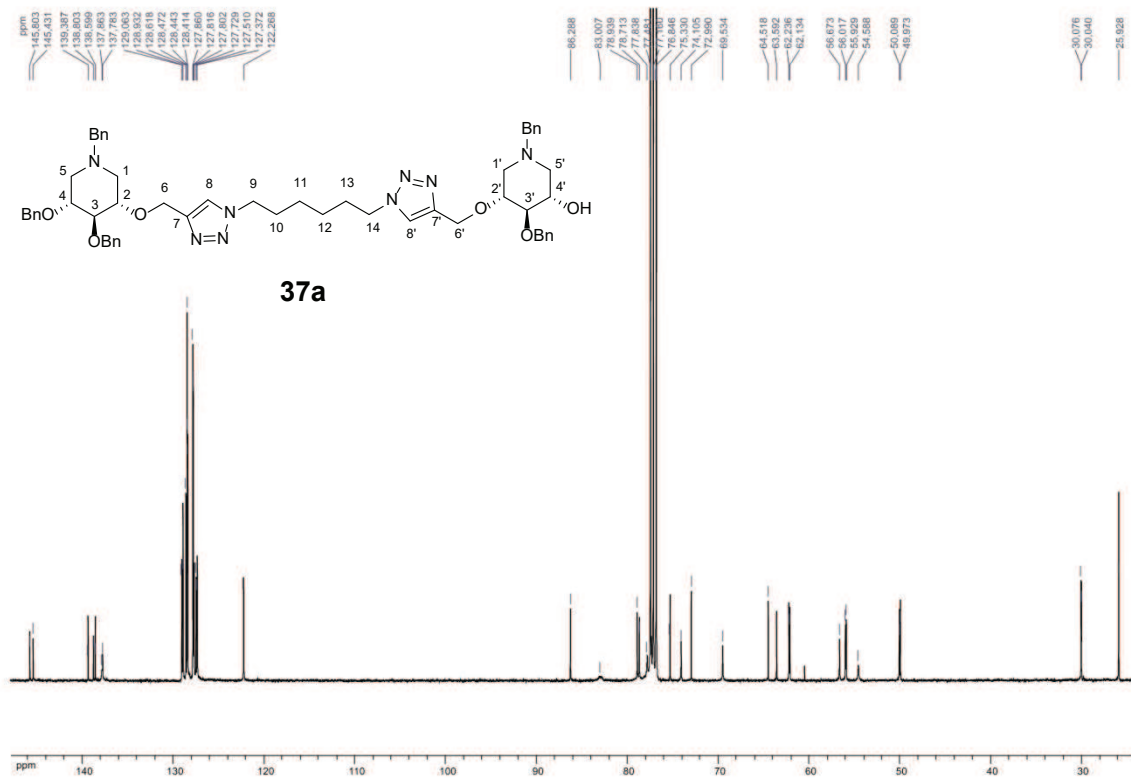

**Fig S26.** <sup>1</sup>H NMR (400 MHz, CDCl<sub>3</sub>) and <sup>13</sup>C (100 MHz, CDCl<sub>3</sub>) spectra of compound **37a**.

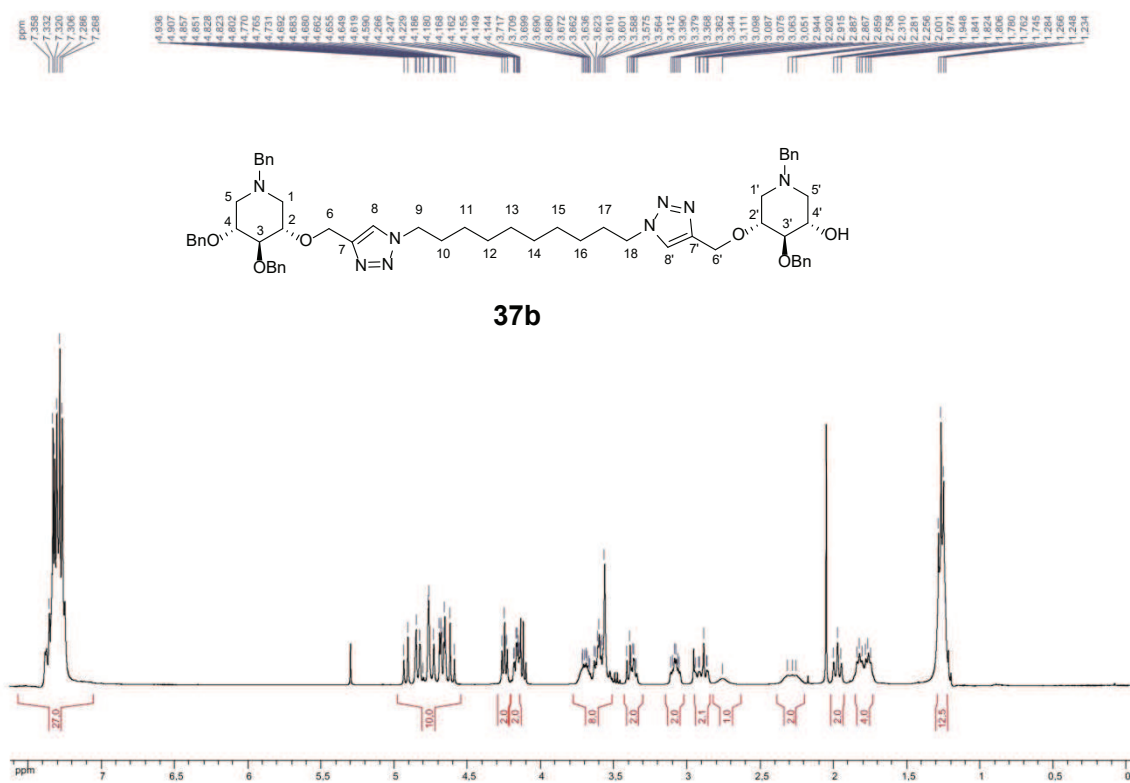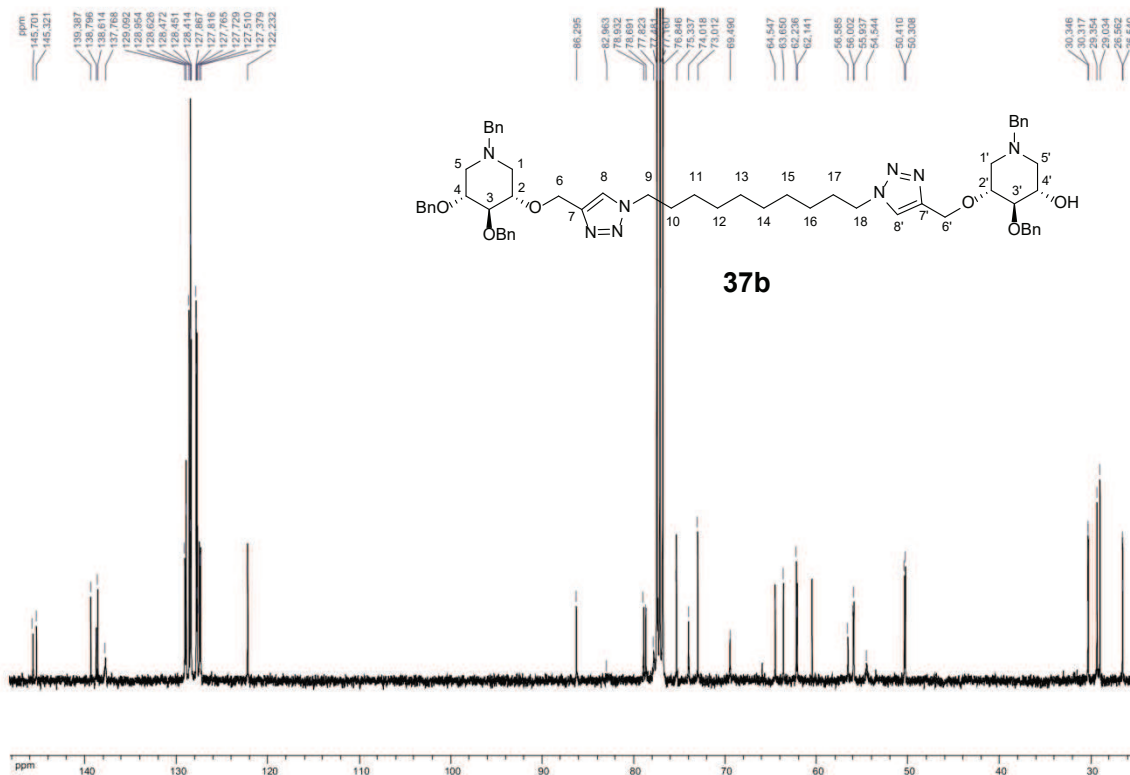

**Fig S27.** <sup>1</sup>H NMR (400 MHz, CDCl<sub>3</sub>) and <sup>13</sup>C (100 MHz, CDCl<sub>3</sub>) spectra of compound 37b.



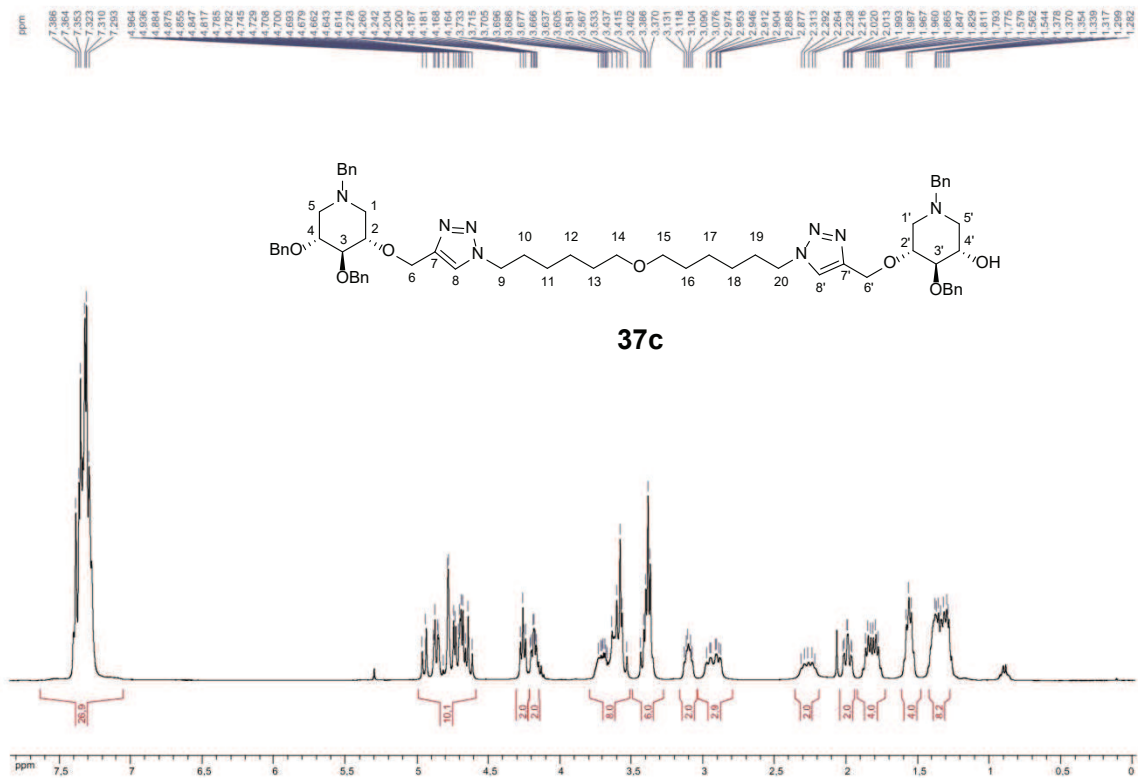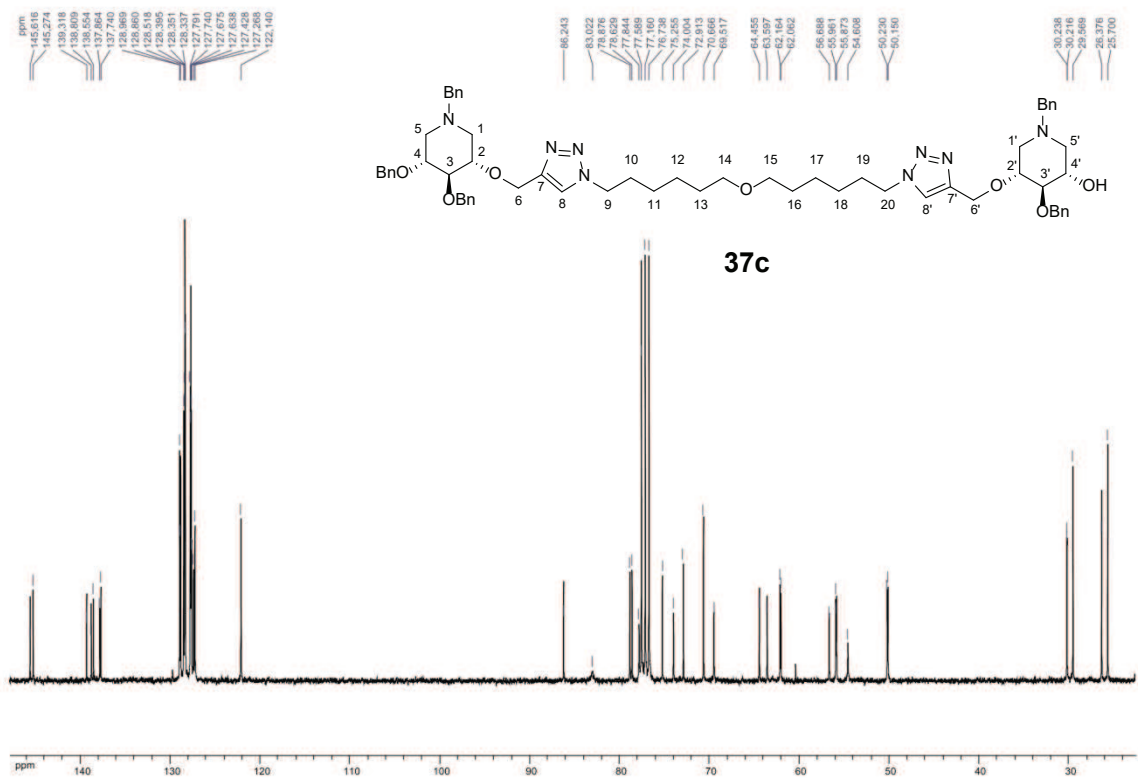

**Fig S28.**  $^1\text{H}$  NMR (400 MHz,  $\text{CDCl}_3$ ) and  $^{13}\text{C}$  (75.5 MHz,  $\text{CDCl}_3$ ) spectra of compound **37c**.

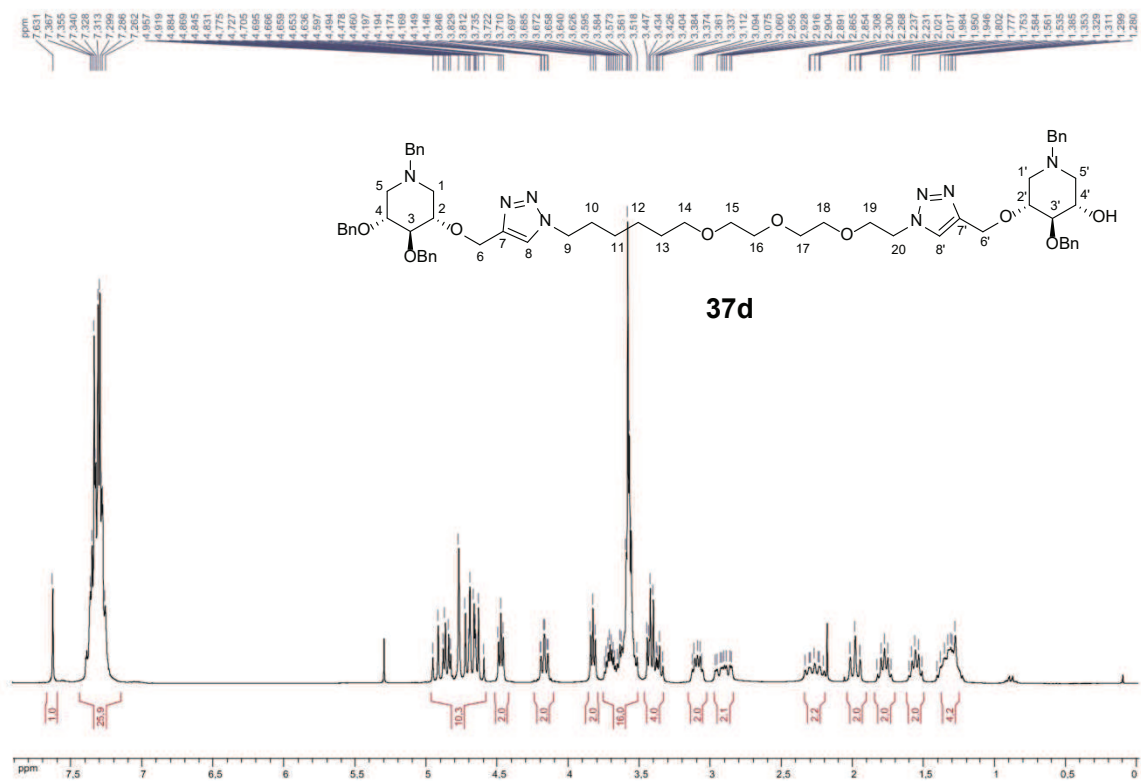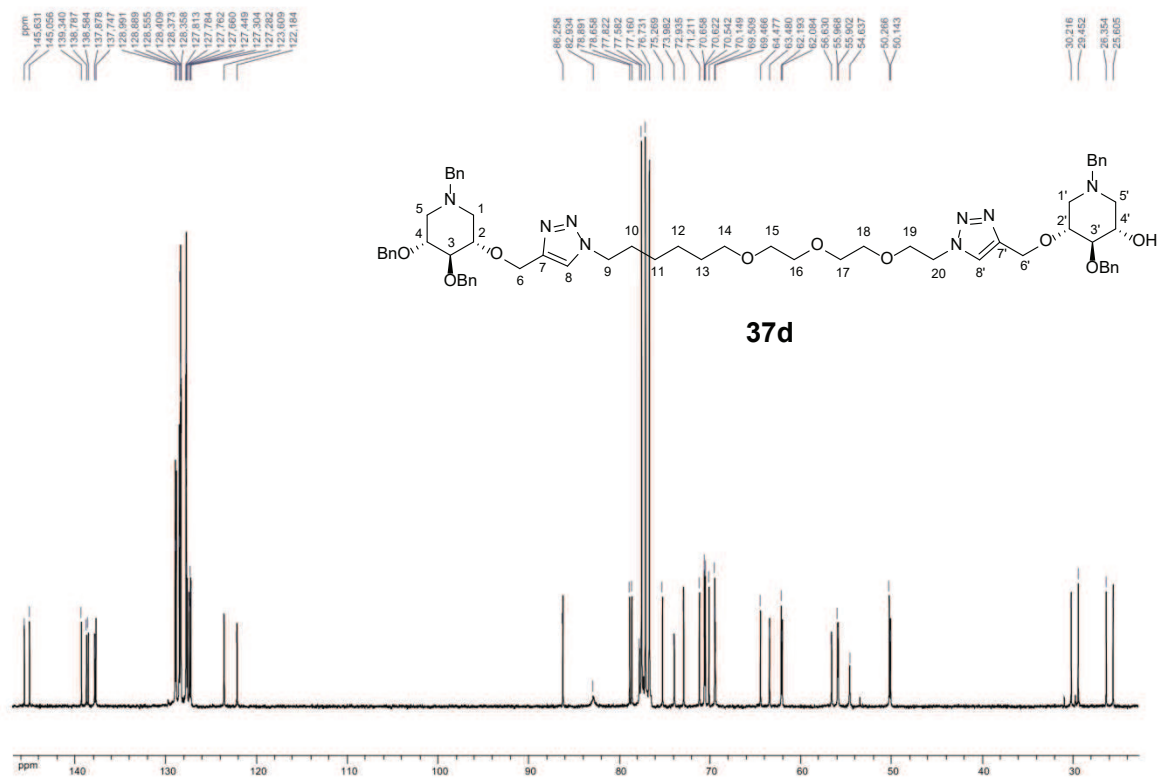

**Fig S29.**  $^1\text{H}$  NMR (300 MHz,  $\text{CDCl}_3$ ) and  $^{13}\text{C}$  (75.5 MHz,  $\text{CDCl}_3$ ) spectra of compound **37d**.

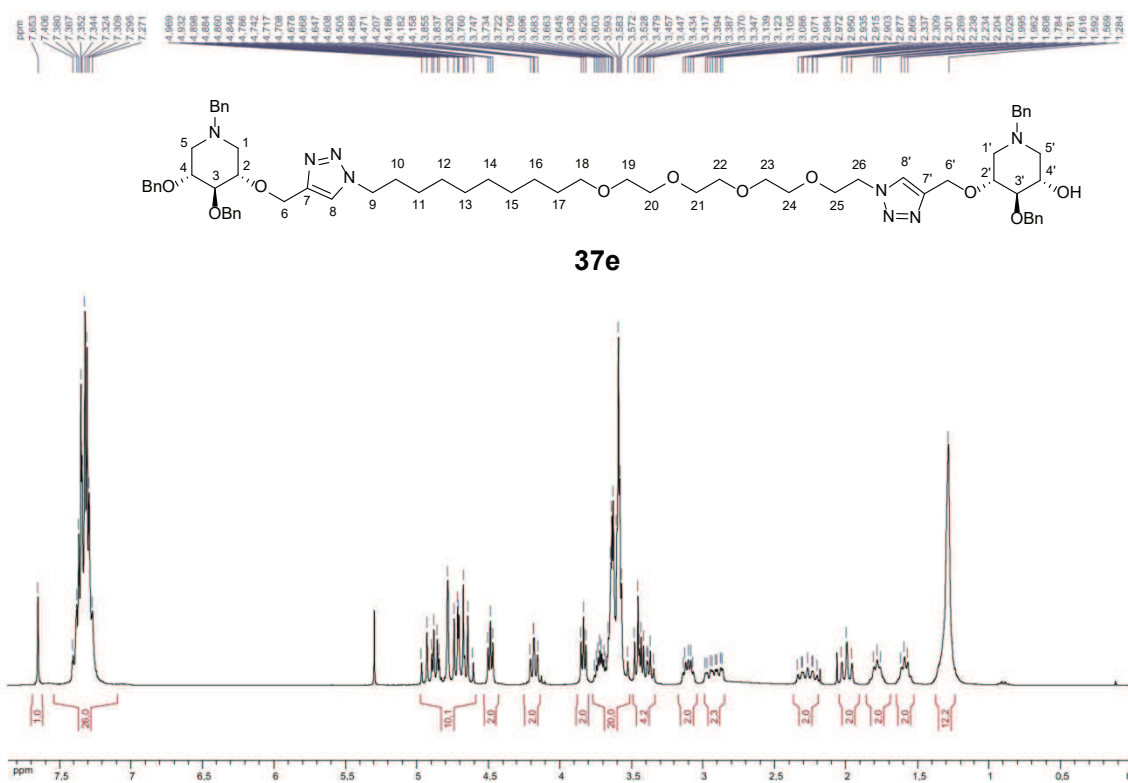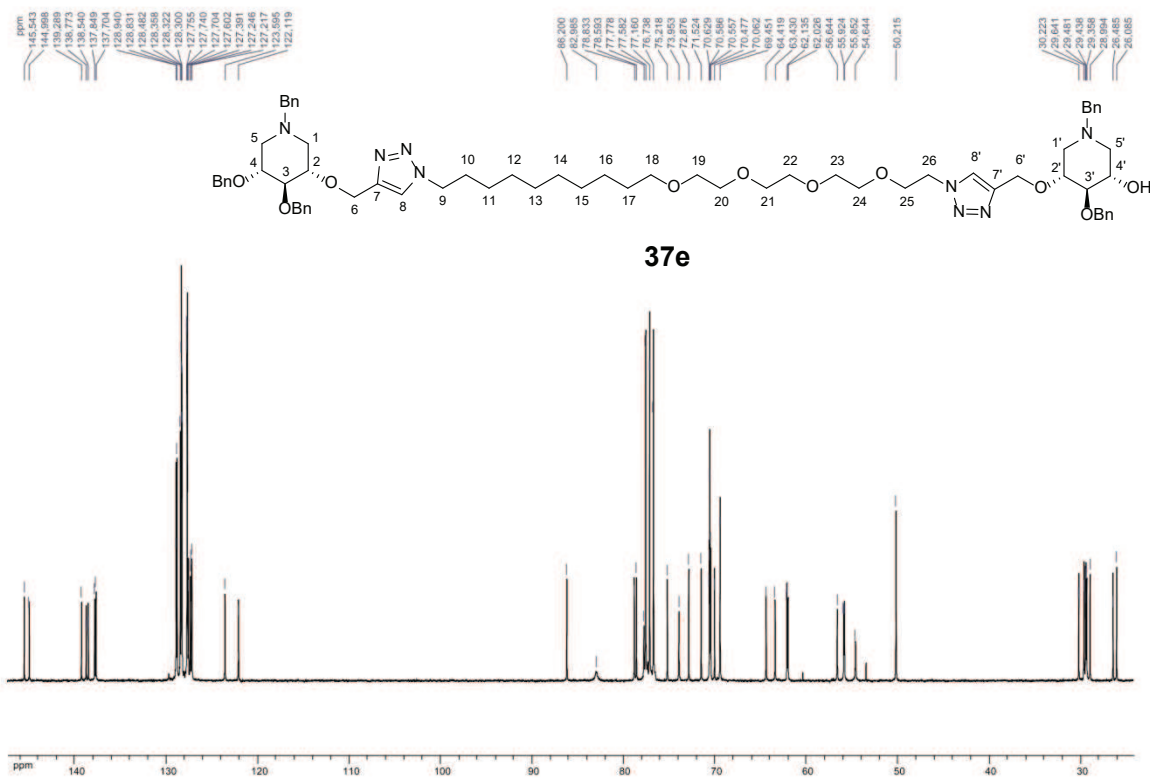

**Fig S30.** <sup>1</sup>H NMR (300 MHz, CDCl<sub>3</sub>) and <sup>13</sup>C (75.5 MHz, CDCl<sub>3</sub>) spectra of compound **37e**.

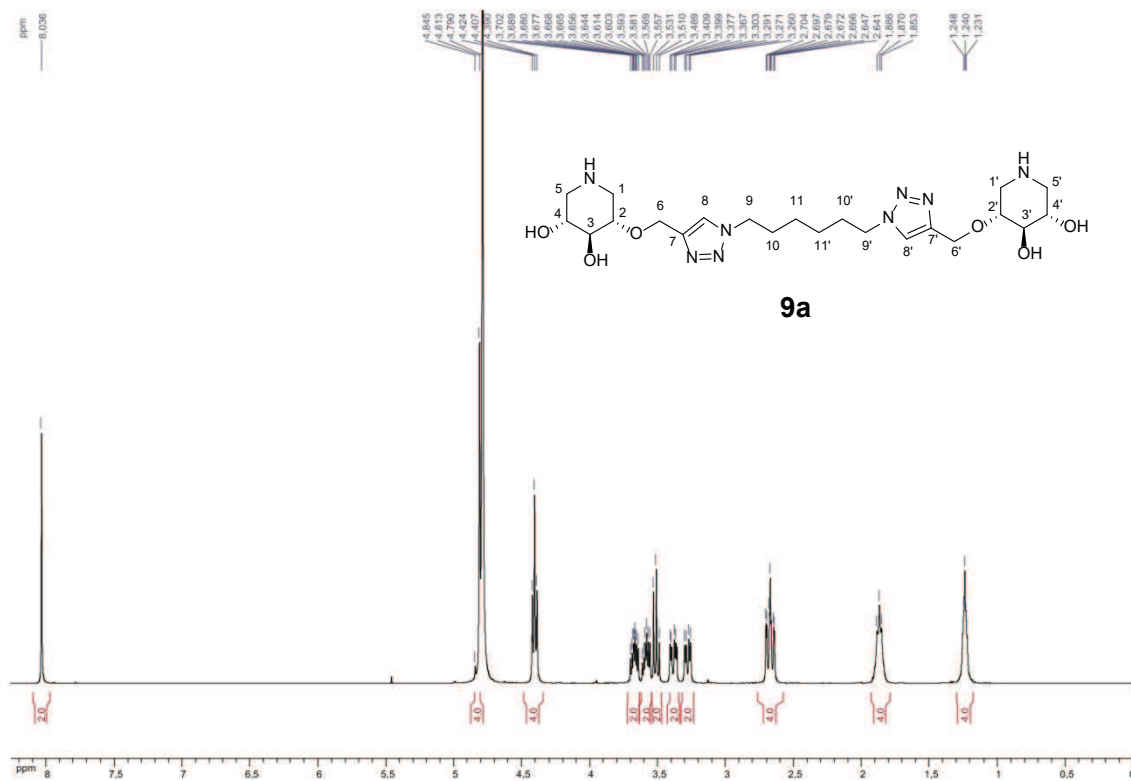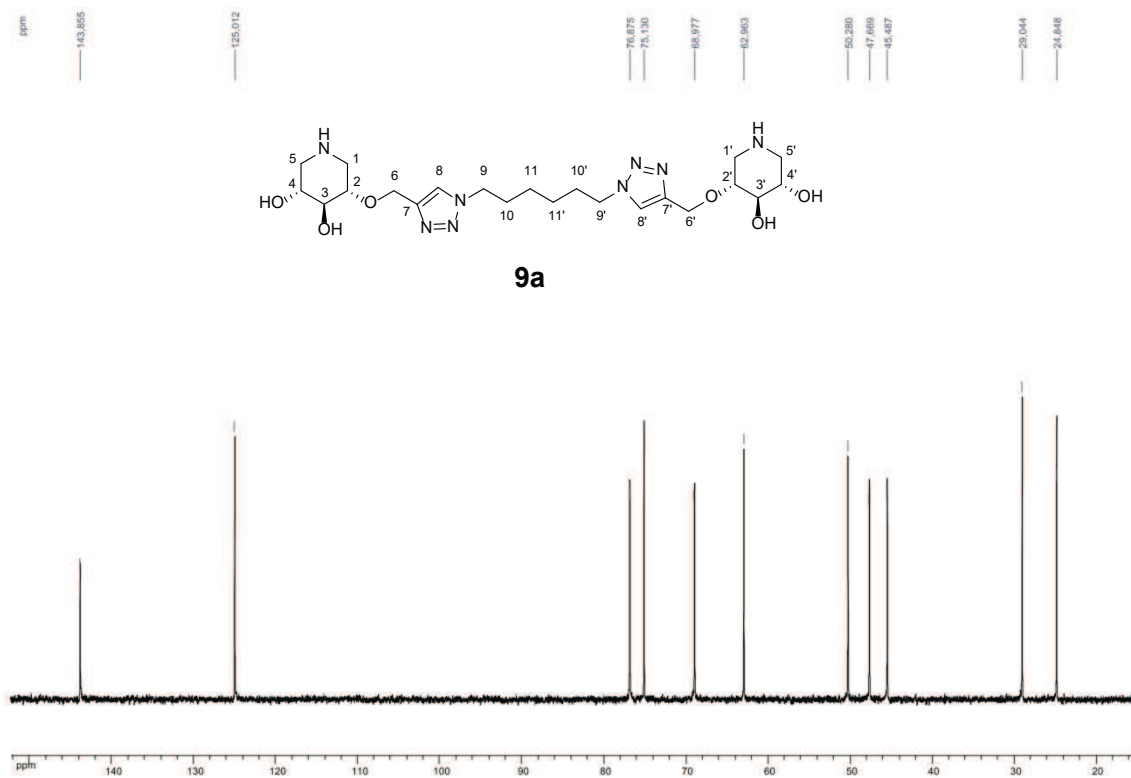

**Fig S31.** <sup>1</sup>H NMR (400 MHz, D<sub>2</sub>O) and <sup>13</sup>C (75.5 MHz, D<sub>2</sub>O) spectra of compound 9a.

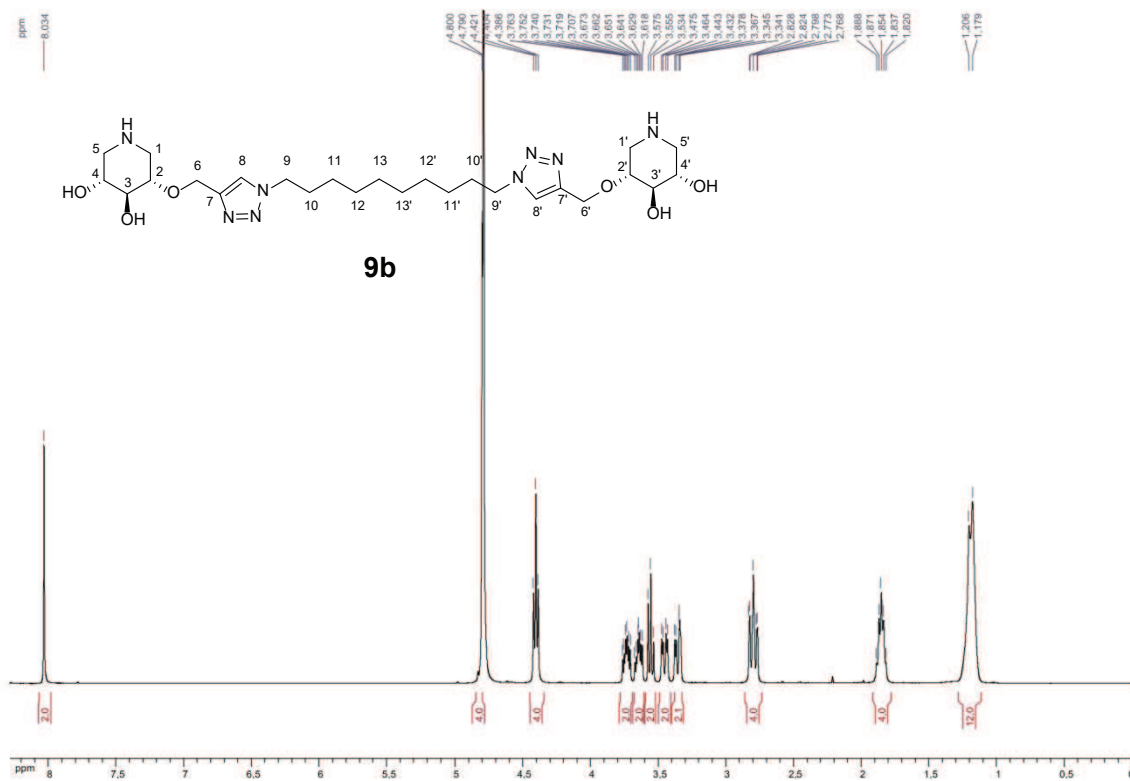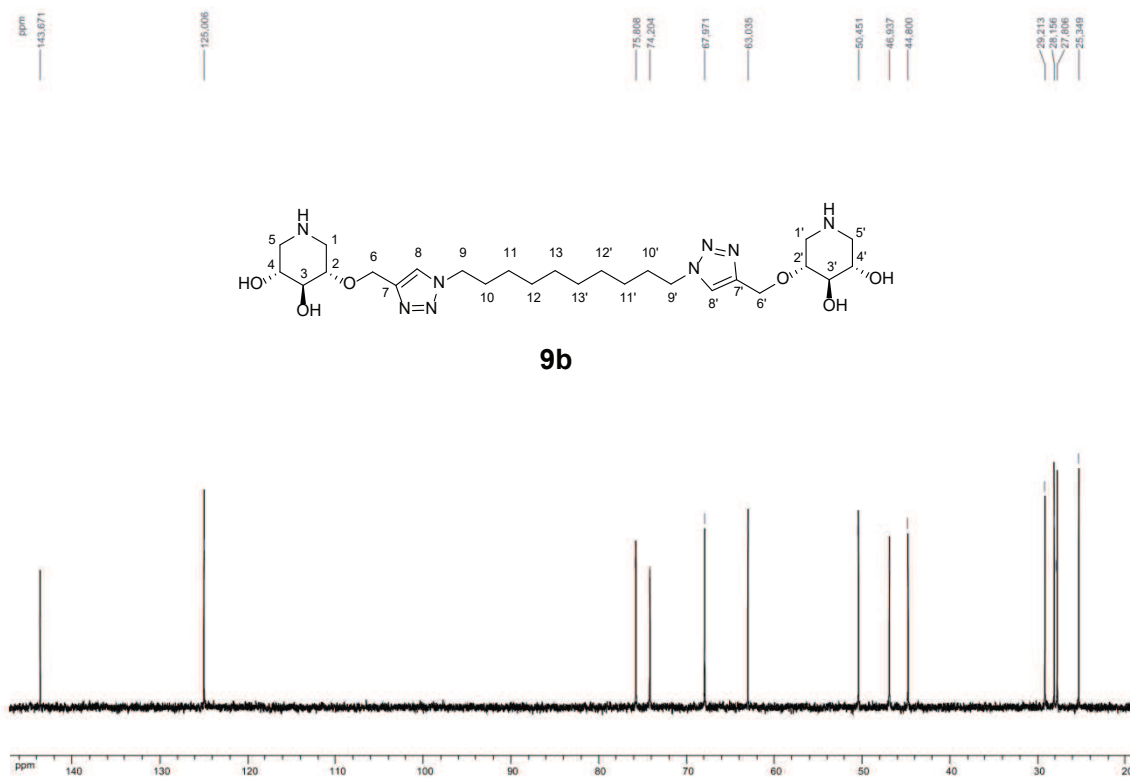

**Fig S32.** <sup>1</sup>H NMR (400 MHz, D<sub>2</sub>O) and <sup>13</sup>C (100 MHz, D<sub>2</sub>O) spectra of compound **9b**.

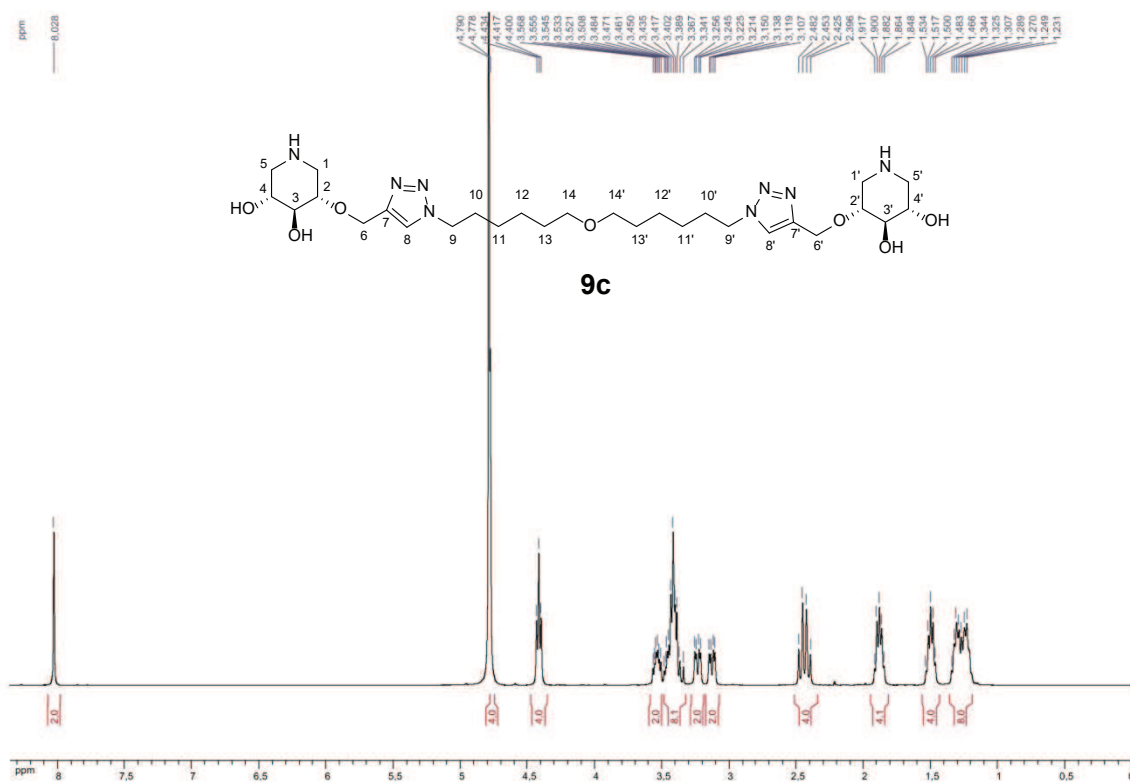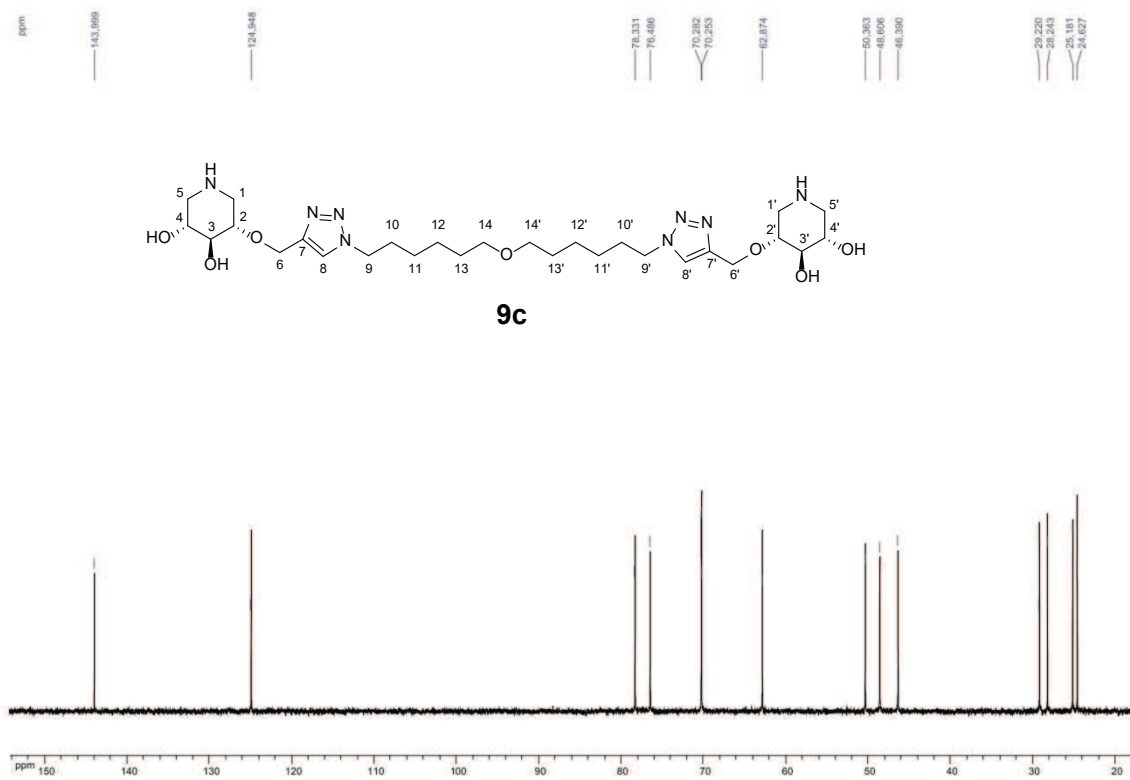

**Fig S33.** <sup>1</sup>H NMR (400 MHz, D<sub>2</sub>O) and <sup>13</sup>C (100 MHz, D<sub>2</sub>O) spectra of compound **9c**.

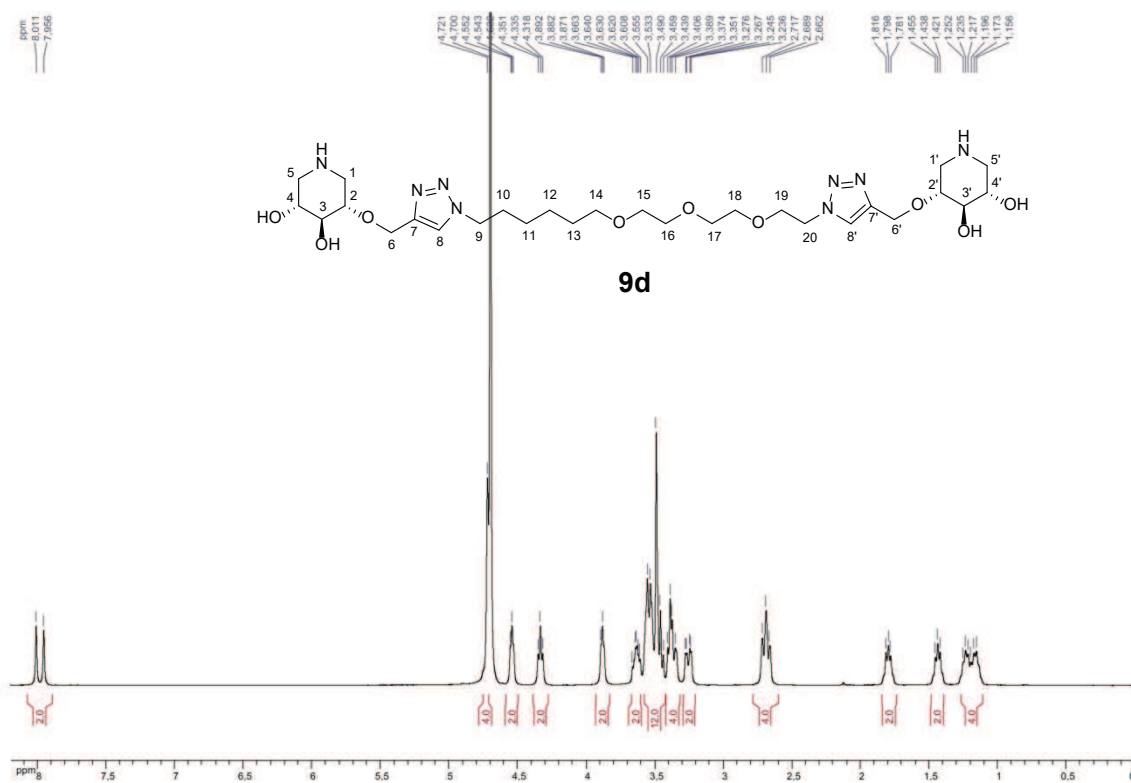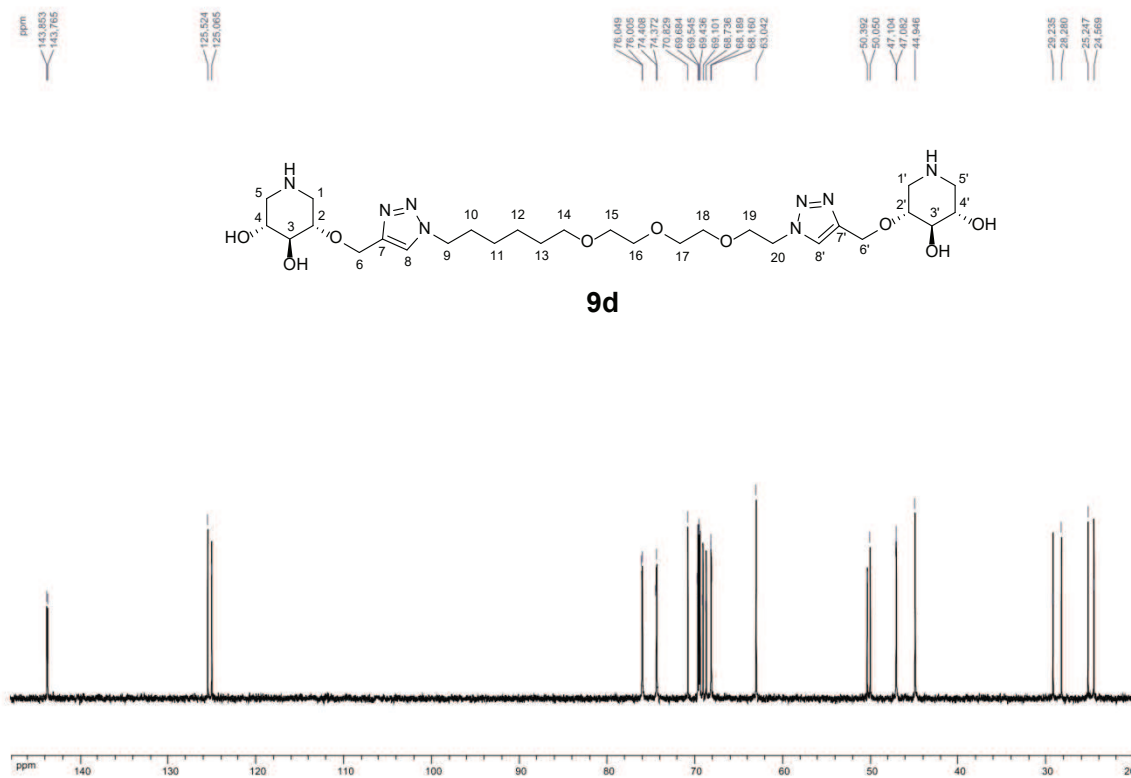

**Fig S34.** <sup>1</sup>H NMR (400 MHz, D<sub>2</sub>O) and <sup>13</sup>C (100 MHz, D<sub>2</sub>O) spectra of compound 9d.

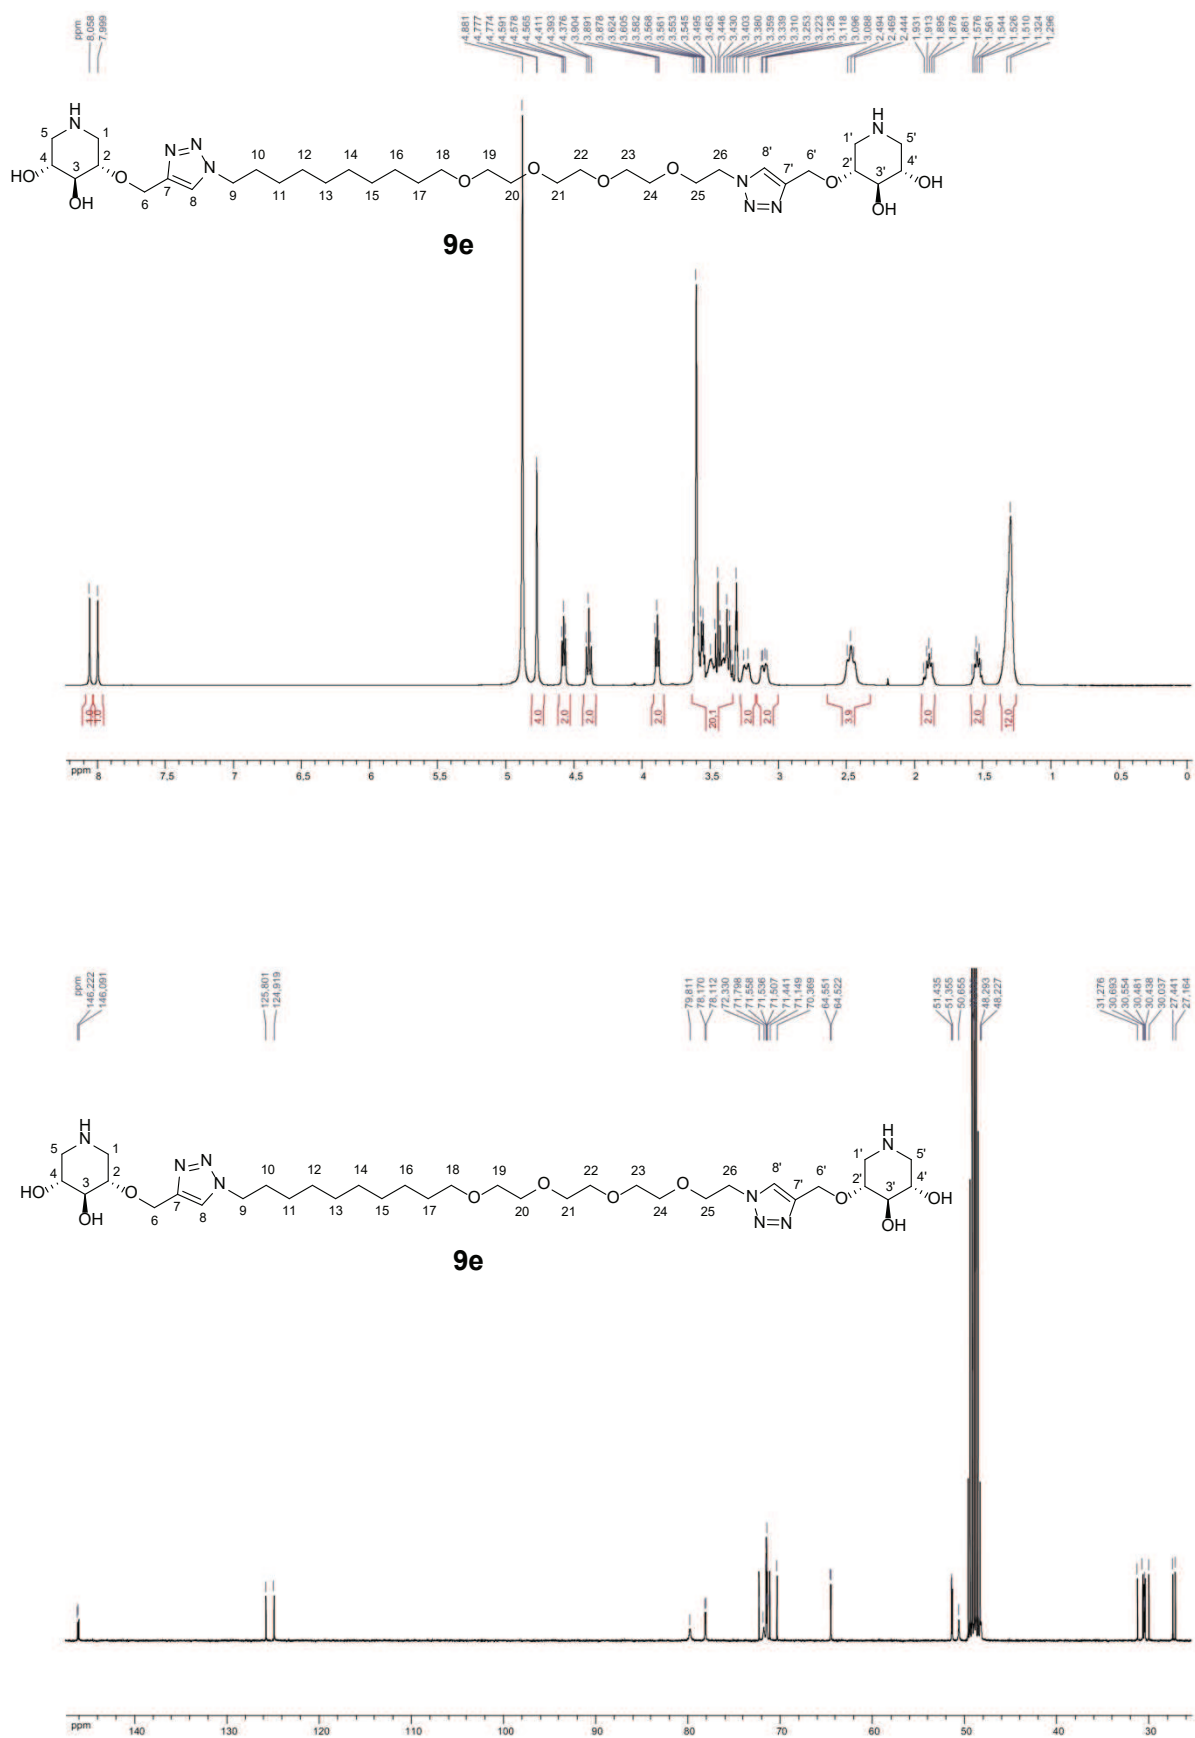

**Fig S35.** <sup>1</sup>H NMR (400 MHz, CD<sub>3</sub>OD) and <sup>13</sup>C (100 MHz, CD<sub>3</sub>OD) spectra of compound 9e.



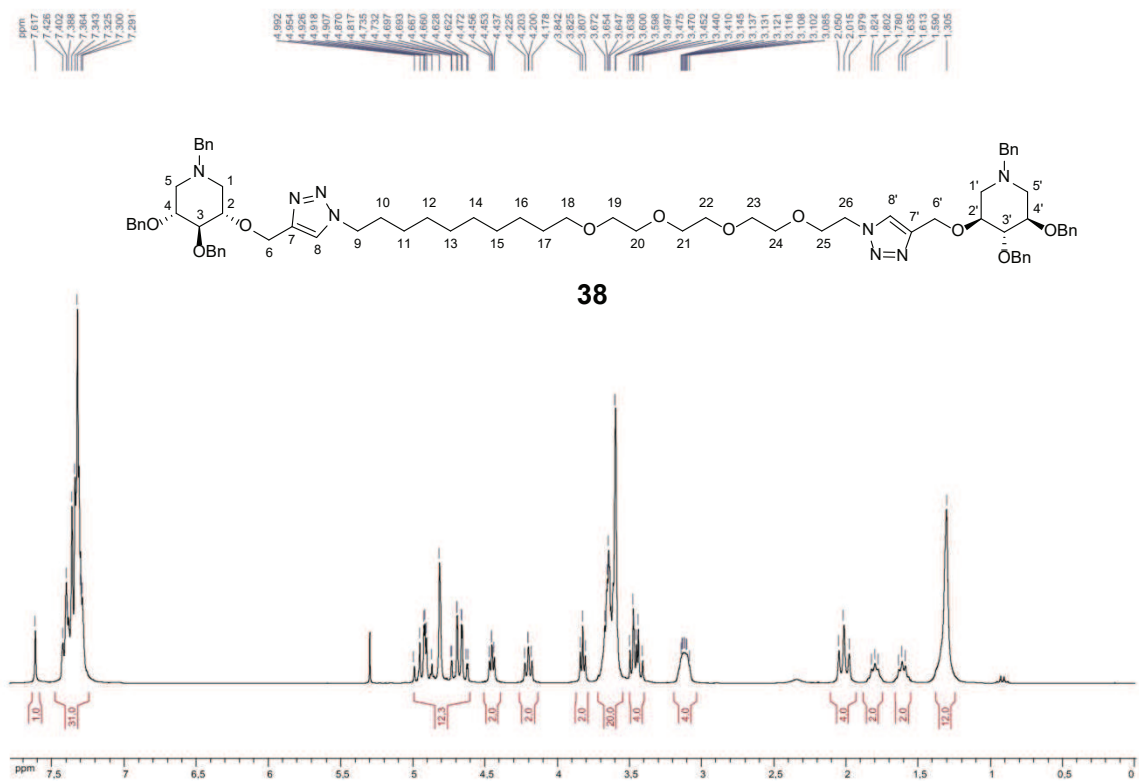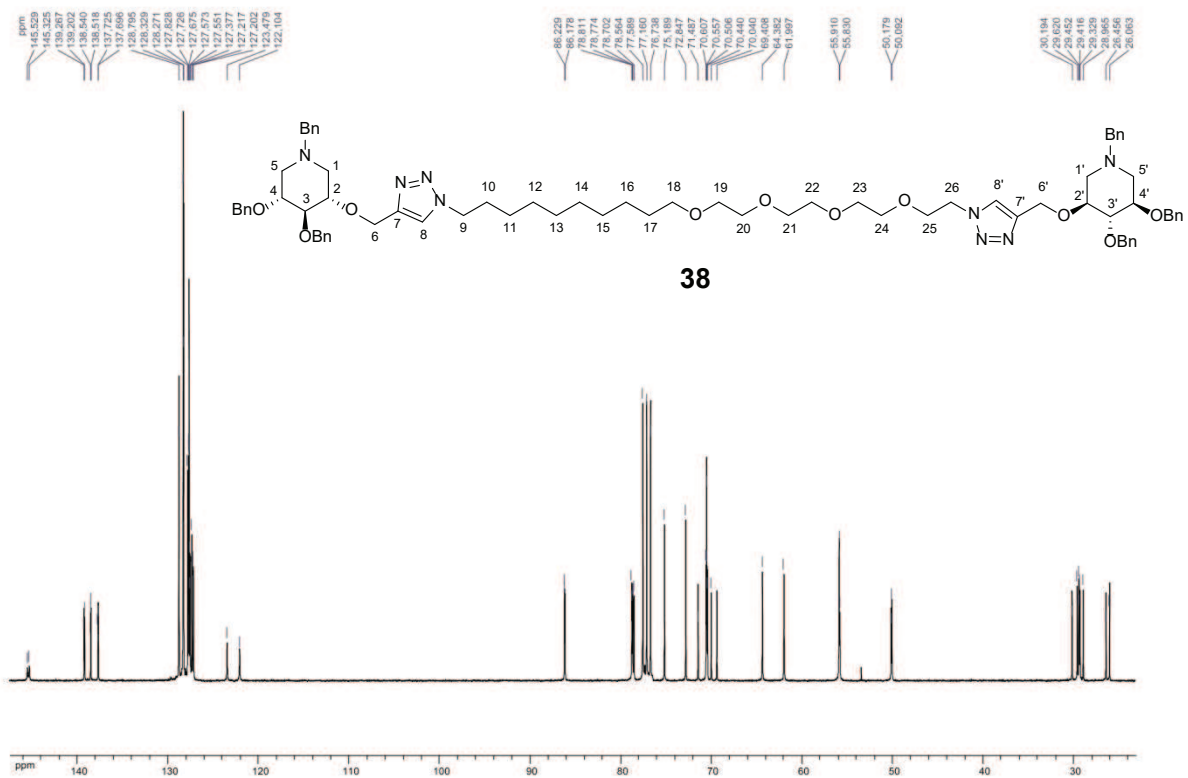

**Fig S36.** <sup>1</sup>H NMR (300 MHz, CDCl<sub>3</sub>) and <sup>13</sup>C (75.5 MHz, CDCl<sub>3</sub>) spectra of compound **38**.

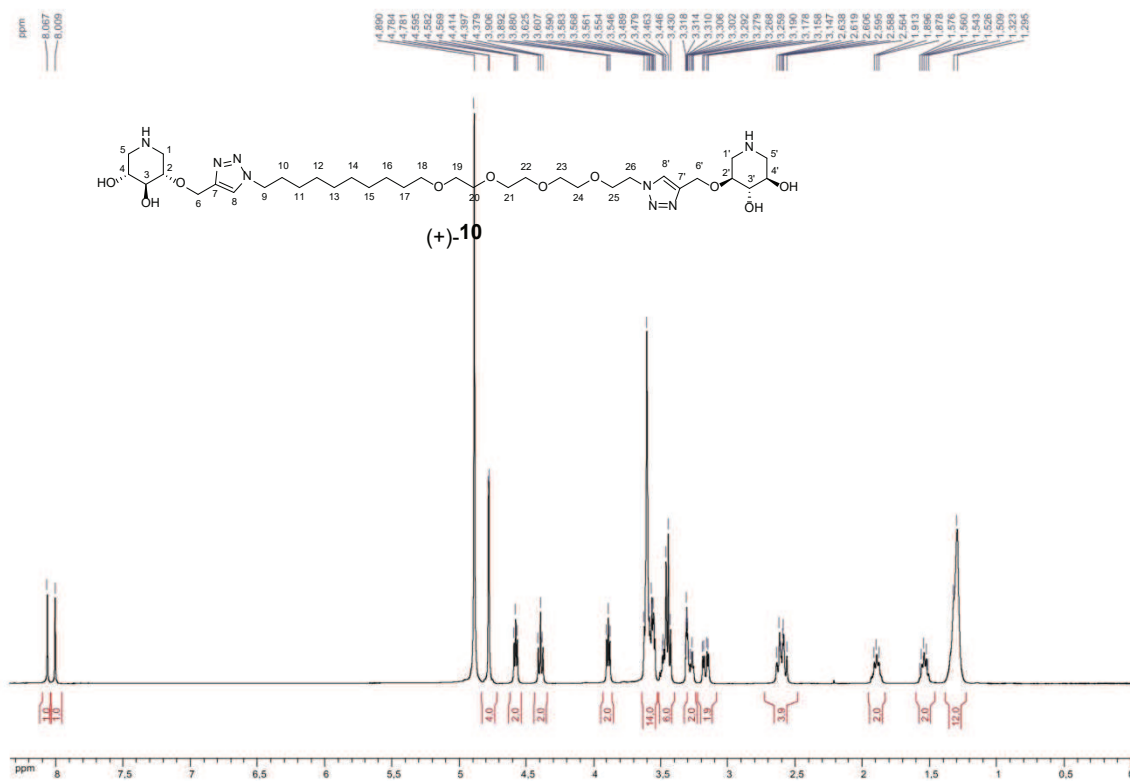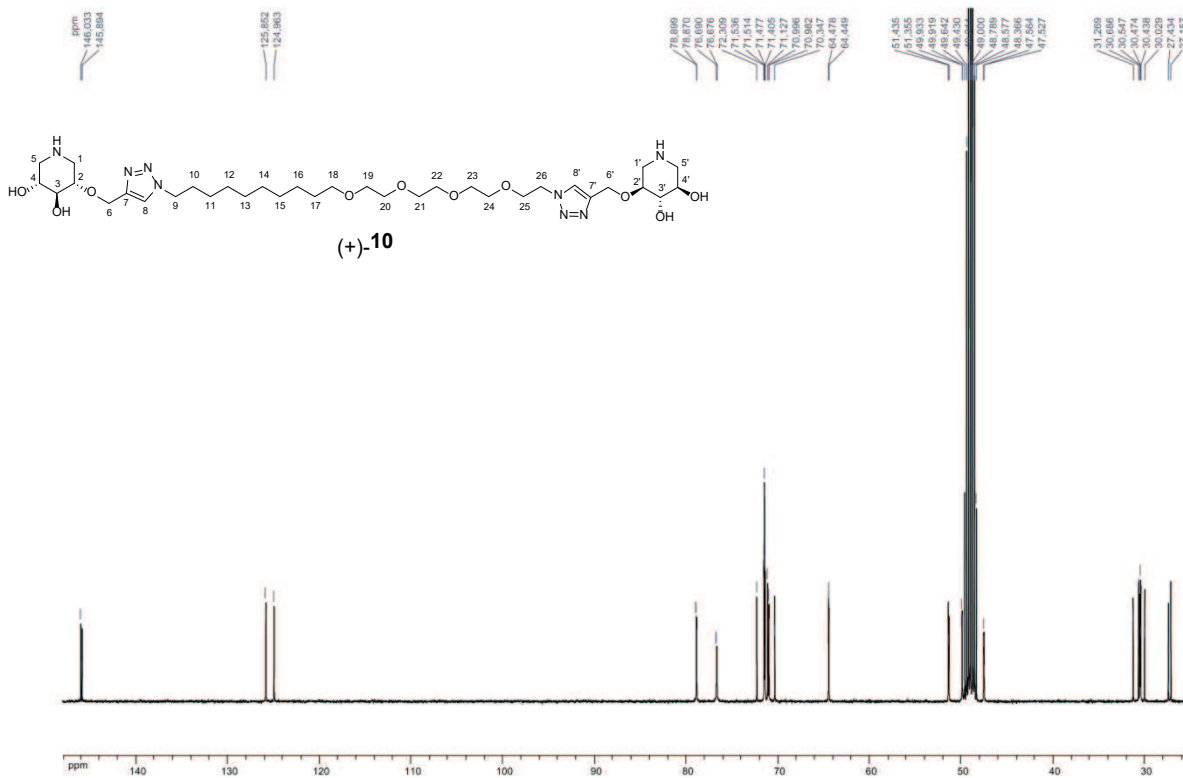

**Fig S37.**  $^1\text{H}$  NMR (400 MHz,  $\text{CD}_3\text{OD}$ ) and  $^{13}\text{C}$  (100 MHz,  $\text{CD}_3\text{OD}$ ) spectra of compound (+)-10.

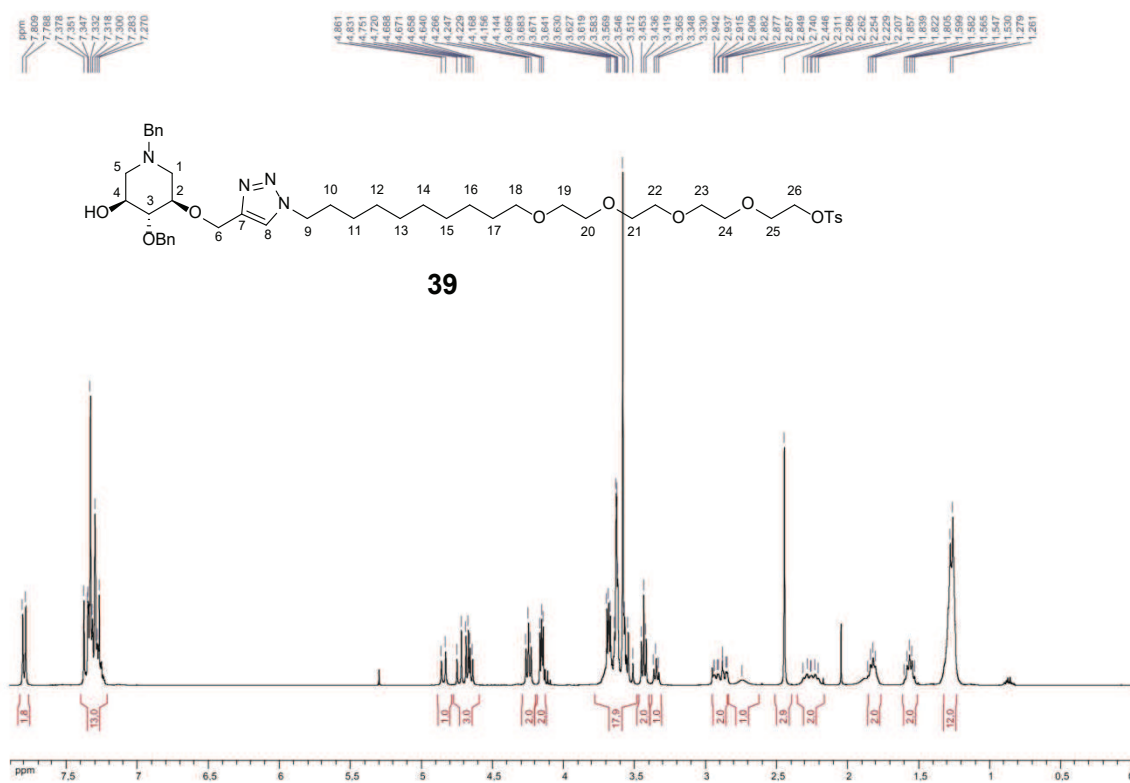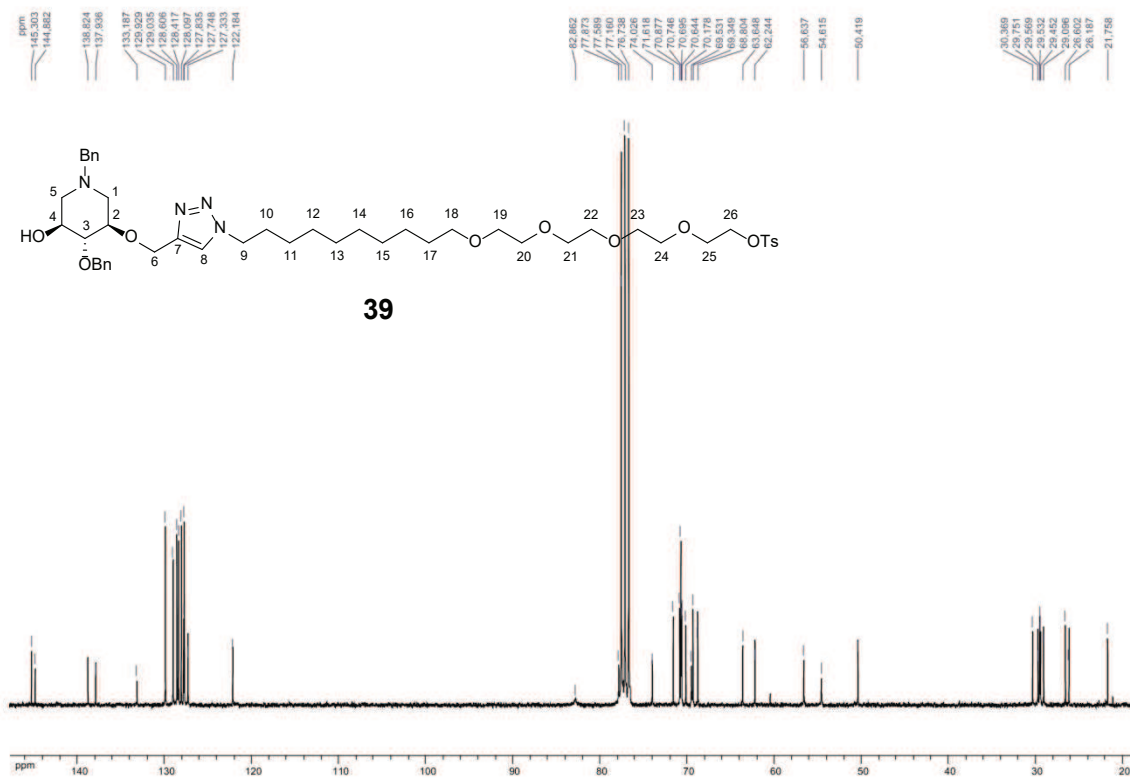

**Fig S38.**  $^1\text{H}$  NMR (400 MHz,  $\text{CDCl}_3$ ) and  $^{13}\text{C}$  (75.5 MHz,  $\text{CDCl}_3$ ) spectra of compound **39**.

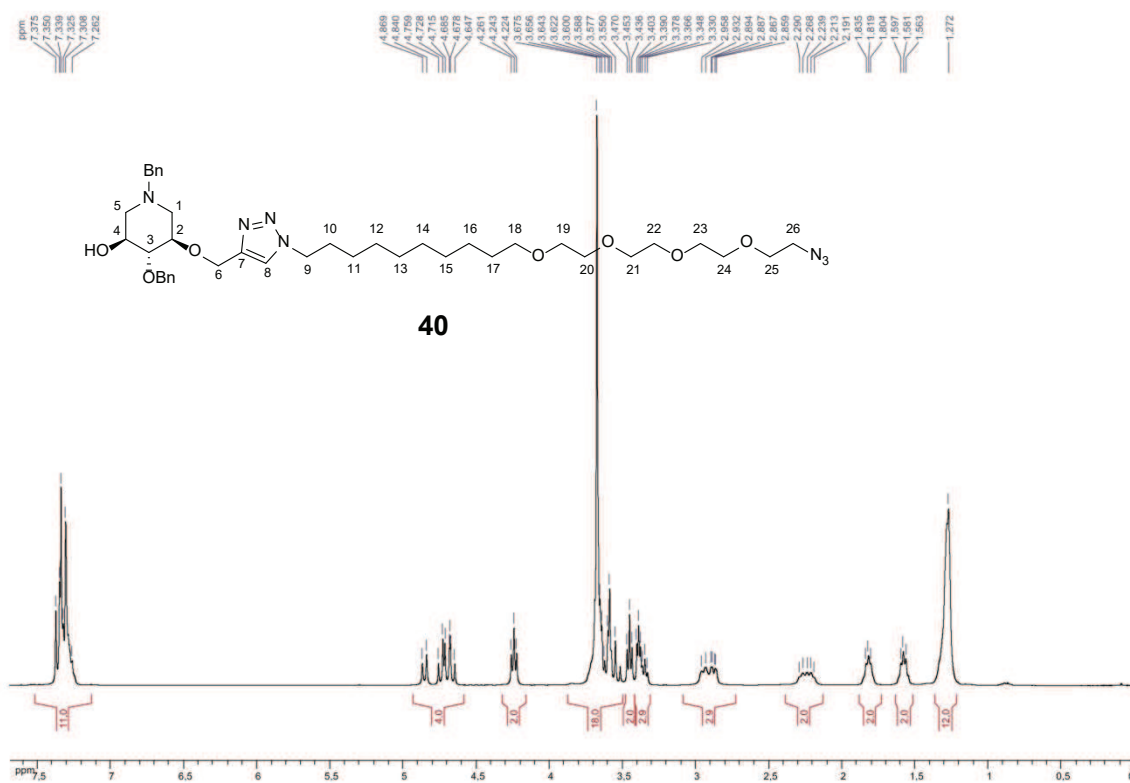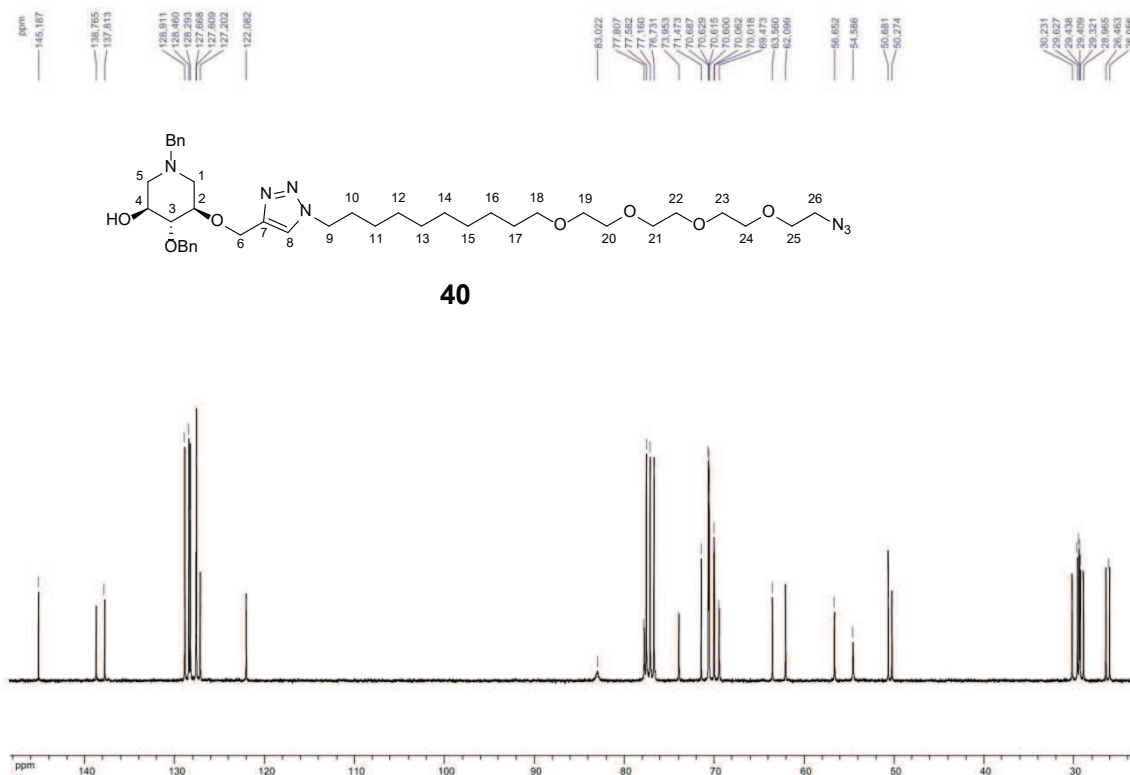

**Fig S39.**  $^1\text{H}$  NMR (400 MHz,  $\text{CDCl}_3$ ) and  $^{13}\text{C}$  (75.5 MHz,  $\text{CDCl}_3$ ) spectra of compound **40**.

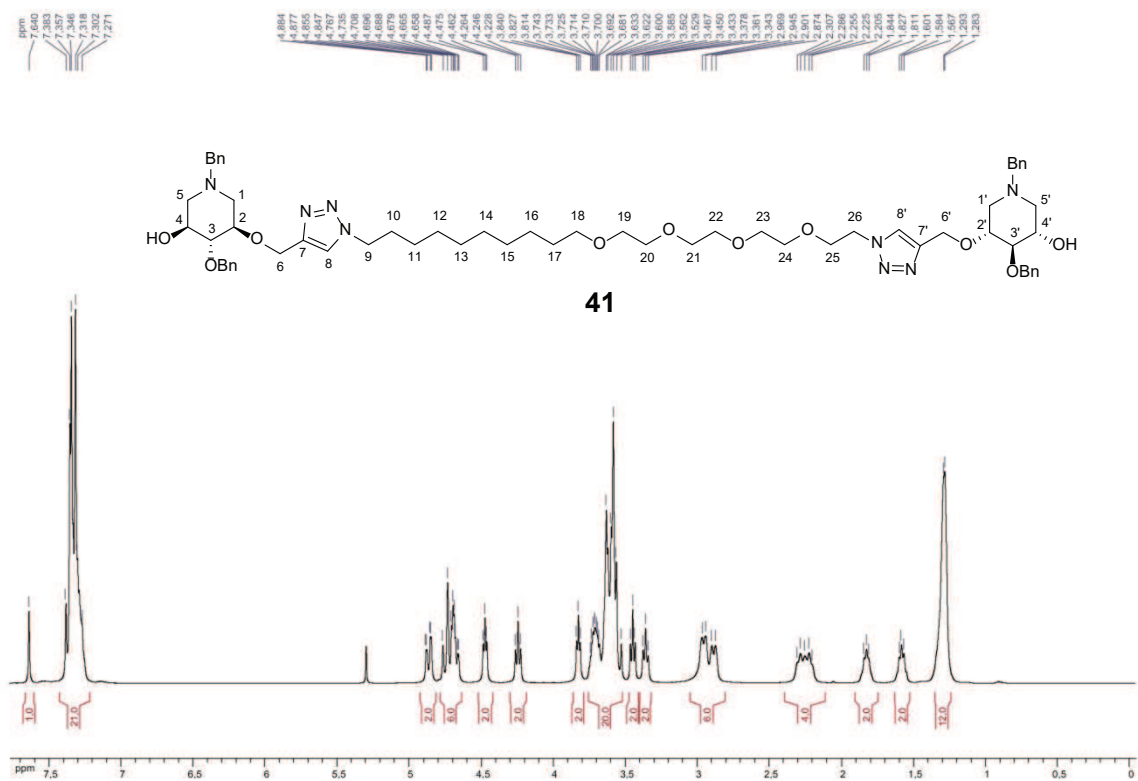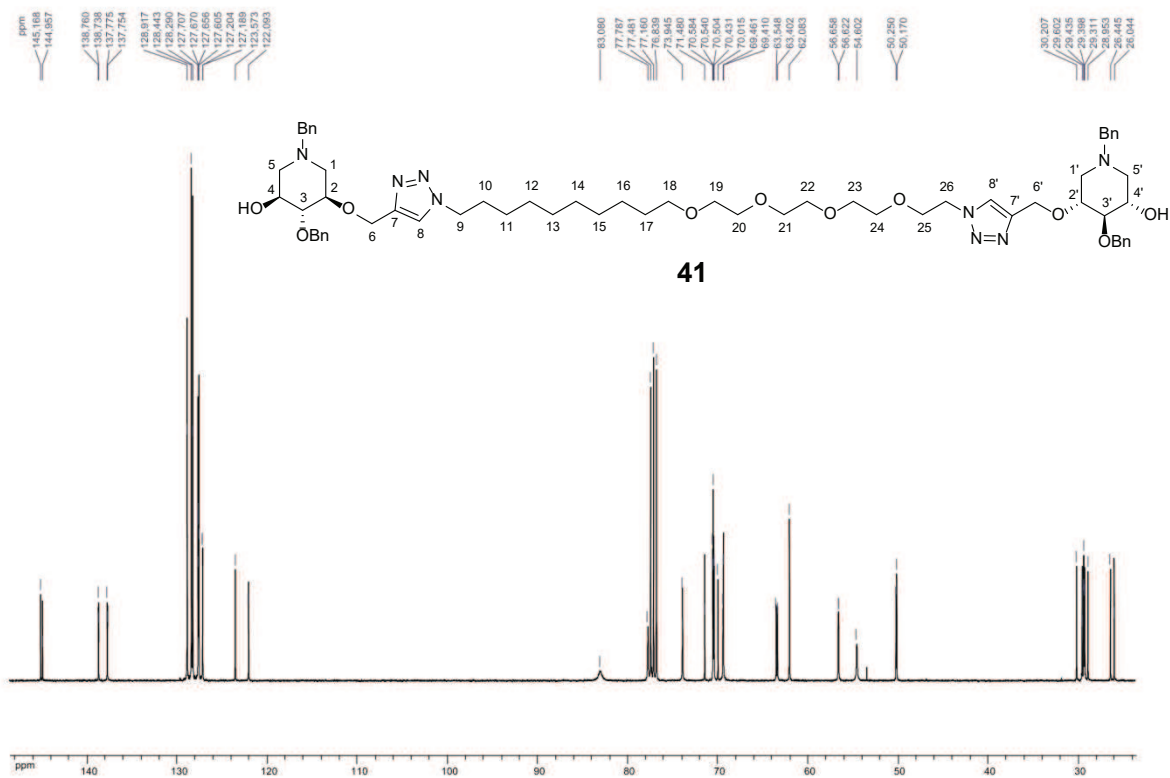

**Fig S40.**  $^1\text{H}$  NMR (400 MHz,  $\text{CDCl}_3$ ) and  $^{13}\text{C}$  (100 MHz,  $\text{CDCl}_3$ ) spectra of compound **41**.

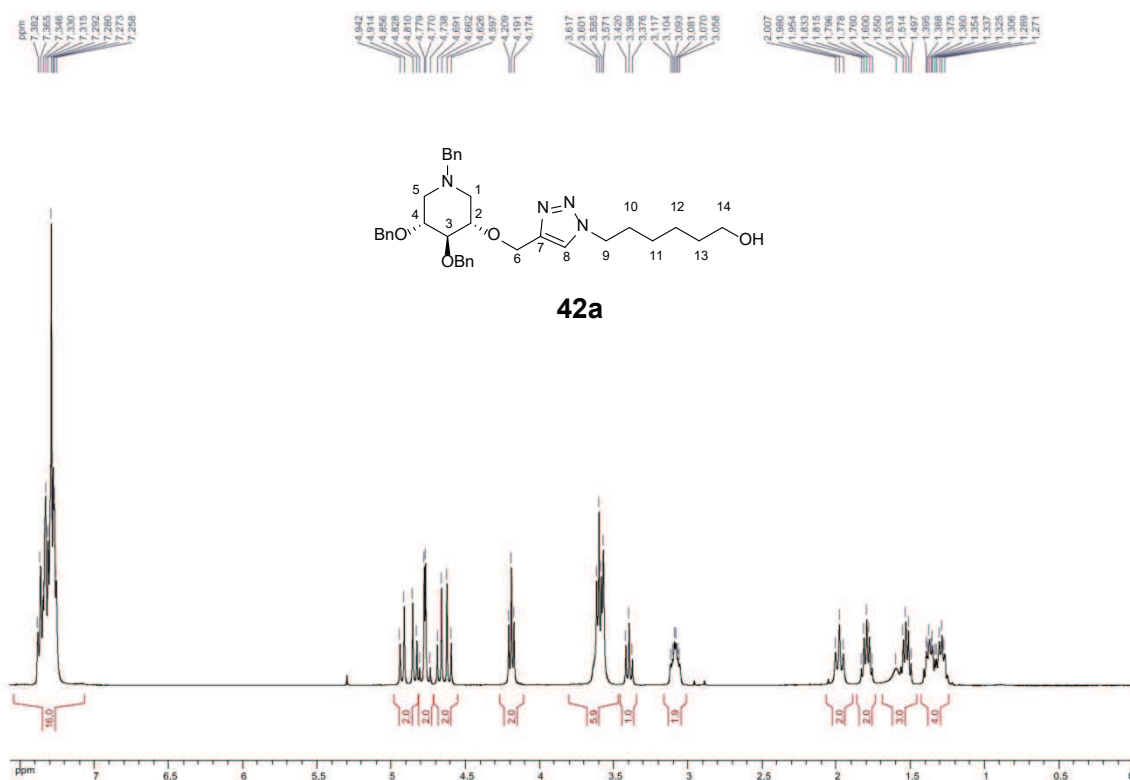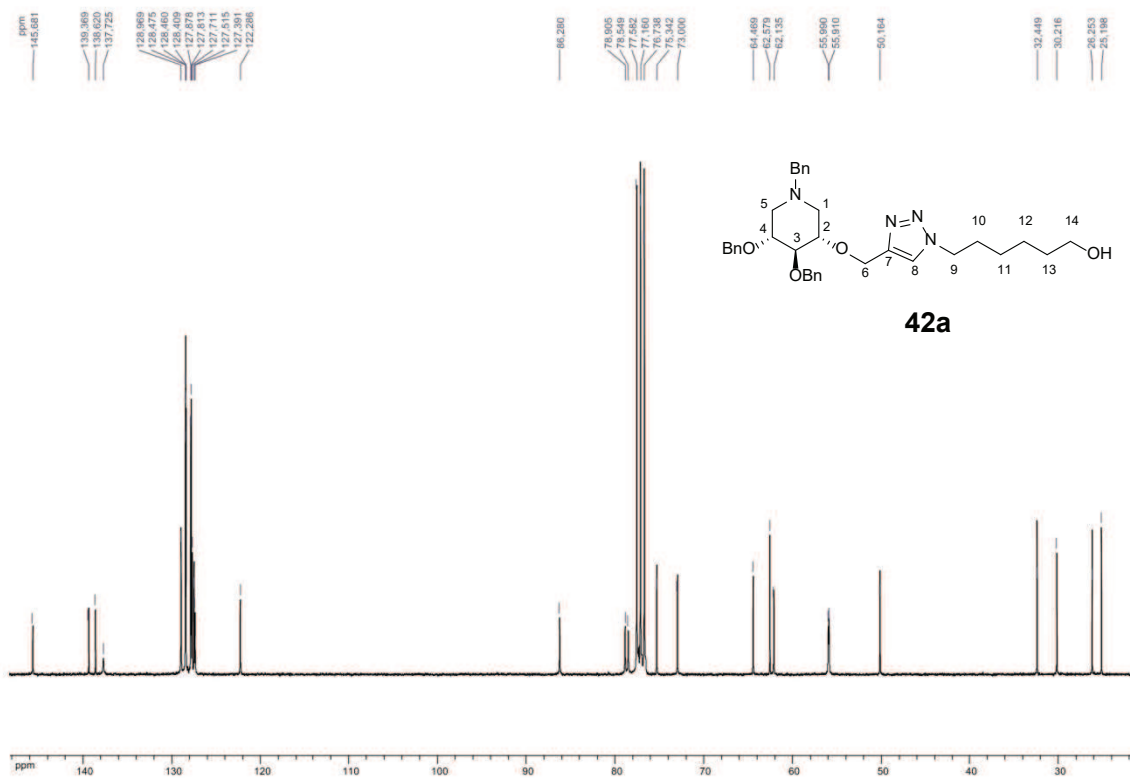

**Fig S41.** <sup>1</sup>H NMR (400 MHz, CDCl<sub>3</sub>) and <sup>13</sup>C (75.5 MHz, CDCl<sub>3</sub>) spectra of compound **42a**.



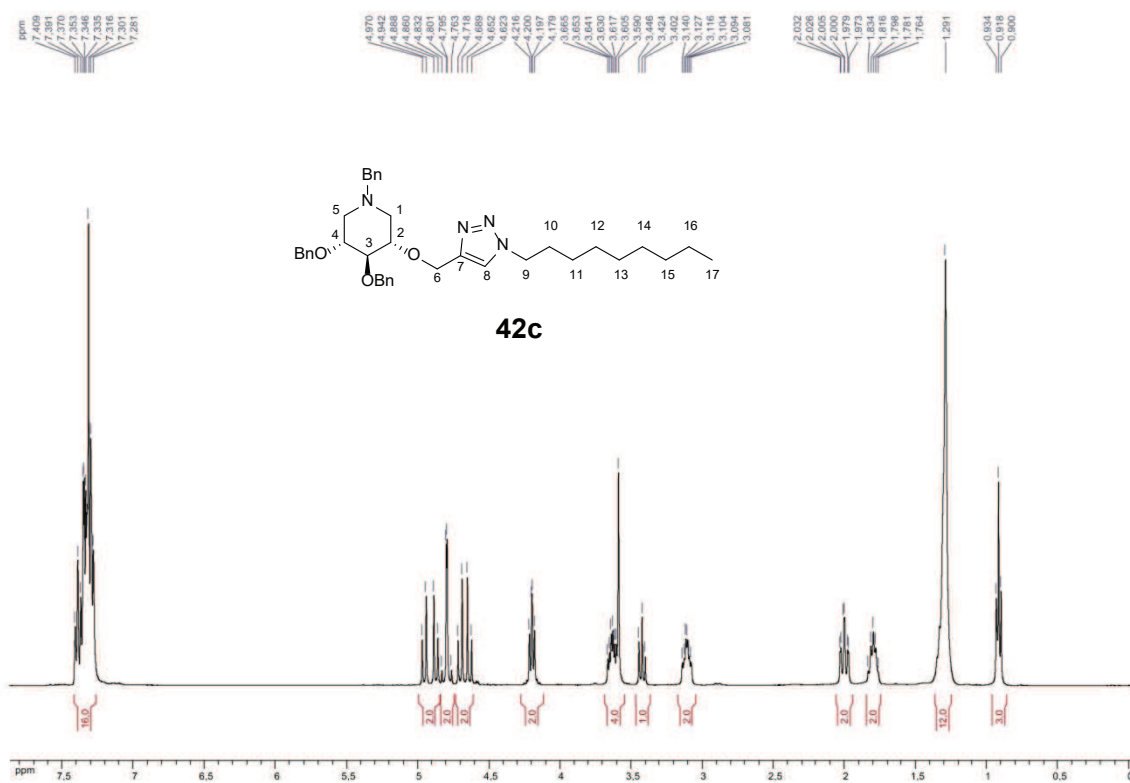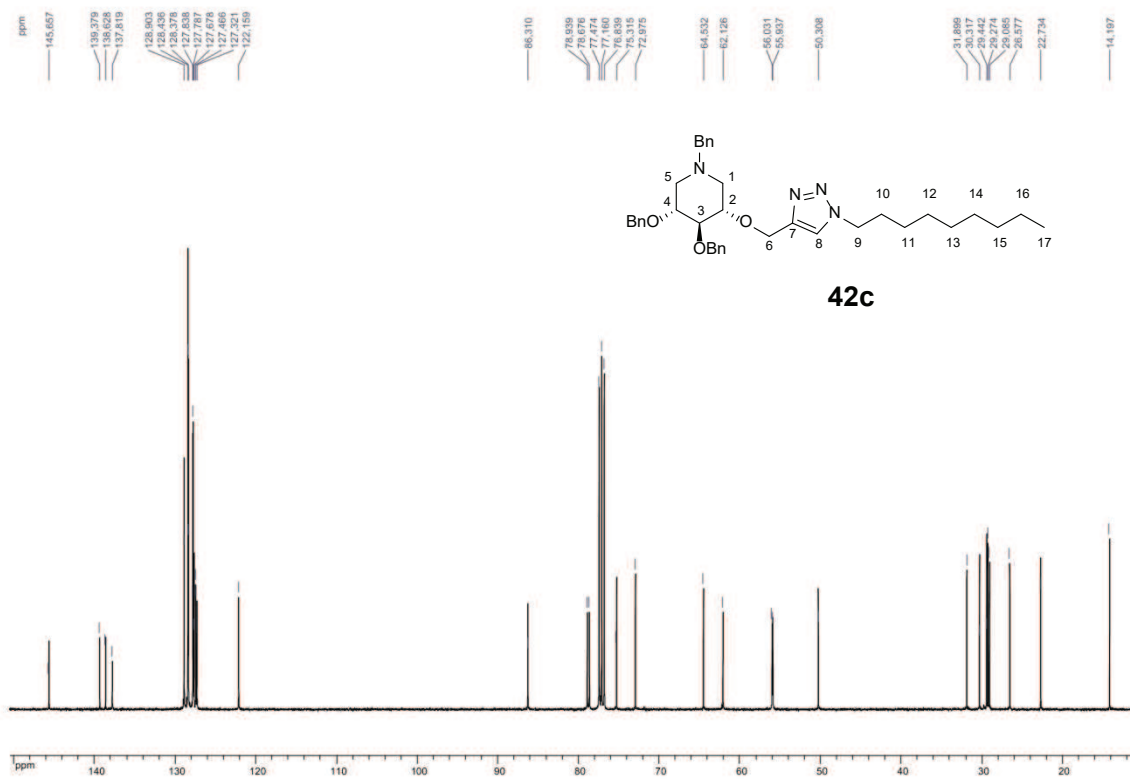

**Fig S43.** <sup>1</sup>H NMR (400 MHz, CDCl<sub>3</sub>) and <sup>13</sup>C (100 MHz, CDCl<sub>3</sub>) spectra of compound **42c**.



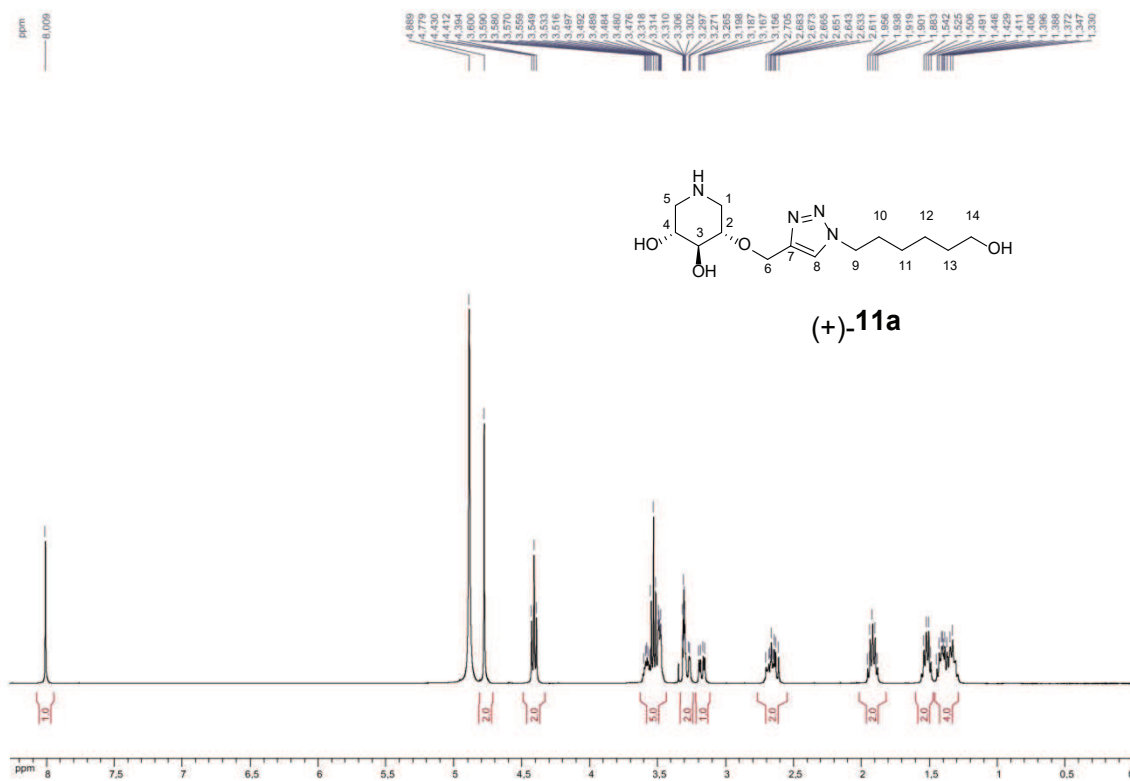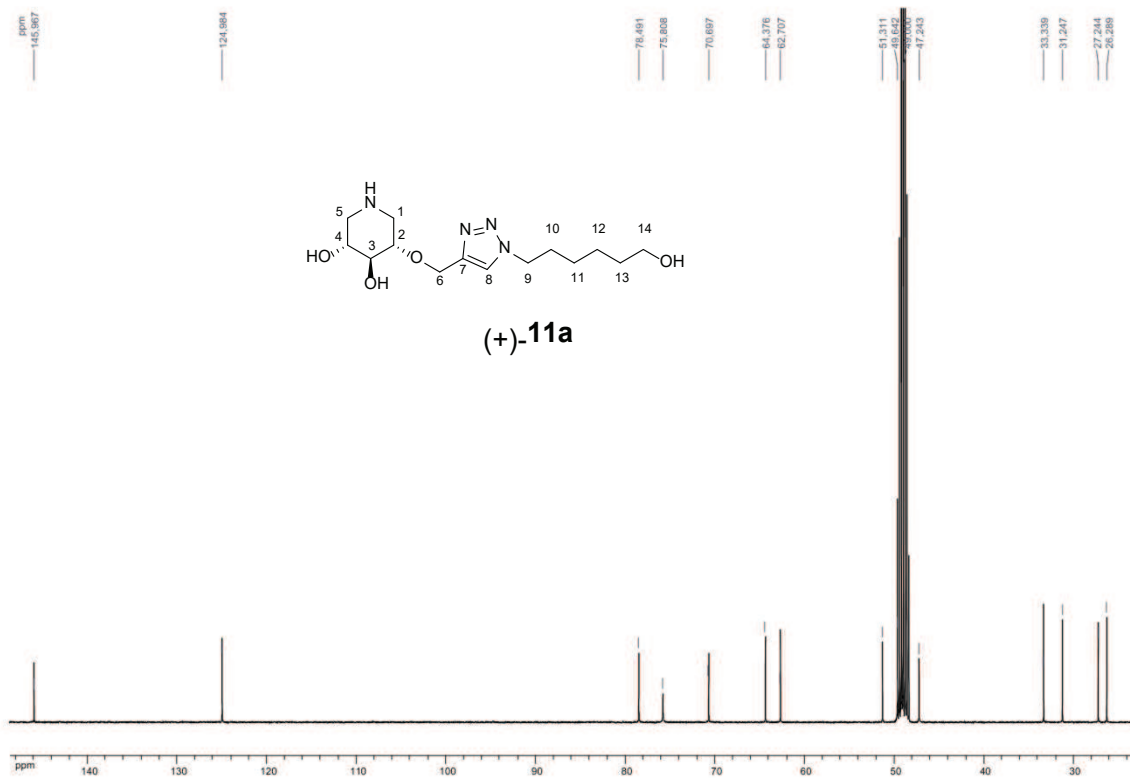

**Fig S44.**  $^1\text{H}$  NMR (400 MHz,  $\text{CD}_3\text{OD}$ ) and  $^{13}\text{C}$  (100 MHz,  $\text{CD}_3\text{OD}$ ) spectra of compound (+)-11a.

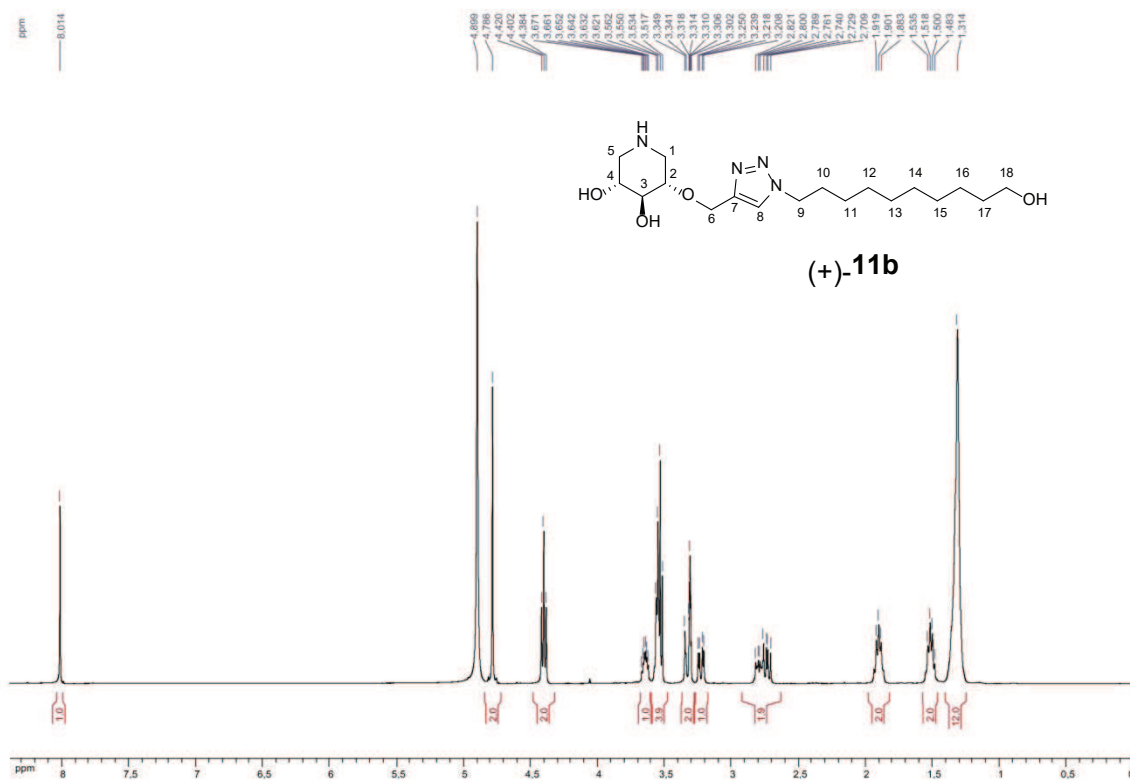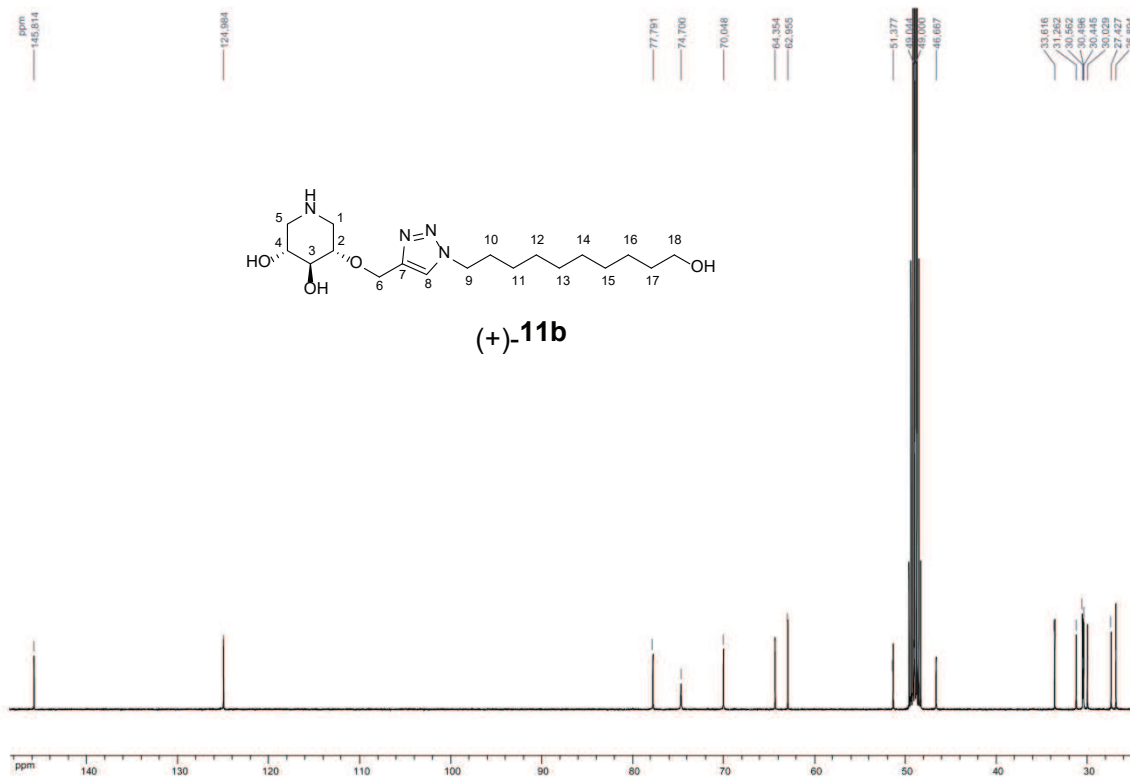

**Fig S45.**  $^1\text{H}$  NMR (400 MHz,  $\text{CD}_3\text{OD}$ ) and  $^{13}\text{C}$  (100 MHz,  $\text{CD}_3\text{OD}$ ) spectra of compound (+)-11b.

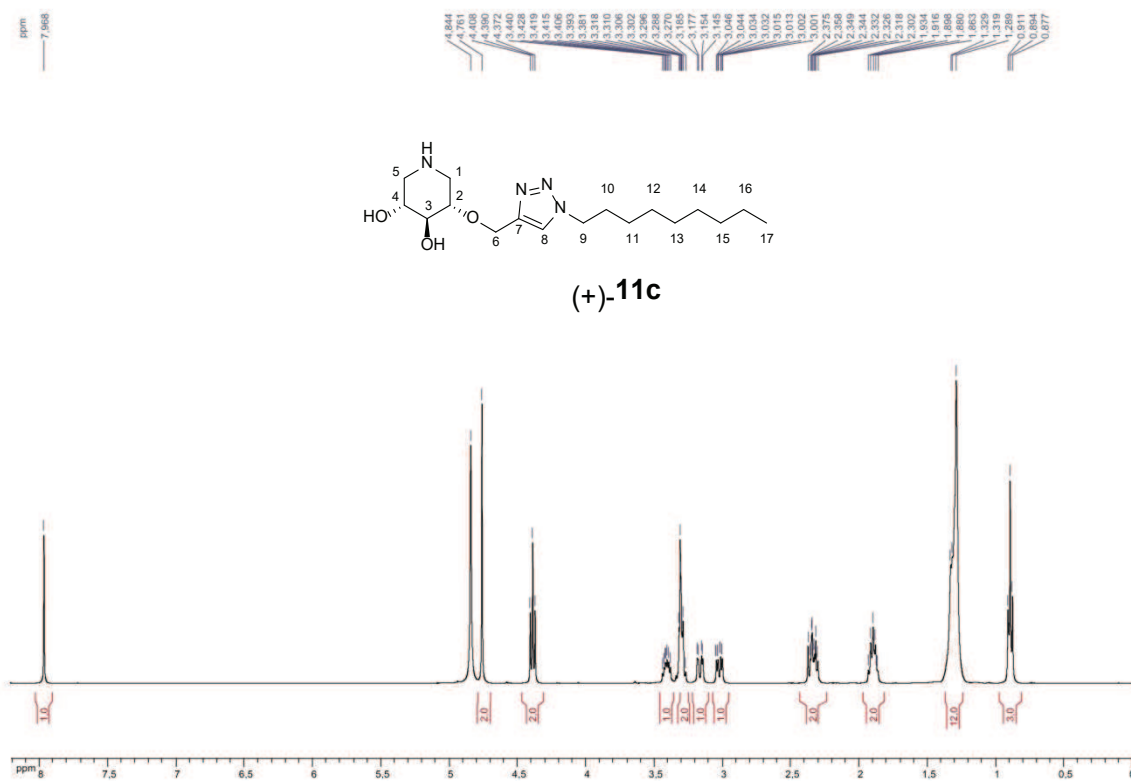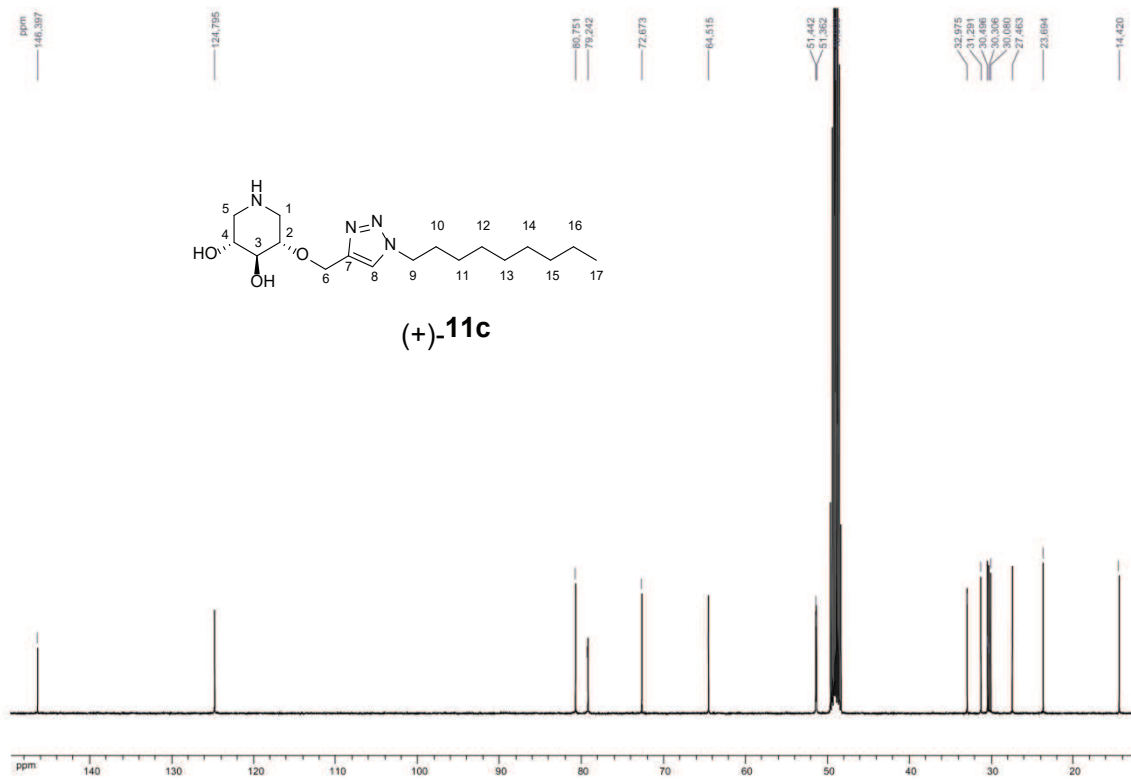

**Fig S46.**  $^1\text{H}$  NMR (400 MHz,  $\text{CD}_3\text{OD}$ ) and  $^{13}\text{C}$  (100 MHz,  $\text{CD}_3\text{OD}$ ) spectra of compound (+)-11c.

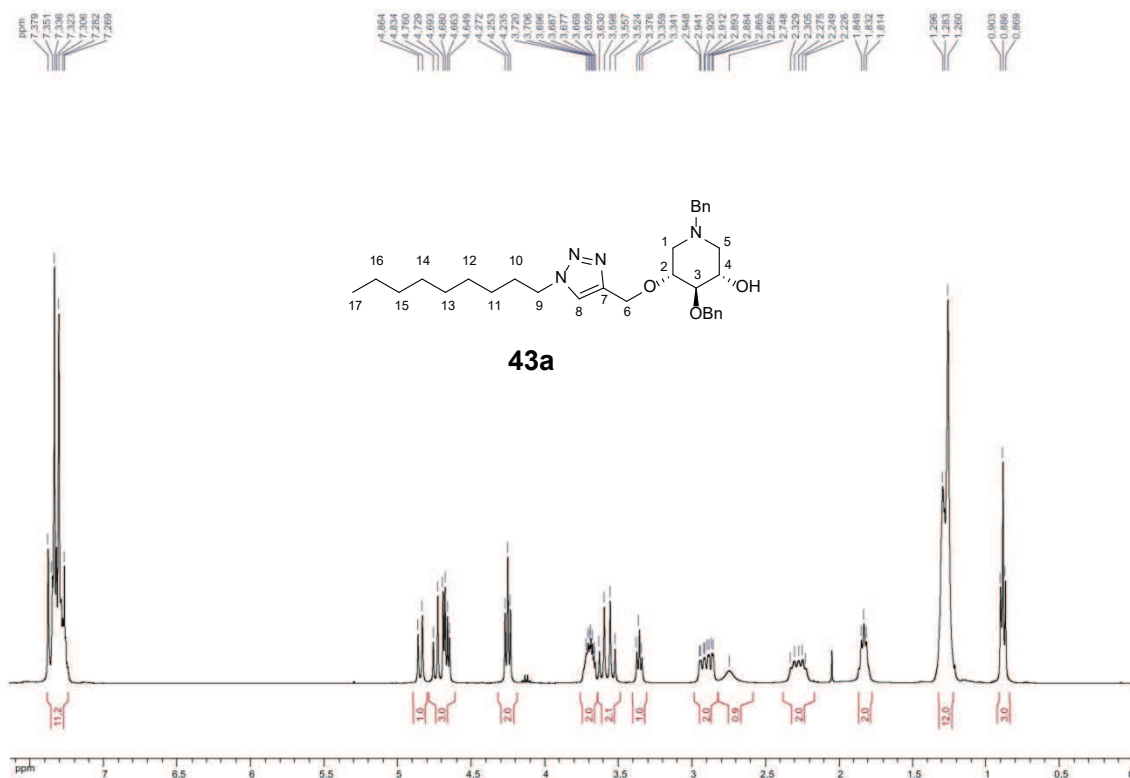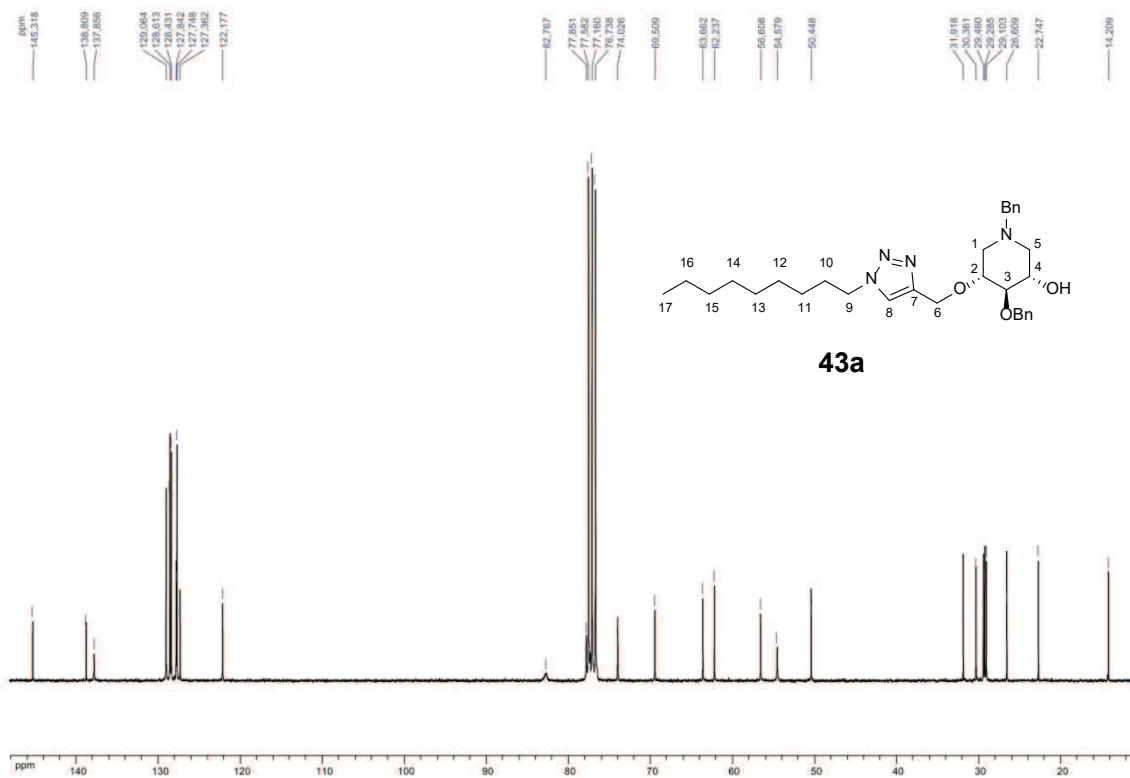

**Fig S47.**  $^1\text{H}$  NMR (400 MHz,  $\text{CDCl}_3$ ) and  $^{13}\text{C}$  (75.5 MHz,  $\text{CDCl}_3$ ) spectra of compound **43a**.

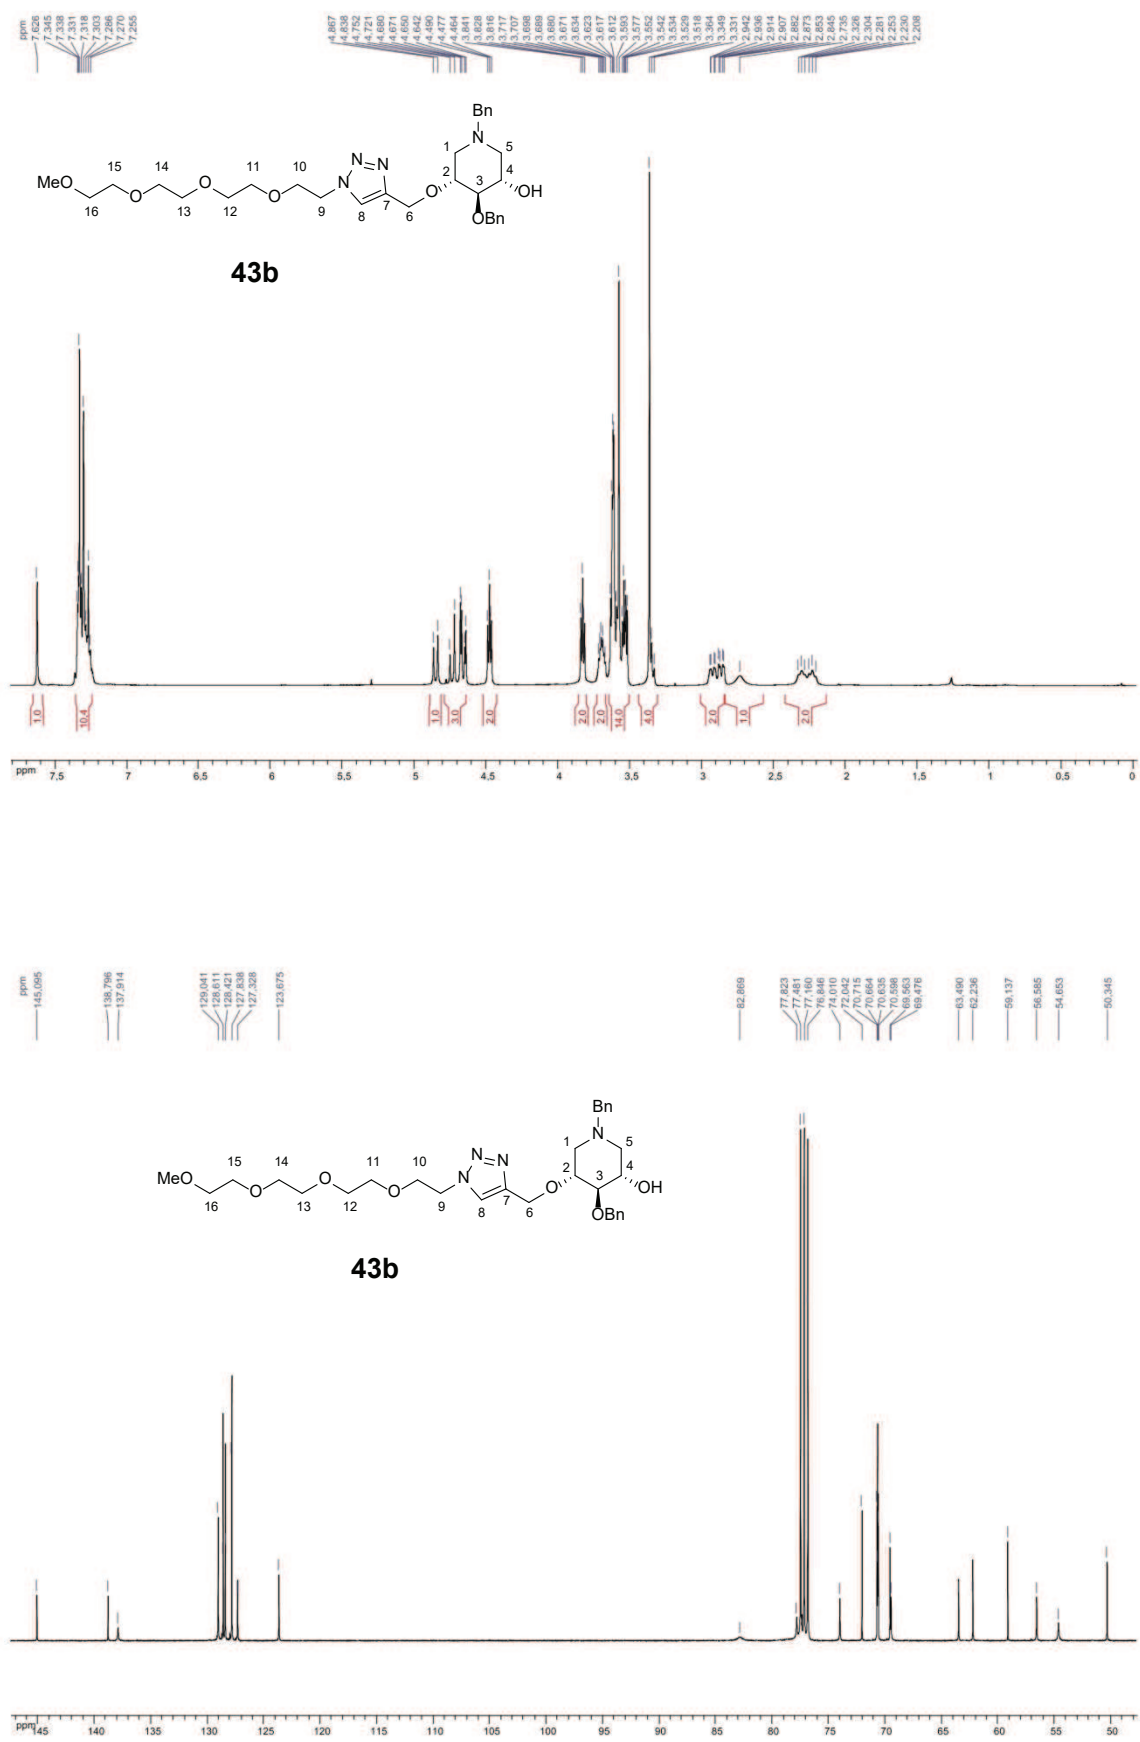

**Fig S48.** <sup>1</sup>H NMR (400 MHz, CDCl<sub>3</sub>) and <sup>13</sup>C (100 MHz, CDCl<sub>3</sub>) spectra of compound **43b**.

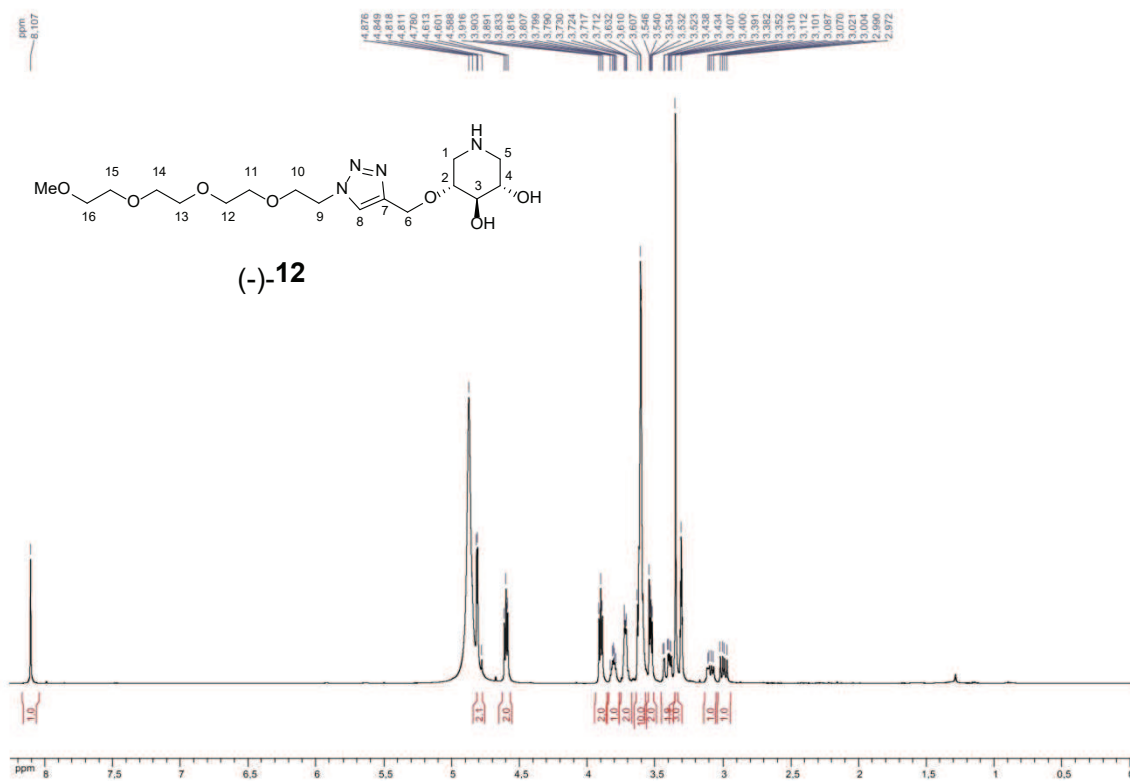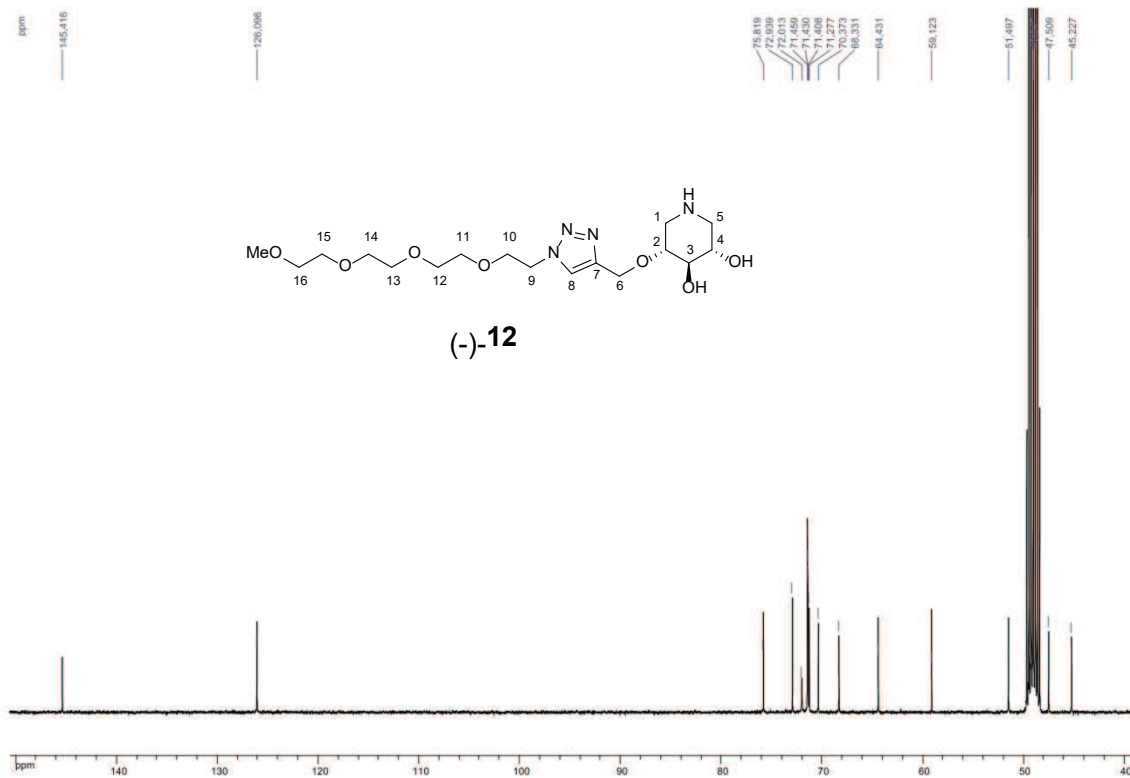

**Fig S49.**  $^1\text{H}$  NMR (400 MHz,  $\text{CD}_3\text{OD}$ ) and  $^{13}\text{C}$  (100 MHz,  $\text{CD}_3\text{OD}$ ) spectra of compound (-)-12.

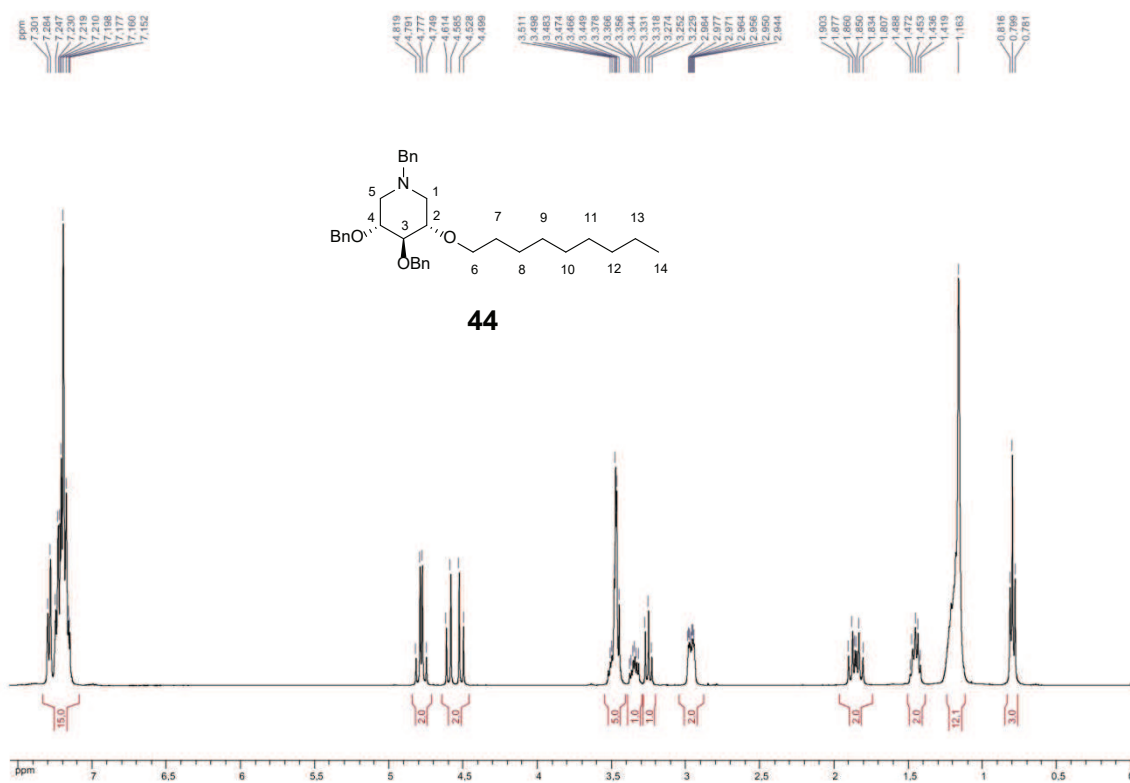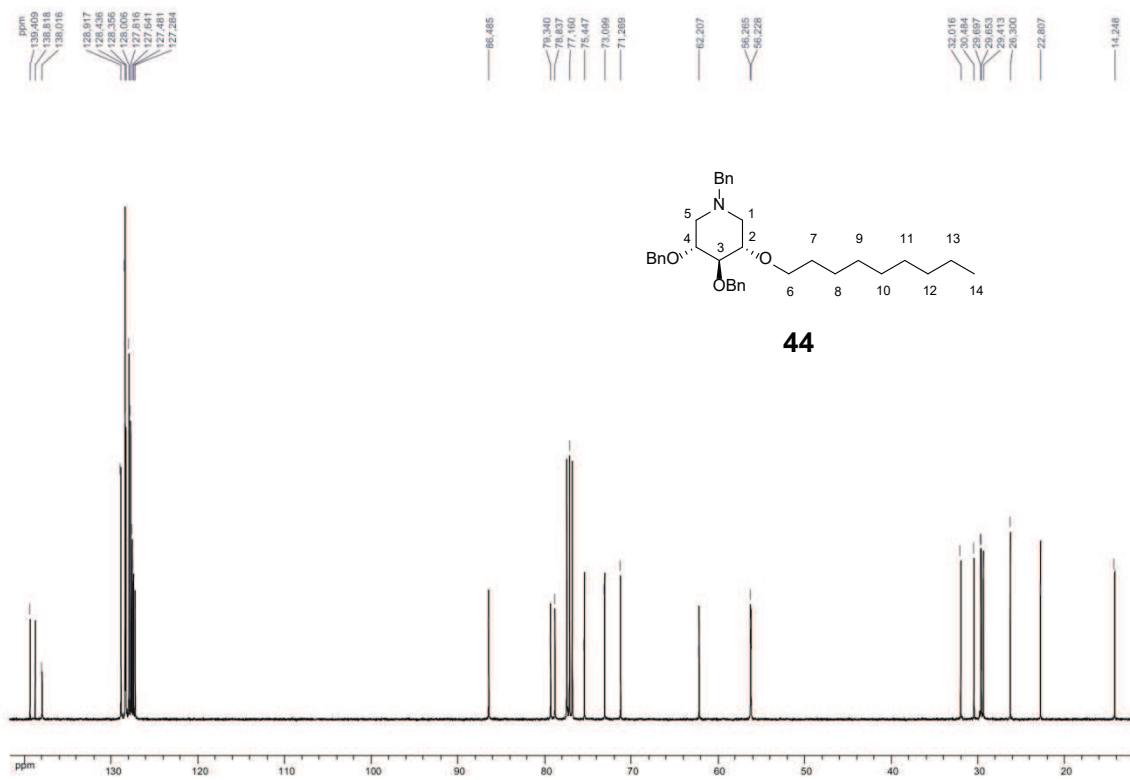

**Fig S50.** <sup>1</sup>H NMR (400 MHz, CDCl<sub>3</sub>) and <sup>13</sup>C (100 MHz, CDCl<sub>3</sub>) spectra of compound 44.

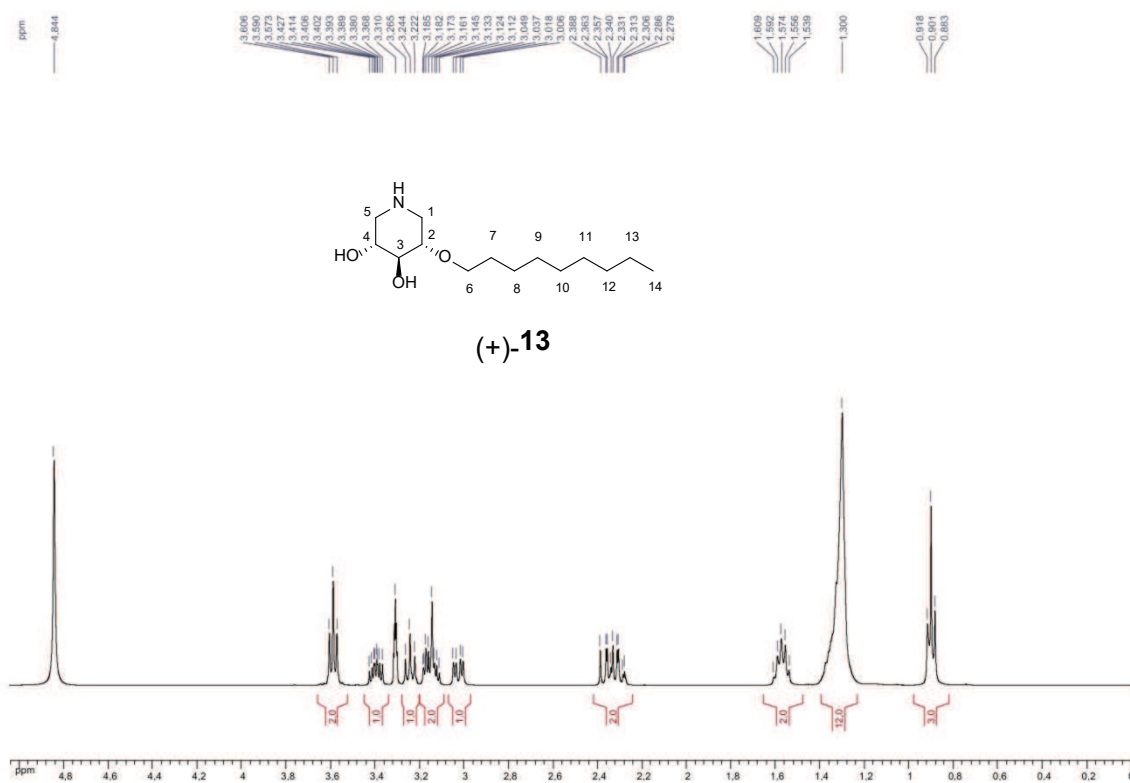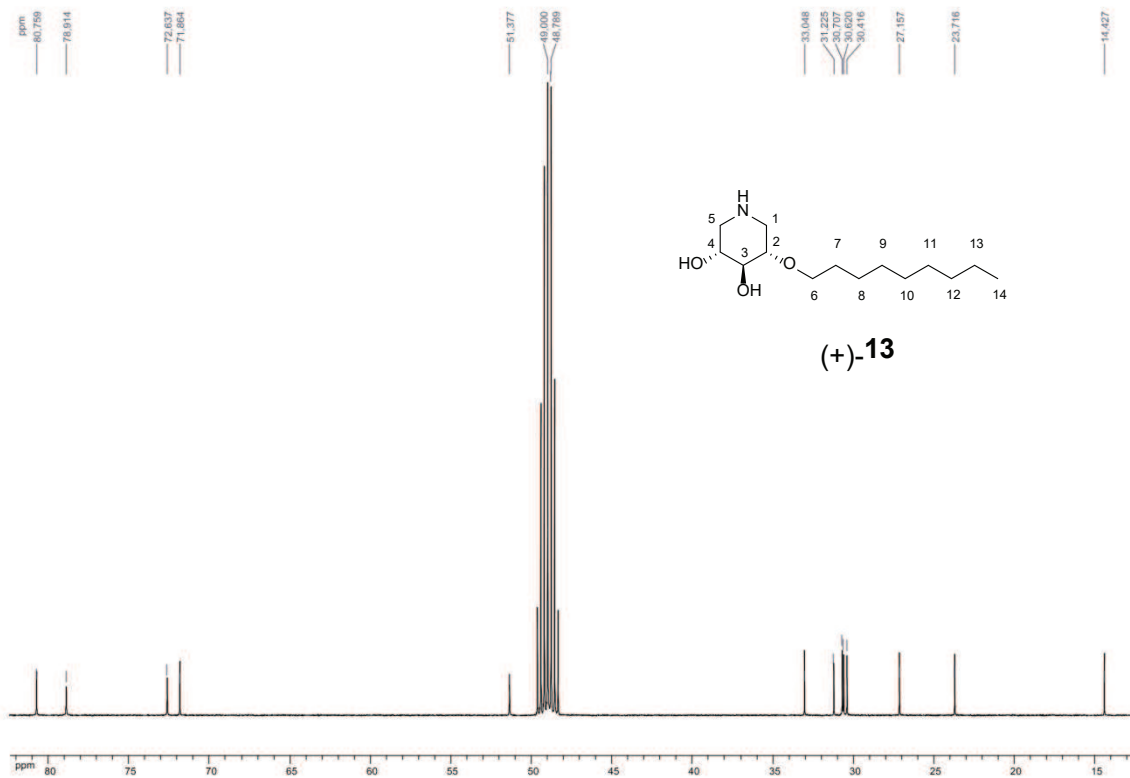

**Fig S51.**  $^1\text{H}$  NMR (400 MHz,  $\text{CD}_3\text{OD}$ ) and  $^{13}\text{C}$  (100 MHz,  $\text{CD}_3\text{OD}$ ) spectra of compound (+)-13.



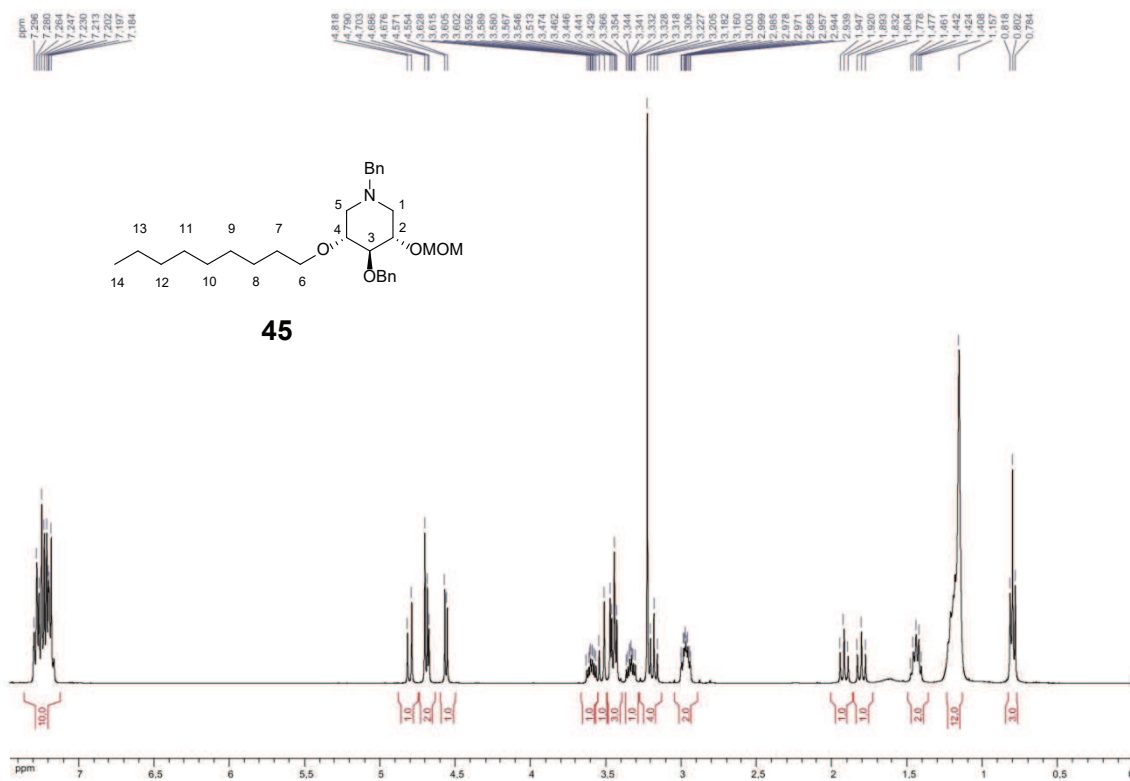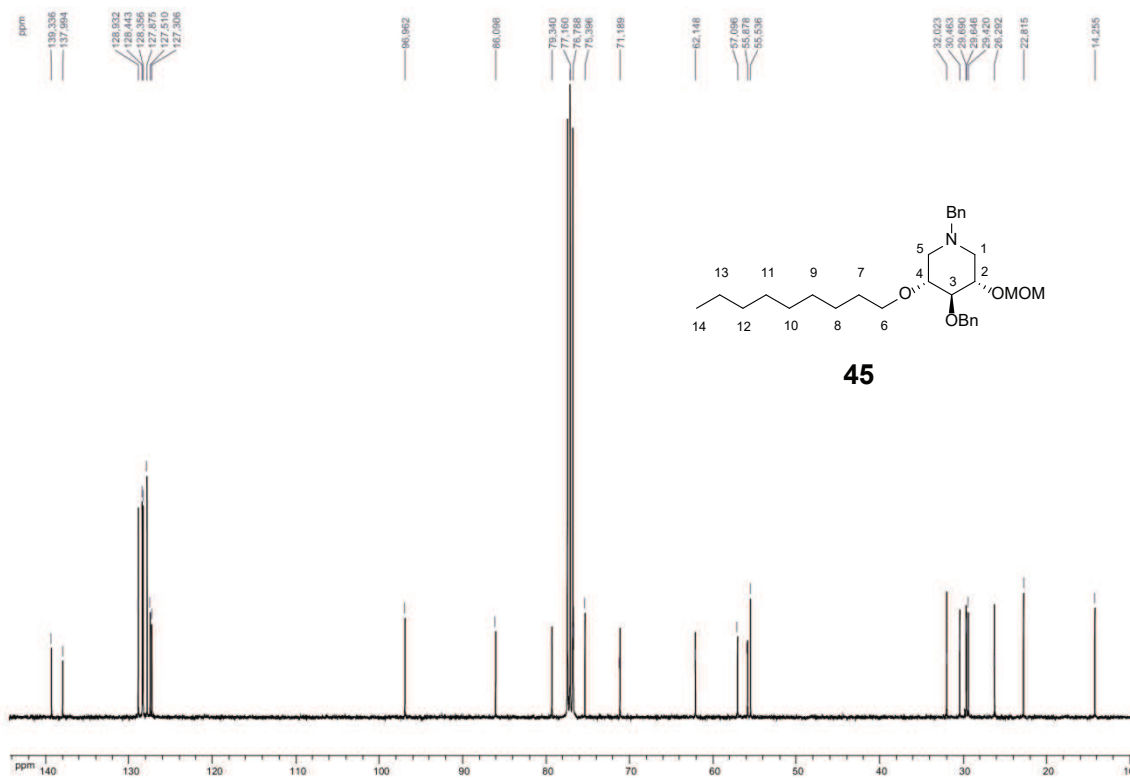

**Fig S52.** <sup>1</sup>H NMR (400 MHz, CDCl<sub>3</sub>) and <sup>13</sup>C (100 MHz, CDCl<sub>3</sub>) spectra of compound **45**.

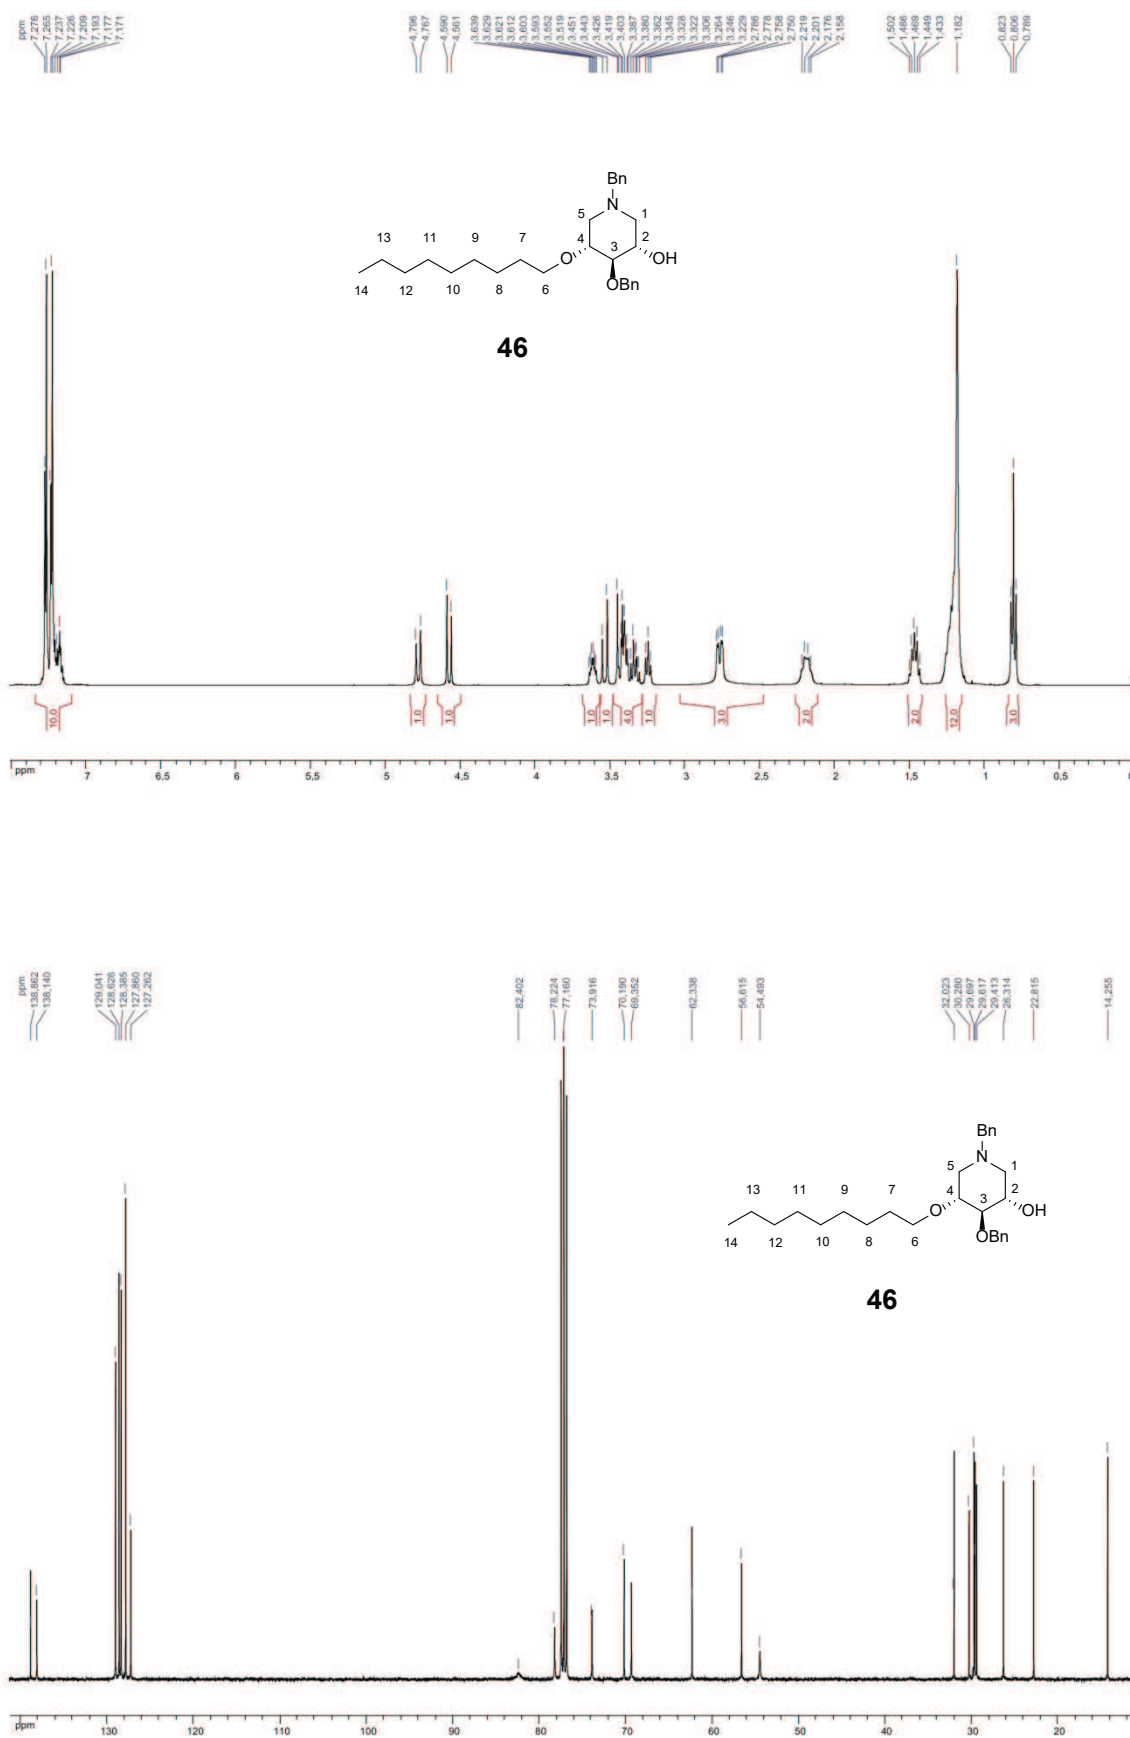

**Fig S53.** <sup>1</sup>H NMR (400 MHz, CDCl<sub>3</sub>) and <sup>13</sup>C (100 MHz, CDCl<sub>3</sub>) spectra of compound **46**.

## Biological evaluation

| Compound       | [ $\mu$ M] | $\beta$ -glucosidase | $\alpha$ -galactosidase | $\beta$ -galactosidase | $\alpha$ -glucosidase | $\beta$ -hexosaminidase |
|----------------|------------|----------------------|-------------------------|------------------------|-----------------------|-------------------------|
| <b>9c</b>      | 0.1        | 93.05 $\pm$ 7.38     | 89.34 $\pm$ 8.28        | 94.20 $\pm$ 10.81      | 111.49 $\pm$ 18.40    | 88.45 $\pm$ 1.03        |
|                | 1          | 78.21 $\pm$ 15.22    | 102.84 $\pm$ 7.31       | 99.50 $\pm$ 10.81      | 110.19 $\pm$ 9.81     | 79.82 $\pm$ 9.97*       |
| <b>(+)-11b</b> | 0.1        | 68.07 $\pm$ 4.80     | 99.54 $\pm$ 5.84        | 103.12 $\pm$ 0.18      | 101.94 $\pm$ 5.96     | 90.32 $\pm$ 3.76*       |
|                | 1          | 25.30 $\pm$ 3.15     | 107.24 $\pm$ 20.34      | 102.73 $\pm$ 5.83      | 101.17 $\pm$ 16.91    | 88.70 $\pm$ 11.09       |
| <b>9b</b>      | 0.1        | 95.37 $\pm$ 7.62     | 108.24 $\pm$ 11.36      | 95.75 $\pm$ 20.99      | 110.60 $\pm$ 10.70    | 96.42 $\pm$ 1.42        |
|                | 1          | 80.45 $\pm$ 4.52     | 103.71 $\pm$ 4.98       | 116.24 $\pm$ 11.45*    | 103.32 $\pm$ 4.12     | 95.56 $\pm$ 5.33        |
| <b>9e</b>      | 0.1        | 100.31 $\pm$ 3.99    | 96.01 $\pm$ 4.92        | 86.86 $\pm$ 2.25*      | 80.41 $\pm$ 1.22*     | 77.06 $\pm$ 1.66*       |
|                | 1          | 94.83 $\pm$ 1.55     | 89.66 $\pm$ 10.38       | 93.36 $\pm$ 2.84       | 71.43 $\pm$ 14.37*    | 78.34 $\pm$ 6.22*       |
| <b>(+)-10</b>  | 0.1        | 51.19 $\pm$ 1.27     | 84.82 $\pm$ 2.01*       | 77.94 $\pm$ 3.26       | 73.01 $\pm$ 9.44*     | 82.17 $\pm$ 3.89*       |
|                | 1          | 30.22 $\pm$ 2.55     | 81.30 $\pm$ 4.58*       | 69.04 $\pm$ 9.72*      | 66.00 $\pm$ 4.29*     | 68.72 $\pm$ 3.06*       |
| <b>(+)-13</b>  | 0.1        | 3.57 $\pm$ 0.28      | 97.36 $\pm$ 0.01        | 104.85 $\pm$ 1.04      | 100.05 $\pm$ 10.40    | 89.79 $\pm$ 6.66*       |
|                | 1          | 1.12 $\pm$ 0.07      | 93.65 $\pm$ 7.45        | 95.87 $\pm$ 1.92       | 91.62 $\pm$ 12.22     | 91.86 $\pm$ 11.32       |
| <b>(+)-11c</b> | 0.1        | 28.47 $\pm$ 3.66     | 94.57 $\pm$ 4.08        | 87.71 $\pm$ 6.74*      | 86.91 $\pm$ 1.06      | 87.32 $\pm$ 3.46*       |
|                | 1          | 1.55 $\pm$ 0.06      | 100.38 $\pm$ 3.98       | 42.57 $\pm$ 13.54      | 98.93 $\pm$ 13.39     | 91.03 $\pm$ 1.30        |

**Table S1 Activity towards glycosidases.**

Wild-type fibroblasts were treated for 6 days with selected compounds. Activity is normalized against untreated cells (0.1 % DMSO). Values are the median  $\pm$  confidence interval of 3 experiments. Statistically significant data ( $p < 0.05$ ) are denoted by an asterisk and are marked in color (yellow: inhibition; green: activation)

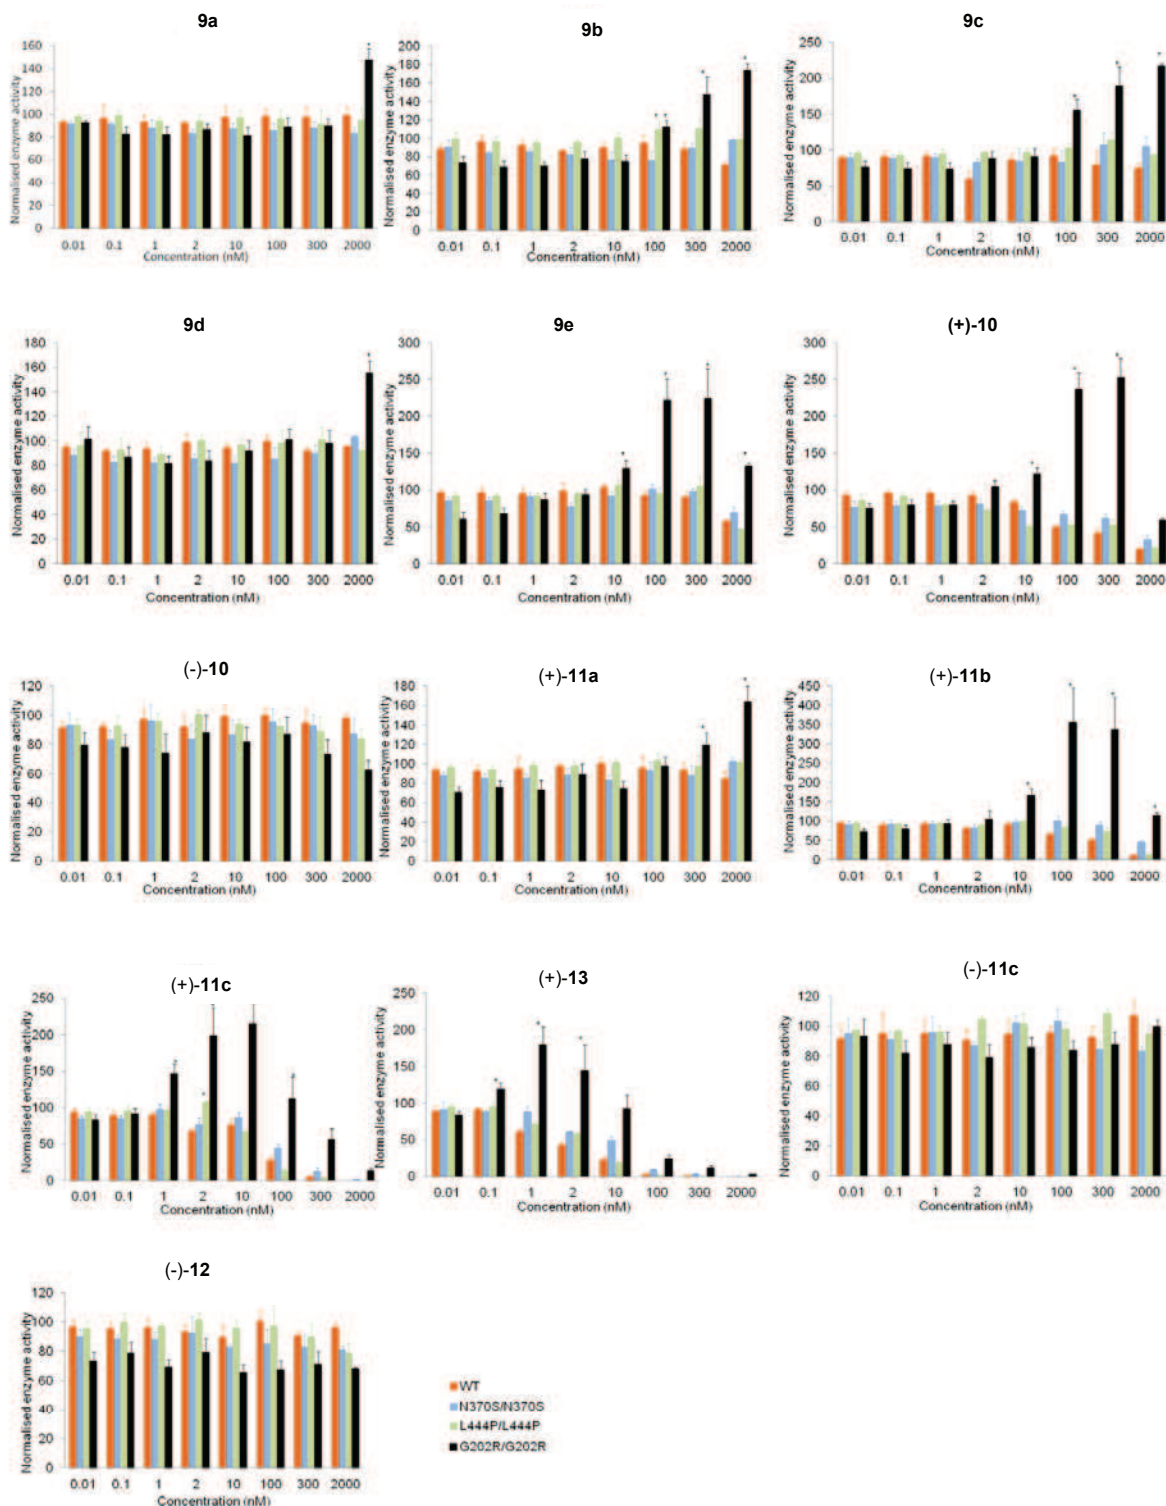

**Figure S54 GBA1 activity enhancement.** Normalized GBA1 activity of human fibroblast cell lines after treatment with compounds at the indicated concentrations, for 6 days. The normalized enzyme activity was calculated by the percentage between treated cells and untreated (0.1% DMSO) cells. Values are the Median  $\pm$  confidence interval of 3-6 separate experiments performed by triplicates. \* Values higher than 100 statistically different from values of fibroblast treated with vehicle ( $p \leq 0.05$ )

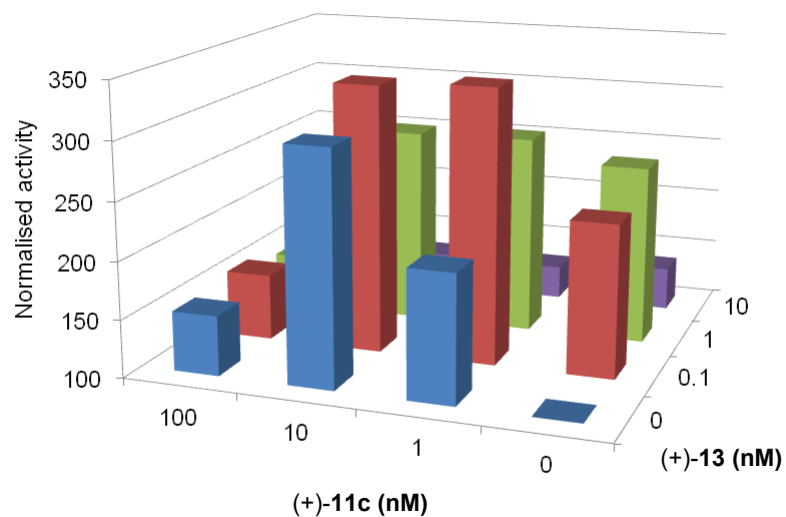

**Figure S55 Synergistic effect evaluation.** Normalised GBA1 activity of human fibroblast bearing the G202R/G202R mutation after treatment with compounds (+)-**11c** and (+)-**13** at the indicated concentrations, for 6 days. The normalised enzyme activity was calculated by the percentage between treated cells and untreated (0.1% DMSO) cells.

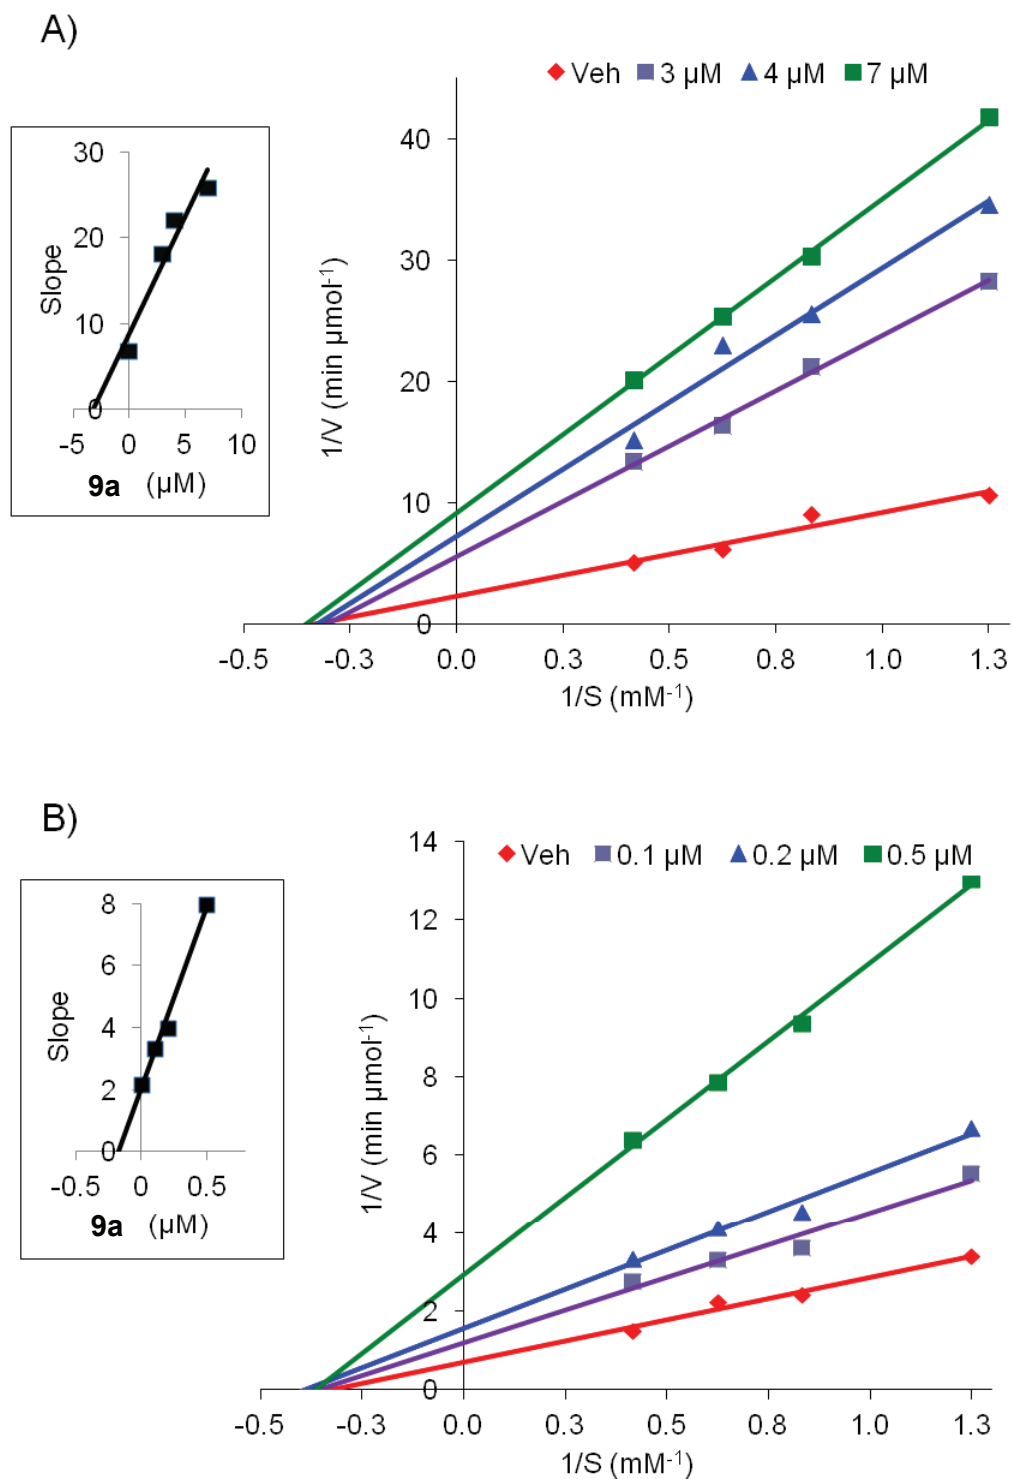

**Figure S56** Inhibition of imiglucerase by **9a**. Double reciprocal plot of imiglucerase incubated at different concentrations of substrate and compound at pH 5.2 (A) or pH 7.4 (B). Regression lines arise from data obtained in two different experiments with triplicates.

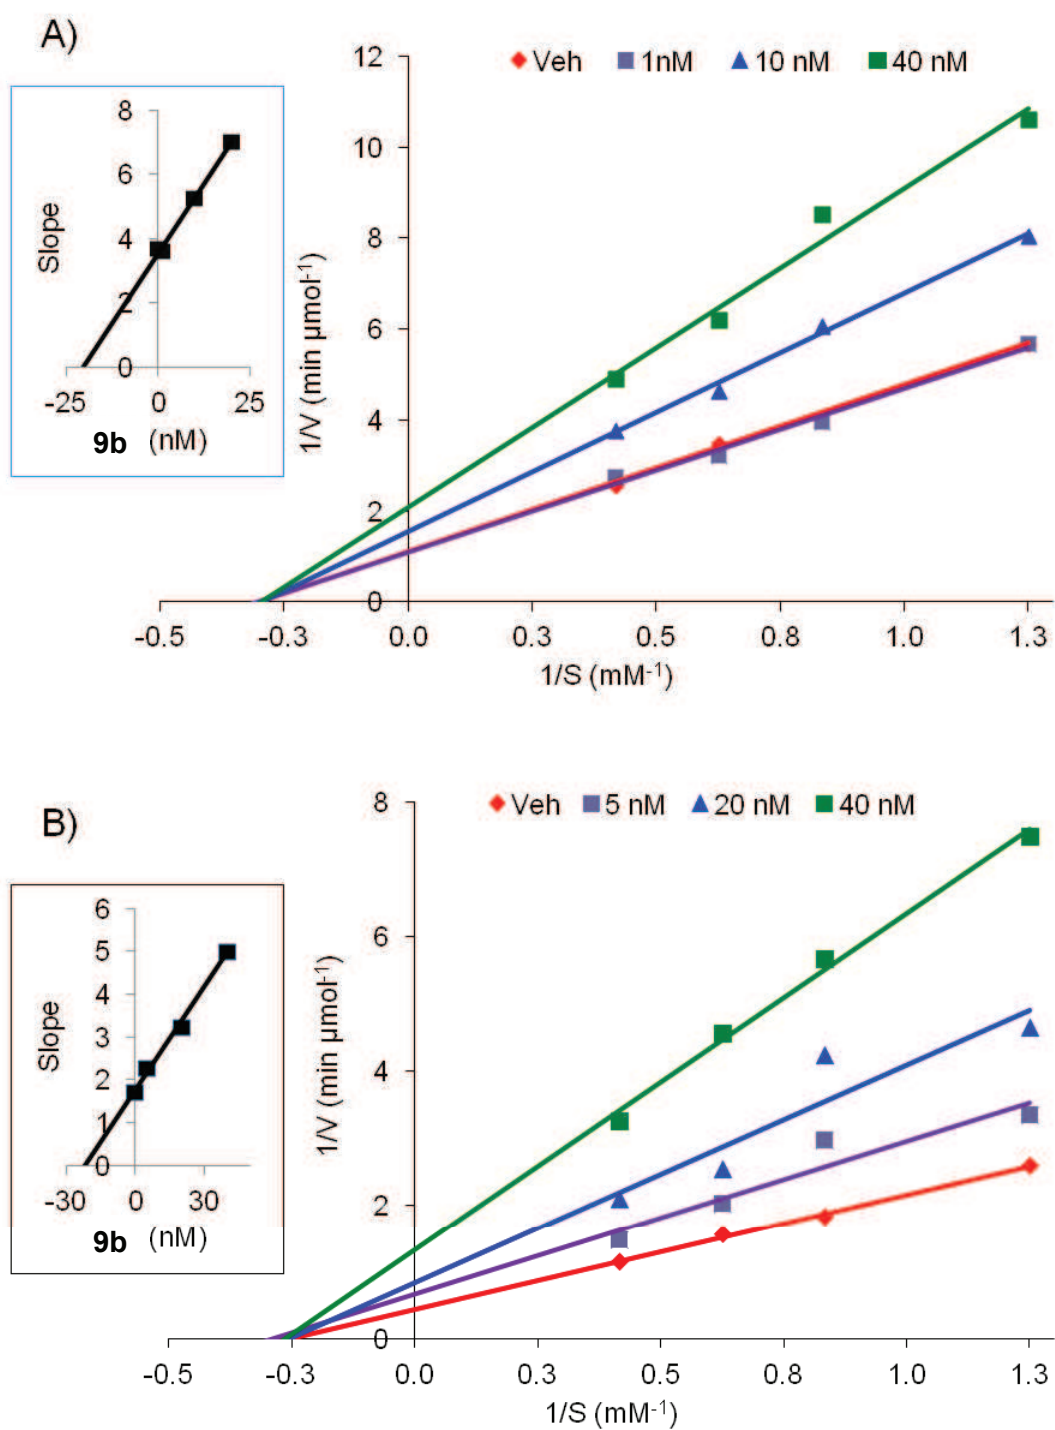

**Figure S57** Inhibition of imiglucerase by **9b**. Double reciprocal plot of imiglucerase incubated at different concentrations of substrate and compound at pH 5.2 (A) or pH 7.4 (B). Regression lines arise from data obtained in two different experiments with triplicates.

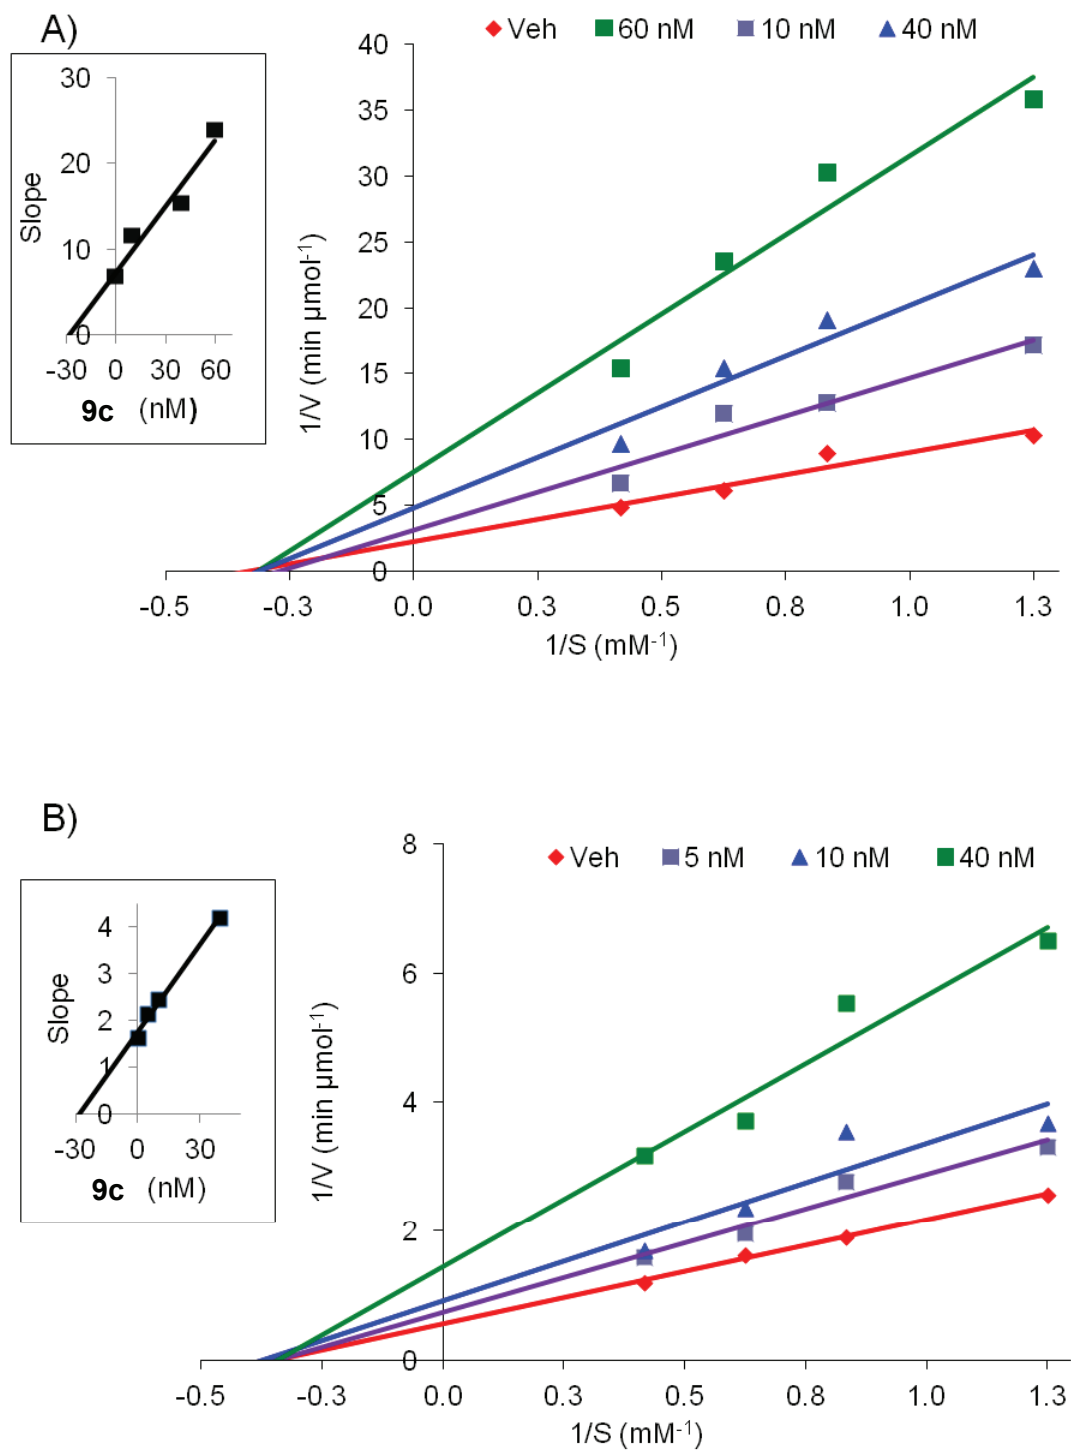

**Figure S58** Inhibition of imiglucerase by **9c**. Double reciprocal plot of imiglucerase incubated at different concentrations of substrate and compound at pH 5.2 (A) or pH 7.4 (B). Regression lines arise from data obtained in two different experiments with triplicates.



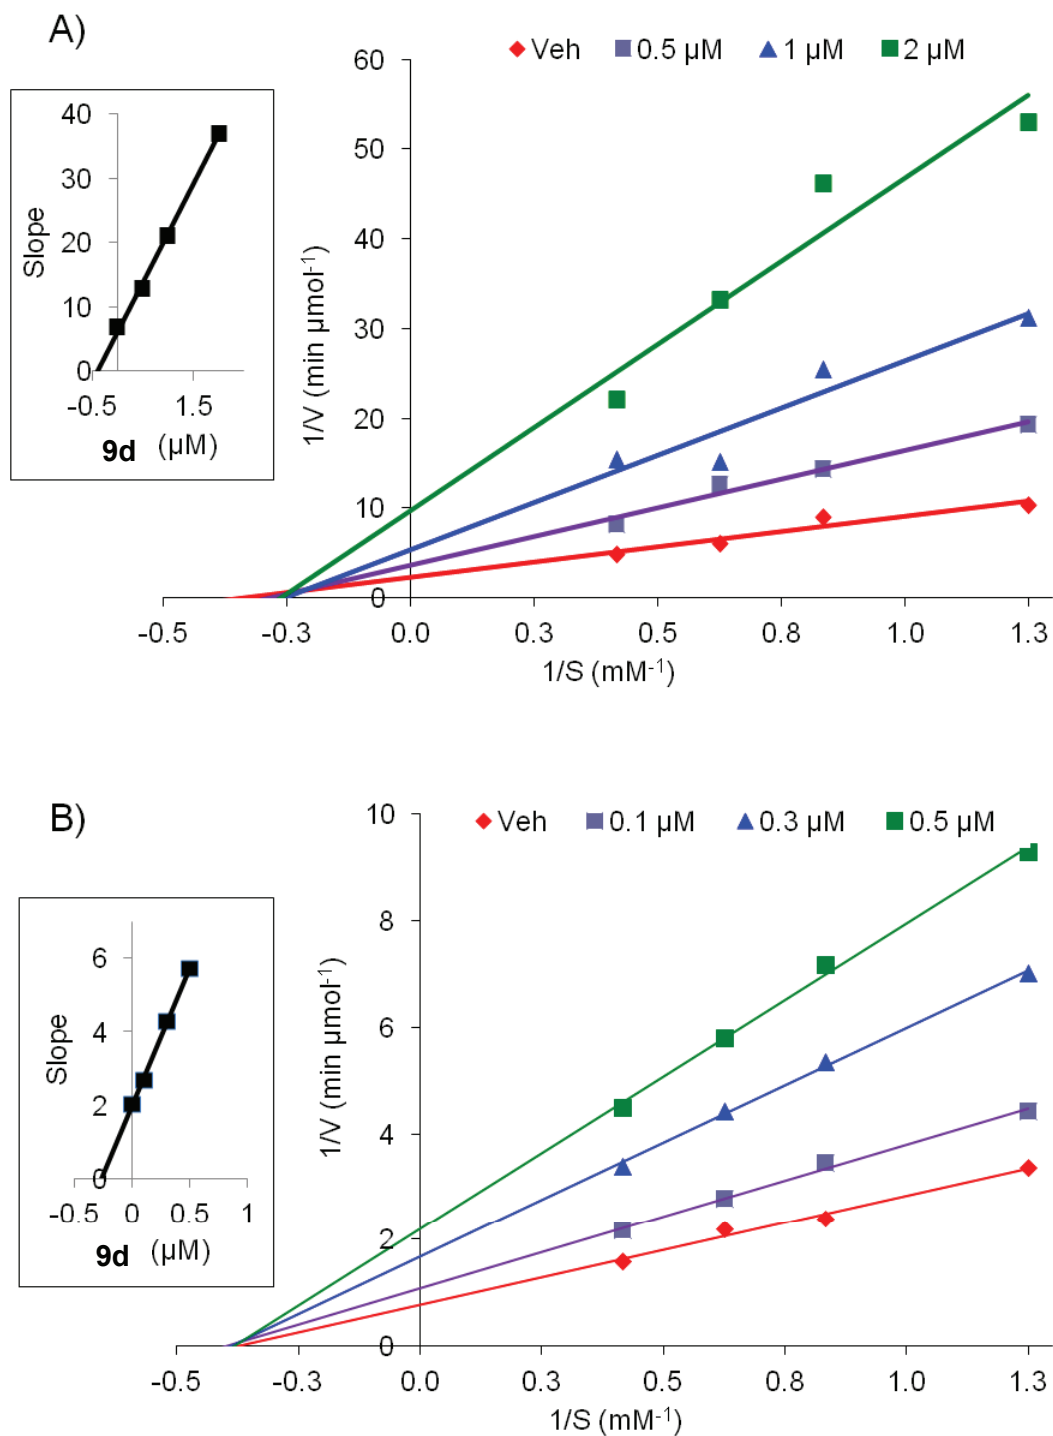

**Figure S59** Inhibition of imiglucerase by **9d**. Double reciprocal plot of imiglucerase incubated at different concentrations of substrate and compound at pH 5.2 (A) or pH 7.4 (B). Regression lines arise from data obtained in two different experiments with triplicates.

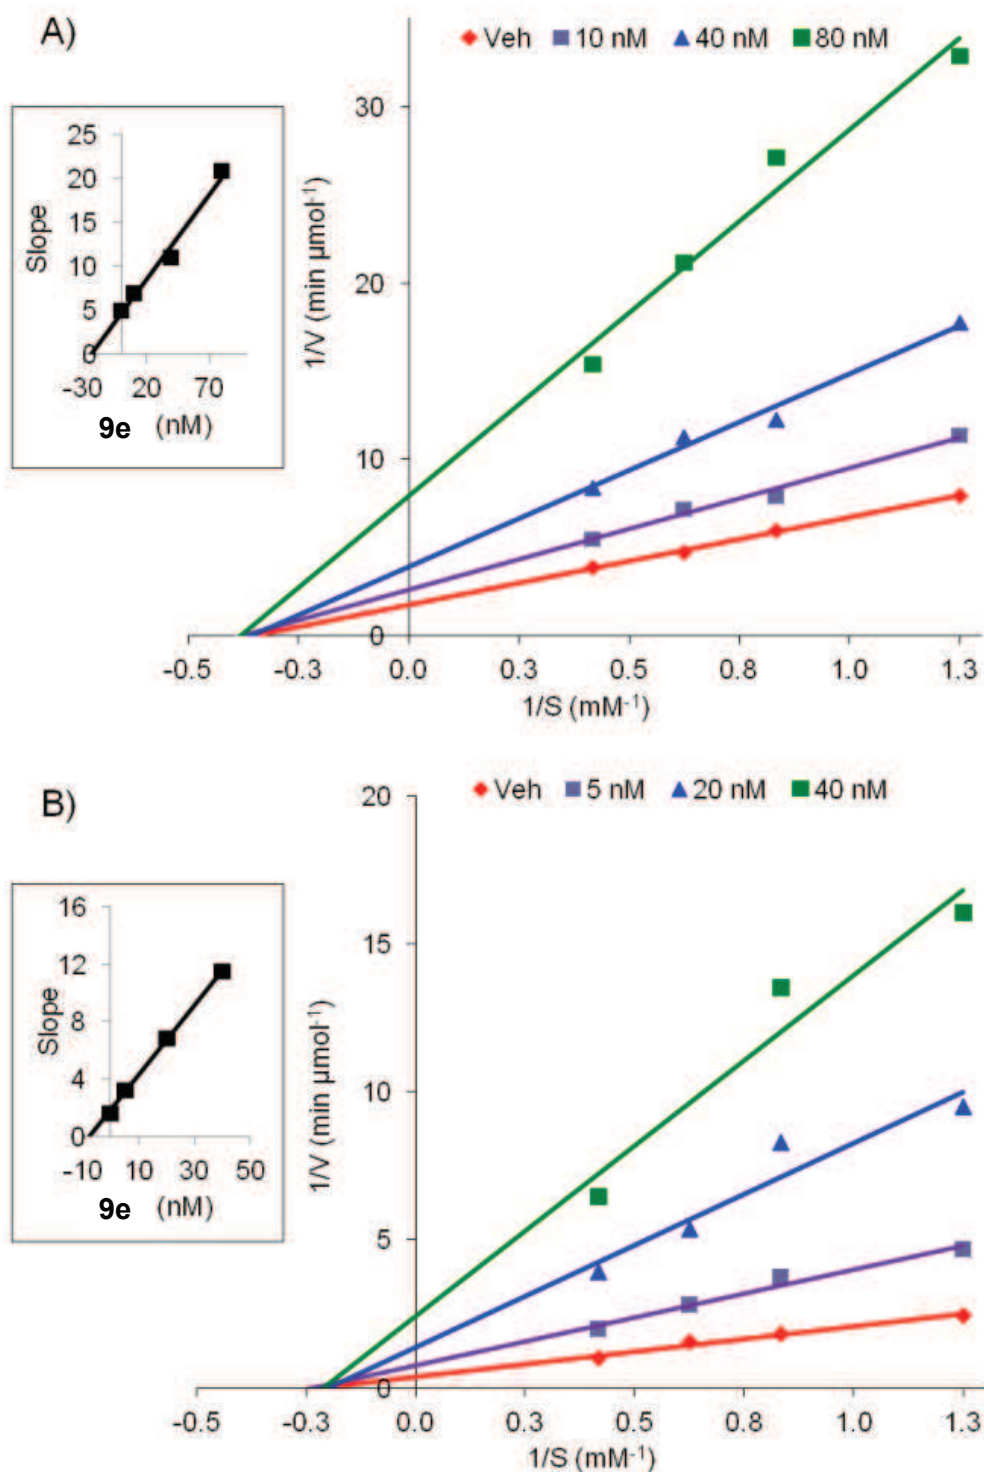

**Figure S60** Inhibition of imiglucerase by **9e**. Double reciprocal plot of imiglucerase incubated at different concentrations of substrate and compound at pH 5.2 (A) or pH 7.4 (B). Regression lines arise from data obtained in two different experiments with triplicates.

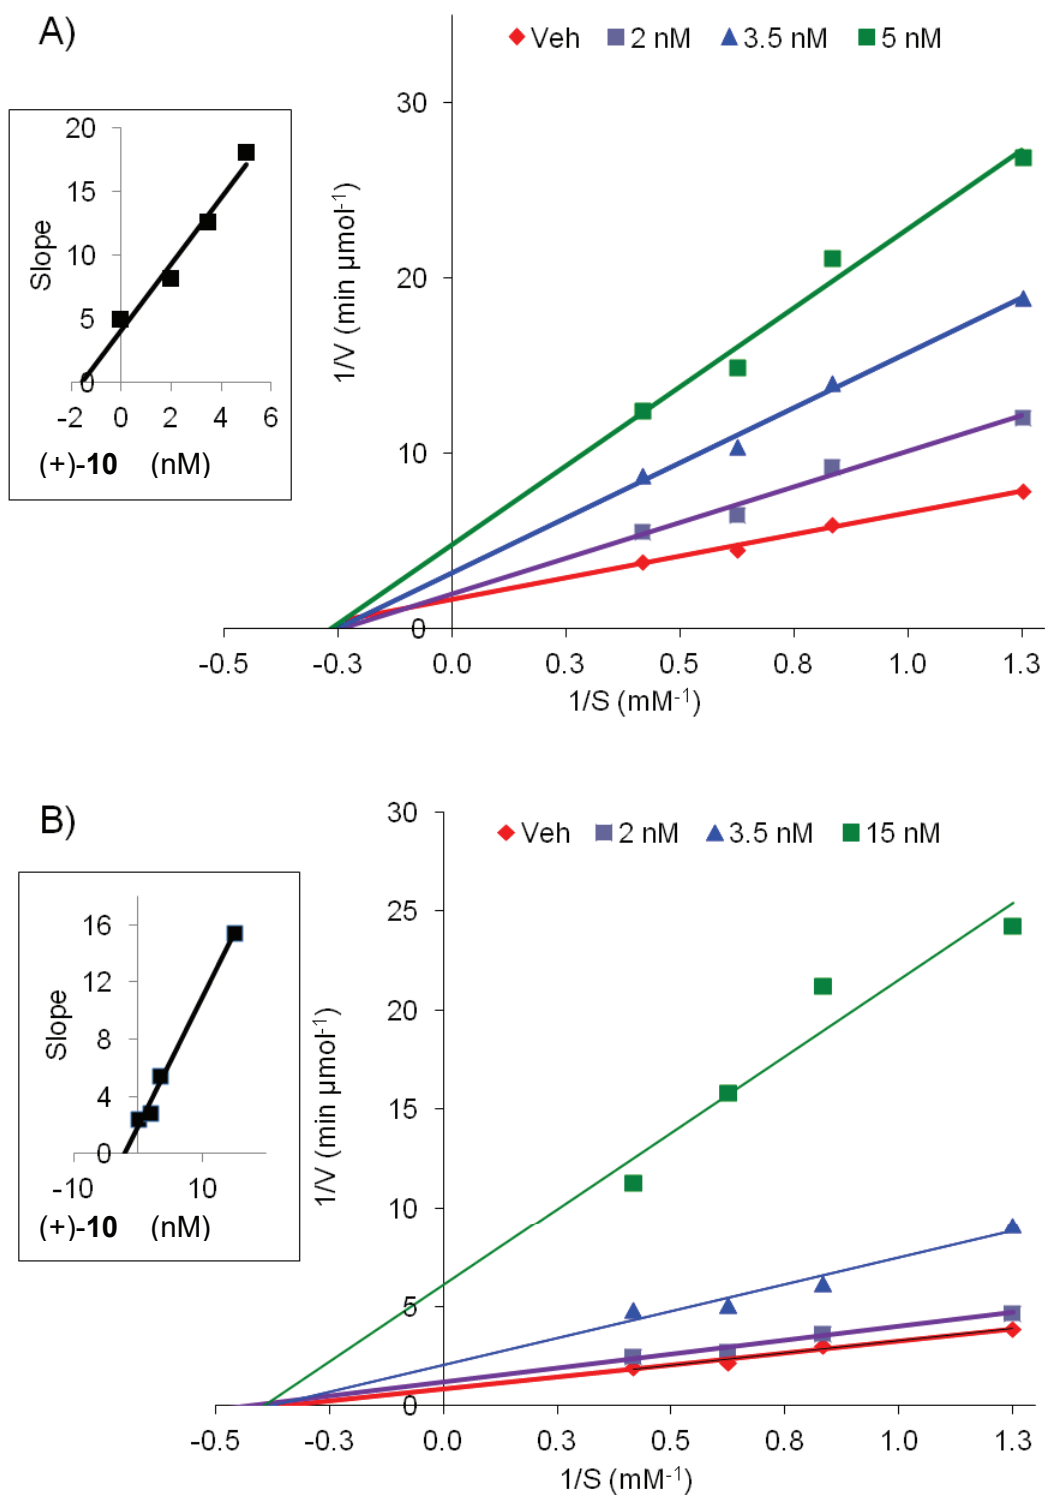

**Figure S61** Inhibition of imiglucerase by (+)-10. Double reciprocal plot of imiglucerase incubated at different concentrations of substrate and compound at pH 5.2 (A) or pH 7.4 (B). Regression lines arise from data obtained in two different experiments with triplicates.

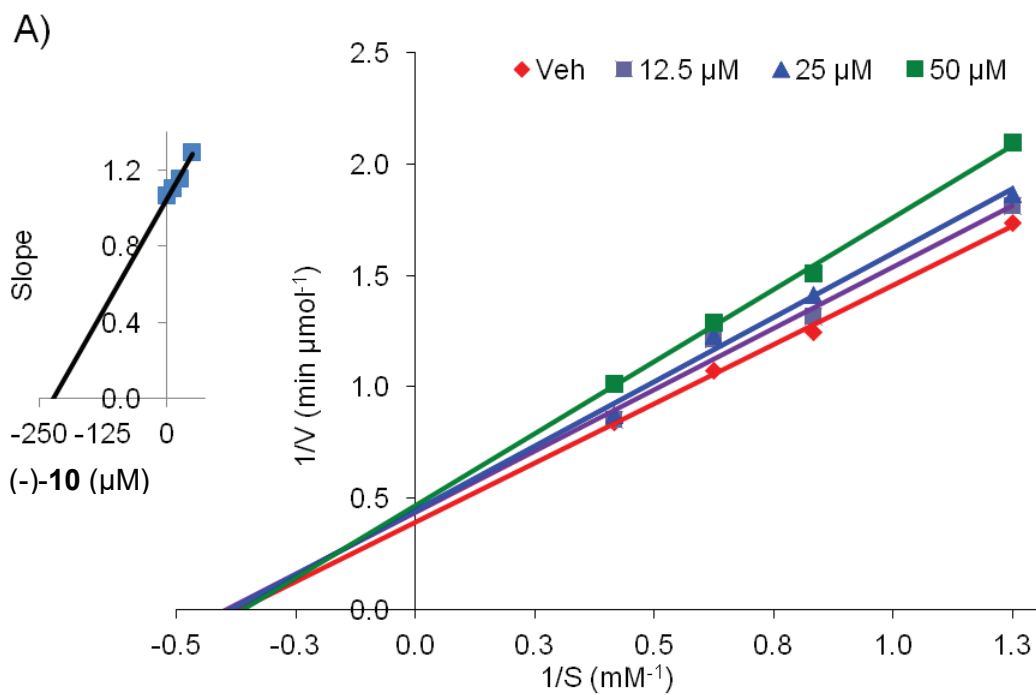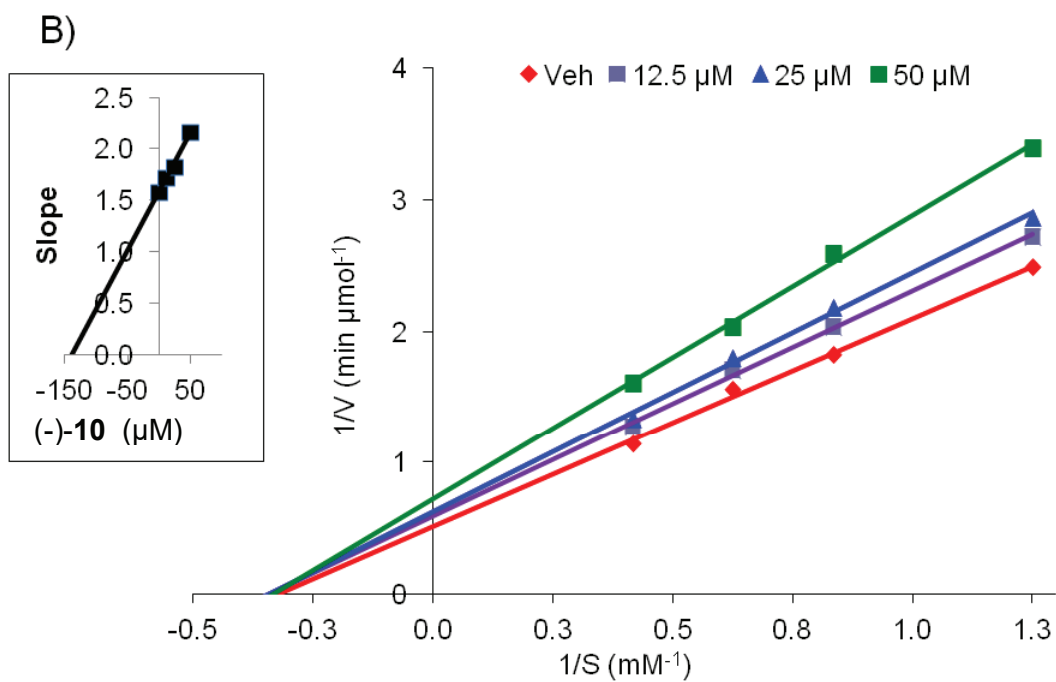

**Figure S62** Inhibition of imiglucerase by  $(-)\text{-10}$ . Double reciprocal plot of imiglucerase incubated at different concentrations of substrate and compound at pH 5.2 (A) or pH 7.4 (B). Regression lines arise from data obtained in two different experiments with triplicates.

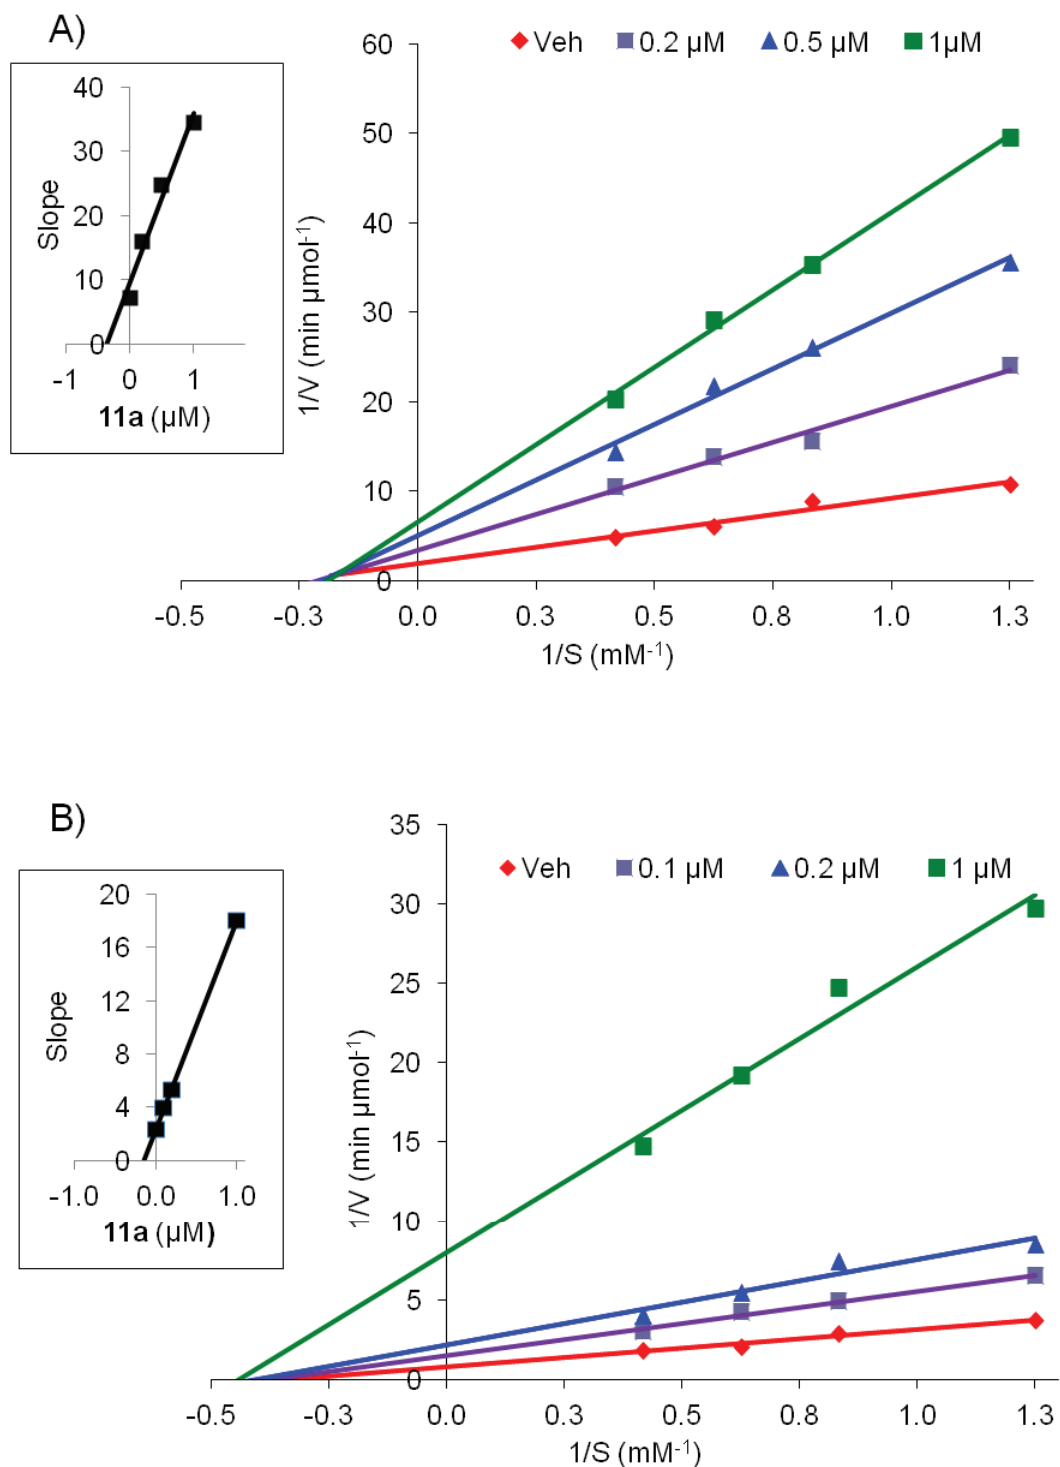

**Figure S63** Inhibition of imiglucerase by (+)-11a. Double reciprocal plot of imiglucerase incubated at different concentrations of substrate and compound at pH 5.2 (A) or pH 7.4 (B). Regression lines arise from data obtained in two different experiments with triplicates.

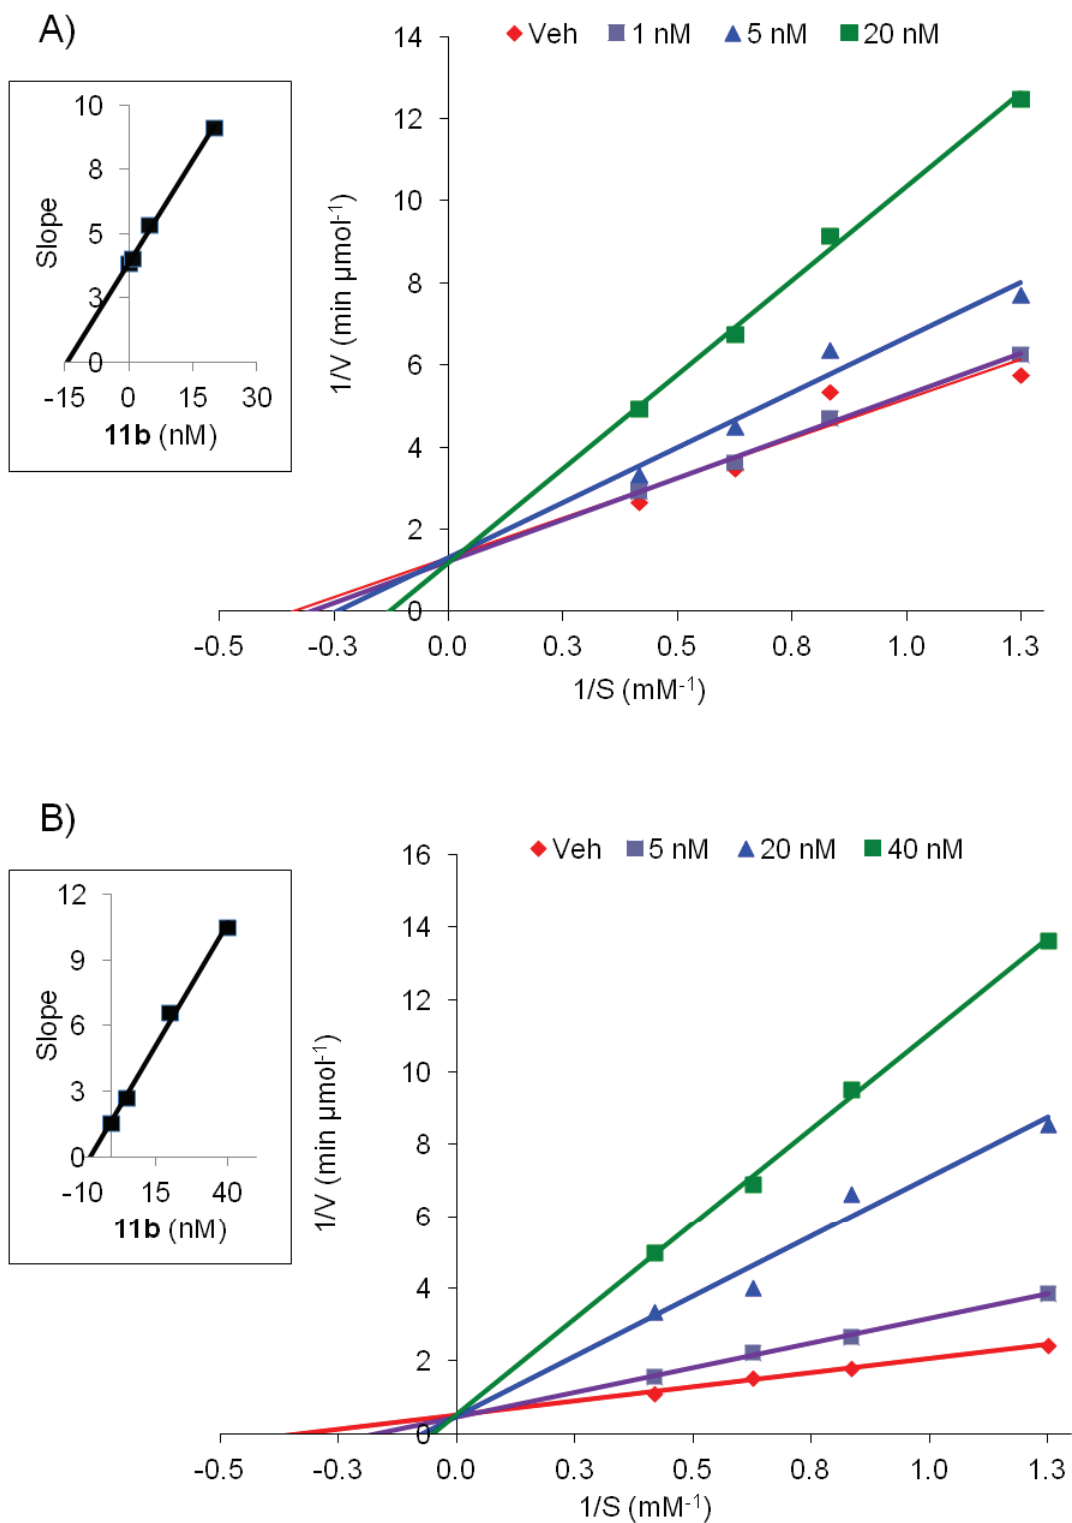

**Figure S64** Inhibition of imiglucerase by (+)-**11b**. Double reciprocal plot of imiglucerase incubated at different concentrations of substrate and compound at pH 5.2 (A) or pH 7.4 (B). Regression lines arise from data obtained in two different experiments with triplicates.

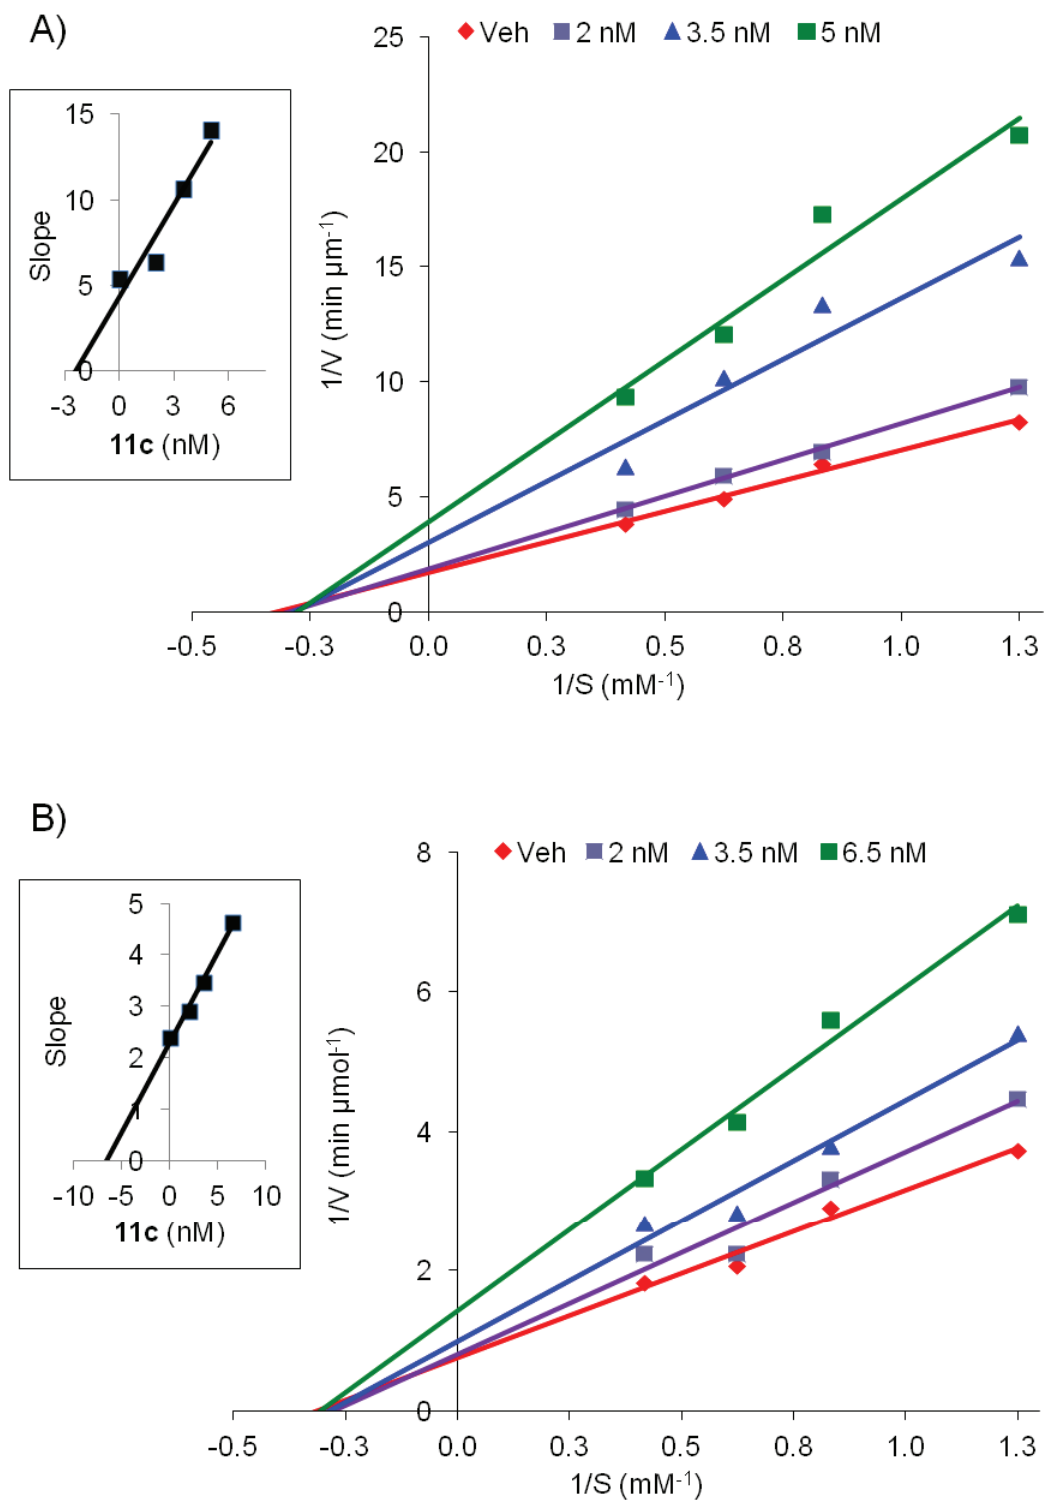

**Figure S65** Inhibition of imiglucrase by (+)-**11c**. Double reciprocal plot of imiglucrase incubated at different concentrations of substrate and compound at pH 5.2 (A) or pH 7.4 (B). Regression lines arise from data obtained in two different experiments with triplicates.

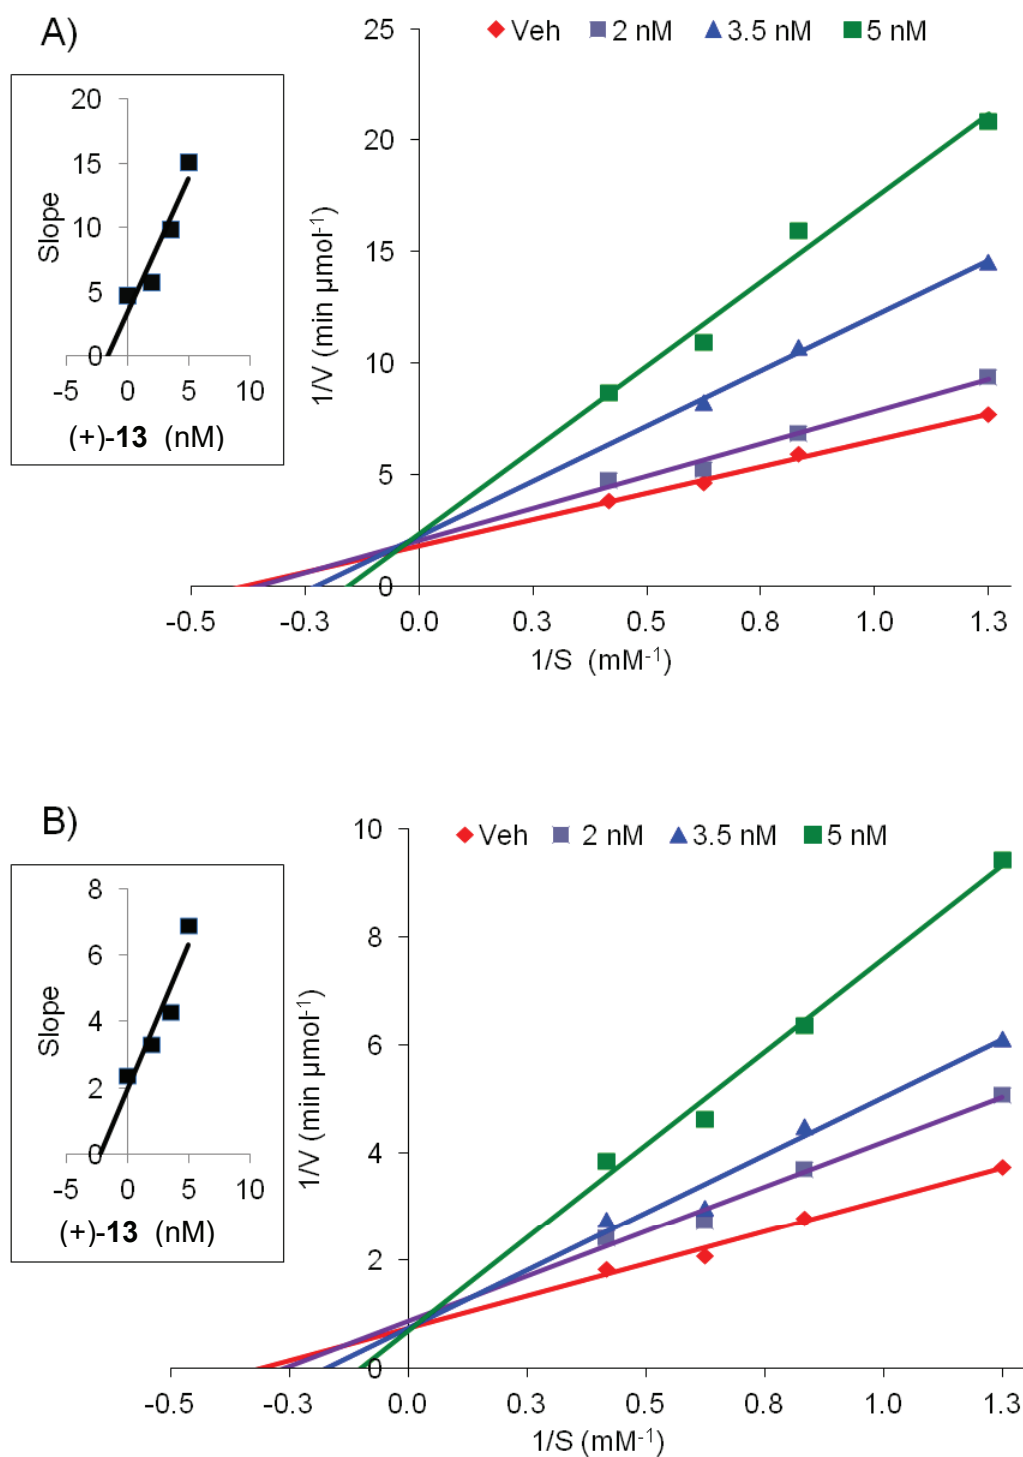

**Figure S66** Inhibition of imiglucerase by (+)-13. Double reciprocal plot of imiglucerase incubated at different concentrations of substrate and compound at pH 5.2 (A) or pH 7.4 (B). Regression lines arise from data obtained in two different experiments with triplicates.



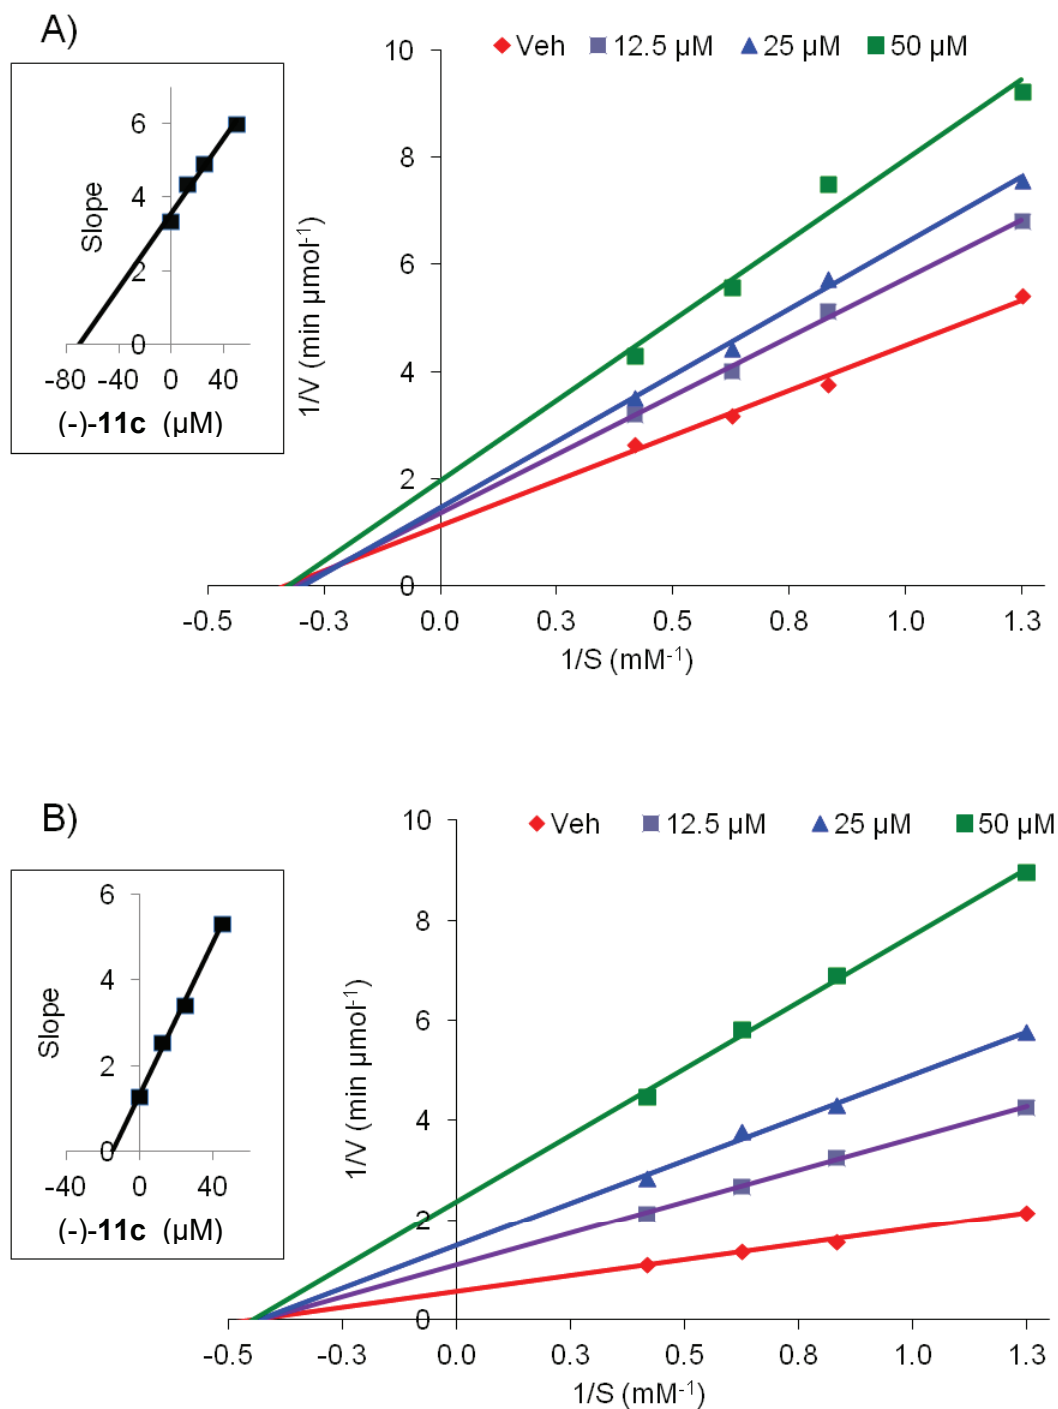

**Figure S67** Inhibition of imiglucerase by (-)-11c. Double reciprocal plot of imiglucerase incubated at different concentrations of substrate and compound at pH 5.2 (A) or pH 7.4 (B). Regression lines arise from data obtained in two different experiments with triplicates.

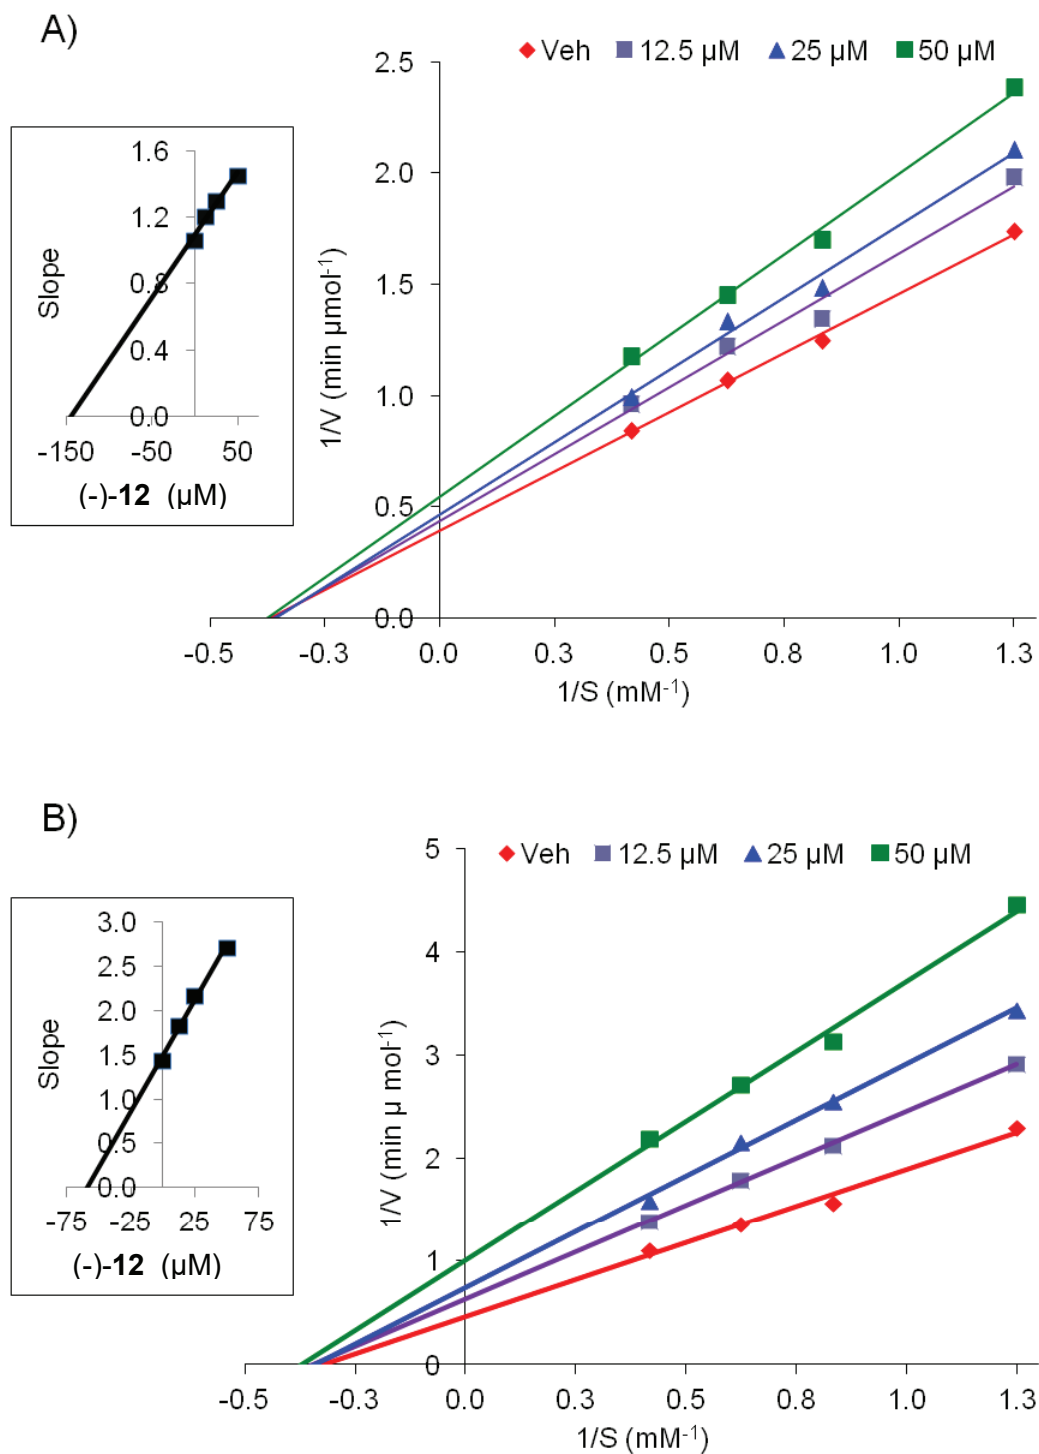

**Figure S68** Inhibition of imiglucerase by (-)-12. Double reciprocal plot of imiglucerase incubated at different concentrations of substrate and compound at pH 5.2 (A) or pH 7.4 (B). Regression lines arise from data obtained in two different experiments with triplicates.

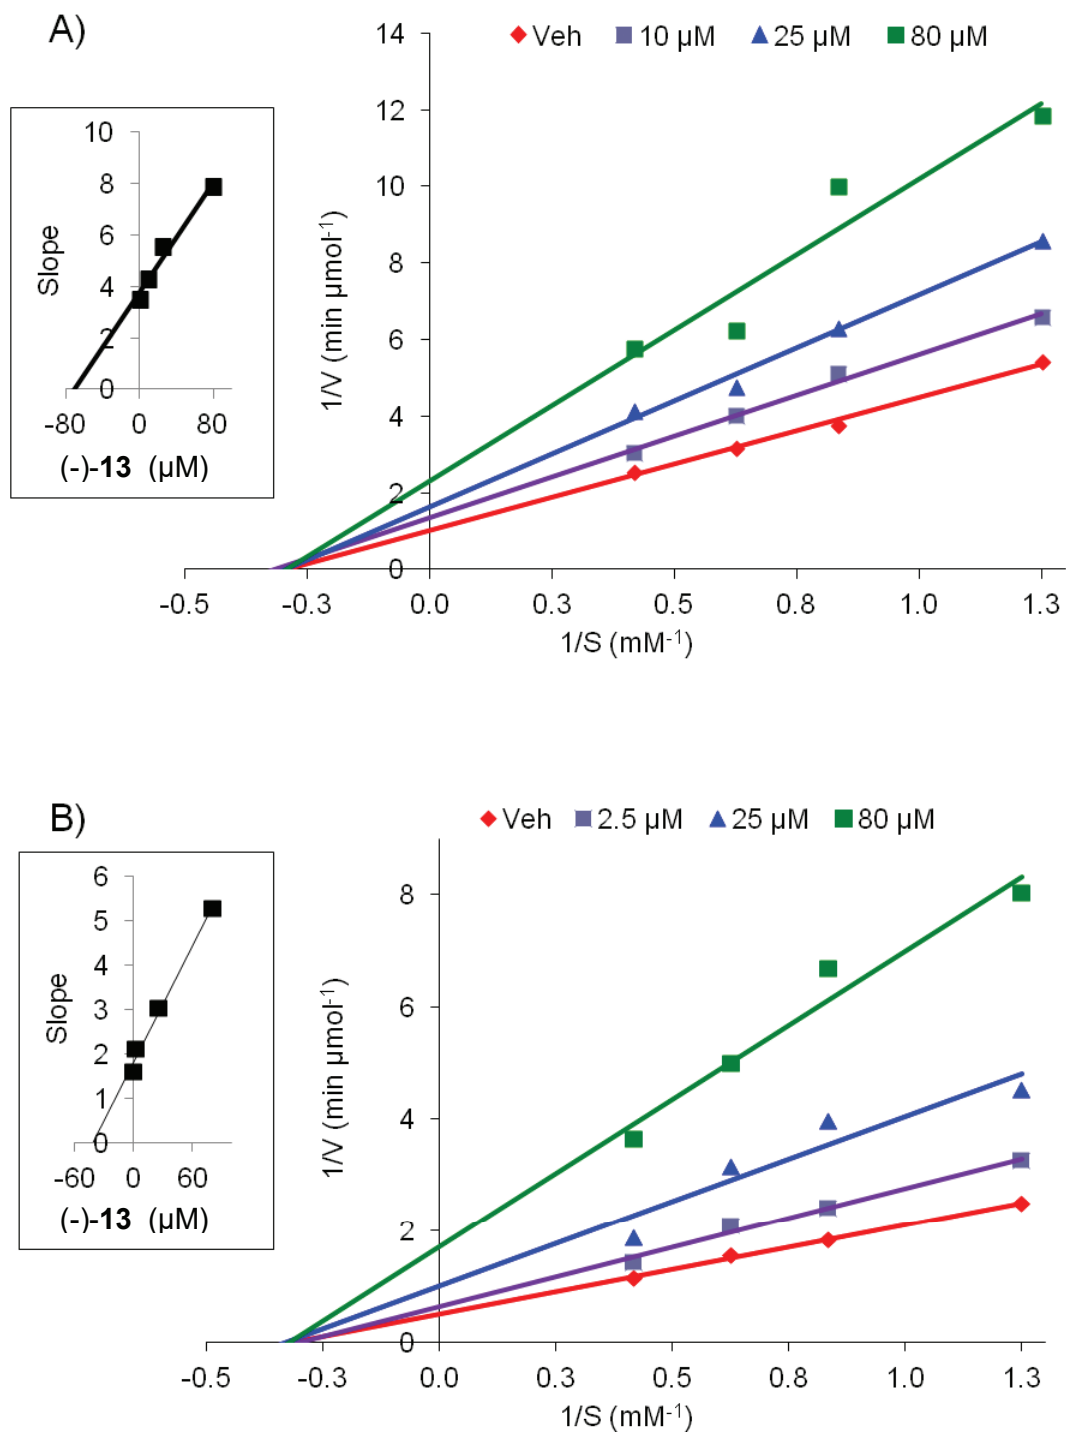

**Figure S69** Inhibition of imiglucerase by (-)-13. Double reciprocal plot of imiglucerase incubated at different concentrations of substrate and compound at pH 5.2 (A) or pH 7.4 (B). Regression lines arise from data obtained in two different experiments with triplicates.

## **References**

- [1] H.-S. Dang, B. P. Roberts, *J. Chem. Soc., Perkin Trans. 1* **2002**, 1161–1170
- [2] D. C. Kapeller, F. Hammerschmidt, *Tetrahedron* **2010**, *66*, 591–598
- [3] S. Mandal, N. Sharma, B. Mukhopadhyay, *Tetrahedron: Asymmetry* **2010**, *21*, 2172–2176
- [4] S. G. Hansen, H. H. Jensen, *Synlett*. **2009**, *20*, 3275-3278
- [5] A. J. Rawlings, H. Lomas, A. W. Pilling, M. J.-R. Lee, D. S. Alonzi, J. S. S. Rountree, S. F. Jenkinson, G. W. J. Fleet, R. A. Dwek, J. H. Jones, T. D. Butters, *ChemBioChem* **2009**, *10*, 1101-1105
- [6] H. Yamakoshi, N. Kanoh, C. Kudo, A. Sato, K. Ueda, M. Muroi, S. Kon, M. Satake, H. Otori, C. Ishioka, Y. Oshima, H. Osada, N. Chiba, H. Shibata, Y. Iwabuchi, *ACS Med. Chem. Lett.* **2010**, *1*, 273-276
- [7] S. M. Goldup, D. A. Leigh, T. Long, P. R. McGonigal, M. D. Symes, J. Wu, *J. Am. Chem. Soc.* **2009**, *131*, 15924-15929
- [8] H. Li, Z. Zhu, A. C. Fahrenbach, B. M. Savoie, C. Ke, J. C. Barnes, J. Lei, Y.-L. Zhao, L. M. Lilley, T. J. Marks, M. A. Ratner, J. F. Stoddart, *J. Am. Chem. Soc.* **2013**, *135*, 456-467
- [9] D. H. Burns, H.-K. Chan, J. D. Miller, C. L. Jayne, D. M. Eichhorn, *J. Org. Chem.* **2000**, *65*, 5185-5196
- [10] K. M. Bongers, R. J. van den Berg, L. H. Heitman, A. P. IJerman, J. Oosterom, C. M. Timmers, H. S. Overkleeft, G. A. van der Marel, *Bioorg. Med. Chem.* **2007**, *15*, 4841–4856
- [11] Y. Liu, A. Kuzuya, R. Sha, J. Guillaume, R. Wang, J. W. Canary, N. C. Seeman, *J. Am. Chem. Soc.* **2008**, *130*, 10882-10883
- [12] B. C. Sanders, F. Friscourt, P. A. Ledin, N. Eric Mbua, S. Arumugam, J. Guo, T. J. Boltje, V. V. Popik, G.-J. Boons, *J. Am. Chem. Soc.* **2011**, *133*, 949-957
- [13] H. J. Kitto, E. Schwartz, M. Nijemeisland, M. Koepf, J. J. L. M. Cornelissen, A. E. Rowan, R. J. M. Nolte, *J. Mater. Chem.* **2008**, *18*, 5615-5624
